Presubmission publication, request for comments:

# Nonequilibrium Thermodynamics and Fitness Costs Associated with Information Preservation May Explain Longevity Differences between Species

Brett N. Augsburger  
Department of Pathobiology  
Auburn University  
Email: [bn0003@auburn.edu](mailto:bn0003@auburn.edu)

Revision Date: March 24, 2016

## Contents

|                                                                                                                  |    |
|------------------------------------------------------------------------------------------------------------------|----|
| <i>Abstract</i> .....                                                                                            | 3  |
| 1 Introduction .....                                                                                             | 3  |
| 2 Nonequilibrium Thermodynamics Stipulates Biomolecular Damage in Living Organisms.....                          | 4  |
| 2.1 A Model System for Analyzing Thermodynamically-Derived Biomolecular Degradation .....                        | 4  |
| 2.2 Preservation of Steady-state Nonequilibrium within a Biomolecular System.....                                | 6  |
| 3 Combatting Degradative Internal Entropy Production within an Organism .....                                    | 11 |
| 3.1 Optimization of Biomolecular Structure .....                                                                 | 11 |
| 3.2 Microenvironment Optimization .....                                                                          | 12 |
| 3.3 Biomolecular Work Rate can Influence the Magnitude of Degradative Internal Entropy Production Rates .....    | 12 |
| 3.4 Extrapolation of Degradation State Concepts to Larger Physical Scales .....                                  | 13 |
| 4 Preservation of DNA Molecular Information .....                                                                | 13 |
| 4.1 Decreases in Mutual Information of DNA Molecules .....                                                       | 13 |
| 4.2 Applicability of the Degradation State Concept to DNA Molecular Ensembles .....                              | 14 |
| 4.3 Considerations for Mutual DNA Information Preservation in Different Cell Types.....                          | 14 |
| 5 Establishing a Connection between Thermodynamic, Information, and Evolutionary Theory in Biological Aging..... | 16 |
| 5.1 In the Individual .....                                                                                      | 16 |
| 5.2 In the Species .....                                                                                         | 17 |
| 6 Examining Degradation Increases in Aging Organisms.....                                                        | 20 |
| 6.1 Energetic Expenditures towards Biomolecular Repair and Replacement – a Paradox?.....                         | 20 |
| 6.2 Organismal Entropy Increases Slowly with Age in Comparison to Internal Entropy Production Rate.....          | 22 |
| 6.3 Biomolecular Degradation - Accumulation versus Homeostatic Shifts .....                                      | 22 |
| 6.4 Entropy-Driven Managed Deterioration – Basic Concepts .....                                                  | 23 |
| 7 Longevity Determination .....                                                                                  | 24 |
| 7.1 Investigating the Rate of Mutual DNA Information Loss in Individuals.....                                    | 25 |
| 7.2 Preserving mtDNA Integrity .....                                                                             | 25 |

|     |                                                                                                                                              |    |
|-----|----------------------------------------------------------------------------------------------------------------------------------------------|----|
| 7.3 | MtDNA Information Loss in Aged Organisms is Primarily the Result of Mutations During Replication.....                                        | 26 |
| 7.4 | A Closer Look at Mitochondrial Configurations and Membrane Composition.....                                                                  | 27 |
| 7.5 | Identifying Longevity Determinants.....                                                                                                      | 29 |
| 7.6 | Allometric Relationships Describe Peak Power Density Trends that Largely Predict Species Lifespan.....                                       | 32 |
| 8   | Longevity Optimization .....                                                                                                                 | 35 |
| 8.1 | Selective Pressures Favor Genotypes that Attenuate Increases in Mortality and Losses in Fecundity Occurring After Reproductive Maturity..... | 36 |
| 8.2 | Deterioration Management Strategies .....                                                                                                    | 37 |
| 8.3 | Longevity Optimization Strategies from Early Adulthood May Serve as Templates for Those Used in Later Life.....                              | 41 |
| 8.4 | Entropy-Driven Managed Deterioration in Further Detail.....                                                                                  | 41 |
| 9   | Connecting the Dots.....                                                                                                                     | 43 |
| 9.1 | Differentiating between Longevity Determinants and Longevity Optimizers .....                                                                | 43 |
| 9.2 | The Number of Genetic Elements Serving as Longevity Determinants/Optimizers Likely Correlates Positively with Organismal Complexity .....    | 46 |
| 9.3 | The Rigidity of Species MLSP.....                                                                                                            | 46 |
| 10  | Summary and Conclusions .....                                                                                                                | 47 |

## Abstract

The aging process in most organisms is enormously complex, involving a multitude of integrated molecular pathways that define and modulate the gradual cellular, tissue and system-level changes that evoke the aging phenotype. Despite this sophistication, the root causes underlying the susceptibility of an organism to aging may be comparatively straightforward. Here, I posit that organismal aging can be explained using a three-legged framework derived from established principles of physics (nonequilibrium thermodynamics and Newtonian), evolutionary theory, and information theory. I suggest that this logic also demonstrates that aging is biologically inevitable. It is argued here that stipulations derived from the second law of thermodynamics and Newtonian mechanics may be critical in defining evolutionary fitness landscapes that vary according to the ability of the organism to resist the loss of data in information-encoding biomolecules (DNA), and in some organisms possibly other biocomponents subject to irreversible fidelity loss, and that this may largely explain the differences in longevity amongst many organisms.

## 1 Introduction

Concepts from evolutionary theory, genetics, biochemistry, and cellular and molecular biology have all been used to attempt to explain biological aging. Yet, despite all of the efforts to unlock the mysteries of aging, recent focus has remained in these areas—more fundamental universal physical law has been under or incorrectly applied, or ignored altogether. Notwithstanding the fact that deterioration is implicated nearly universally in the aging process, the connection to nonequilibrium thermodynamics and entropy production has not been firmly established and is infrequently mentioned. There have been a few notable exceptions; for example, Hayflick contends that entropy alone is sufficient to explain aging (Hayflick, 2007a; 2000; 2004; 2007b).

The second law of thermodynamics (hereafter abbreviated to ‘second law’) stipulates that all energy, regardless of form, has a propensity to transition from a localized state to one that is more spread out, dispersed in space, at a rate that is determined by the ability of contributing external factors to counteract this tendency. In any system that is not at equilibrium, this tendency will result in entropy production by means of irreversible processes. A nonequilibrium system will continue to produce entropy indefinitely until equilibrium is reached, resulting in a transition from a higher concentration of molecular bond energy to a lower bond energy concentration (Demirel, 2014a).

It has been argued that the second law only relates to closed systems and that since organisms are open systems the second law does not apply (Mitteldorf, 2010). This is false—the second law is universally applicable and always satisfied (Kondepudi and Prigogine, 2014). According to modern nonequilibrium thermodynamics, the second law describes the tendency for internal entropy to be produced by any system that is not in equilibrium. Clearly organisms are not in equilibrium and therefore internal entropy is produced continuously in all organisms.

Organisms combat entropy increases by exchanging heat and other forms of energy with their surroundings and importing/exporting entropy in the form of metabolites and catabolites. It has been suggested that any entropy increase in an organism can always be counteracted without repercussions by simply expending energy; from this, some have concluded that there is no thermodynamic stipulation for aging to occur and no role for thermodynamics in explaining aging. This is a rather obvious *non sequitur*—yet this notion has been perpetuated in the aging literature, both explicitly and implicitly (Kirkwood, 1999; Mitteldorf, 2010; Trindade et al., 2013). It will be demonstrated here why this inference is a logical fallacy and how it neglects to consider the effects of internal entropy production within an organism—particularly the influence of internal entropy production on the flow of biomolecular-encoded information over time.

Despite existing in a nonequilibrium state, for a period of time organisms resist the decay to equilibrium. I will consider how internal entropy production is combatted within an organism and how various classes of biomolecules are impacted differently by thermodynamically-explained phenomena.

Internal entropy production will be demonstrated to lead to inevitable reductions in the mutual genetic information contained in DNA molecules over time. While death due to other circumstances may occur first, individuals must

44 eventually succumb to this effect with adequate time. Although germ cells will also inevitably lose mutual DNA  
45 information, species are able to survive and adapt due to selective pressures favoring the resulting genotypes that  
46 maximize fitness. Similarly, losses in genetic information (i.e. mutations) that reduce species fitness are gradually  
47 eliminated from the gene pool.

48 It will also be established how strategies that increase or decrease the rate of loss of mutual DNA information in the  
49 individuals of a species produce concomitant changes in other factors that impact fitness. Long-established allometric (and  
50 other) trends related to lifespan predict the state of many of these factors across a diverse range of species. The described  
51 logic suggests the existence of correlations between species longevity, the rate of loss of mutual DNA information in  
52 individuals of a species and these fitness-modulating factors.

## 53 2 Nonequilibrium Thermodynamics Stipulates Biomolecular Damage in Living Organisms

54 Thermodynamic equilibrium can be characterized as the absence of thermodynamic potentials within a system. Free  
55 energy is minimized in equilibrium systems. In living organisms, energy remains highly concentrated and considerable  
56 thermodynamic potentials exist; i.e. organisms are nonequilibrium dissipative structures. Through the continuous  
57 exchange of energy and matter with the environment, organisms establish an ordered structure with lower entropy than  
58 could be attained if they were in equilibrium. In terms of the preservation of overall biomolecular integrity, an organism  
59 could be characterized as a near steady-state nonequilibrium system—at least if considered over a snapshot-in-time that  
60 is short compared to total lifespan. As the atomic arrangement of biomolecules fails to maximize free energy<sup>1</sup>, the second  
61 law stipulates that irreversible processes that drive the system in the direction of equilibrium will occur and impose insults  
62 on biomolecular structure. This degradative phenomenon must be counteracted by the organism to prevent loss of  
63 biomolecular integrity.

64 Due to the presence of thermal, chemical, mechanical, electrical and other thermodynamic fluxes within an organism, not  
65 to mention significant spatial and temporal heterogeneity of the same at the mesoscopic and macroscopic level, a  
66 multitude of opportunities exist for biomolecular interactions that result in transitions to undesirable structural states.  
67 Mechanical force-based unfolding of proteins and unzipping or shearing of nucleic acids can occur, as can protein folding  
68 alterations and improper protein associations due to crowding (Zhou, 2010). DNA is subject to hydrolysis, oxidation, and  
69 methylation reactions among others (Lindahl, 1993). Denaturation of DNA and protein from excessive temperature is also  
70 possible. The disruption of hydrophobic interactions can occur in many situations and can alter protein conformation.  
71 These are some of the more obvious ways by which a biomolecule could be damaged in a living organism. It should be  
72 apparent that while it is beneficial to the organism for the probabilities of these occurrences to be minimized, it is  
73 impossible to reduce them to zero.

### 74 2.1 A Model System for Analyzing Thermodynamically-Derived Biomolecular Degradation

75 Even in conditions of relative homogeneity, biomolecules will face degradation as stipulated by thermodynamic principles.  
76 For example, biomolecular structure can be compromised by a variety of undesirable chemical reactions that directly alter  
77 the molecular arrangement. To demonstrate the degradative effects of thermodynamic chemical forces on biomolecules,  
78 we will consider a system consisting of a fixed volume of cytosol. The analysis will focus on a single type of biomolecule;  
79 this could be an expressed protein, synthesized lipid or any other biomolecule that is produced by the organism's cellular  
80 machinery. We will assume for this example that the biomolecule of interest is a protein. The temperature and pressure  
81 of the system are in equilibrium with the surroundings and equivalent to physiological values. The concentrations of all  
82 molecules aside from the protein of interest are held constant by chemiostats. The system is assumed to remain in  
83 thermomechanical equilibrium at all times but not chemical equilibrium. Chemical reactions not involving the protein of

---

<sup>1</sup> Not to be confused with free-energy minimization during protein folding and the conformational changes of other biomolecules. In these examples, the free-energy being minimized only considers conformation options for a given atomic structure (transitions that can occur within a very short time period). Even in its lowest free-energy conformation, any given biomolecule will still possess considerable excess energy, largely stored in the bonds between its atoms, compared to an equilibrium state where this energy has been maximally dispersed.

84 interest are inhibited (reaction rates and affinities are zeroed), as are all biomolecular repair and replacement  
85 mechanisms. At time  $t_0$ , every molecule of the protein of interest is in a state consistent with that immediately following  
86 successful protein synthesis, proper folding and post-translational modification (if applicable).

87 In accordance with the second law, the described system will produce internal entropy and transition irreversibly from an  
88 initial state at time  $t_0$  through a very large number of nonequilibrium states until all chemical reaction affinities have been  
89 reduced to zero. Since the system as defined has no means of counteracting internal entropy production, the second law  
90 requires that the only stable or steady state is the chemical equilibrium state. Although some reaction affinities may be  
91 low, even the most improbably reactions must have nonzero reaction rates. The presence of reactive oxygen species (ROS)  
92 may generate reactions with particularly high affinities but such reactions are not the only source of internal entropy  
93 production. During the progression towards chemical equilibrium, the protein can exist in a very large number of  
94 alternative internal states representing various degradative arrangements. The transitions between internal states can be  
95 characterized by reactions of the form

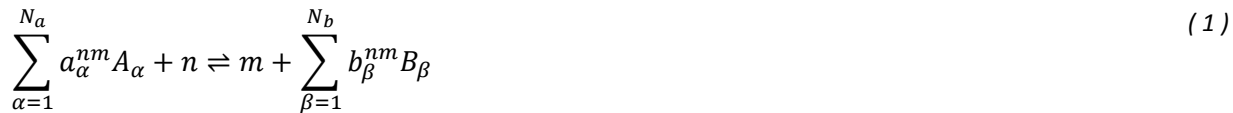

96 where  $n$  and  $m$  are the initial and new protein internal states,  $a_{\alpha}^{nm}$  and  $b_{\beta}^{nm}$  are the number of molecules of reactant ( $A_{\alpha}$ )  
97 or product ( $B_{\beta}$ ) involved in the reaction, and  $N_a$  and  $N_b$  are the number of different reactants and products involved. As  
98 these reactions proceed, internal entropy will be produced until the system reaches equilibrium. The rate of internal  
99 entropy production  $d_i S/dt$  at any time  $t$  up until equilibrium can be expressed as

$$\frac{d_i S}{dt} = \sum_{j=1}^r \sum_{i=1}^k \left( \frac{-v_i^{(j)} \mu_i}{T} \right) \frac{d\varepsilon_j}{dt} > 0 \quad (2)$$

100 where  $k$  is the number of chemical species involved in a particular reaction,  $r$  is the total number of reactions taking place  
101 in the system at time  $t$ ,  $v_i^{(j)}$  are the stoichiometric coefficients,  $\mu_i$  are the chemical potentials, and  $d\varepsilon_j/dt$  represents the  
102 reaction velocity at time  $t$ . At thermodynamic equilibrium, both the reaction velocity and the reaction affinity  $A_r =$   
103  $\sum_{i=1}^k (-v_i^{(j)} \mu_i / T)$  will be zero.

104 Nonspontaneous processes can also occur during the degradation towards system equilibrium by way of being driven  
105 through thermodynamic coupling (Wang, 2009). Although these processes will usually also result in a biomolecule  
106 transitioning into a biologically undesirable internal state, negative entropy may be produced locally. Per the second law,  
107 internal entropy production must be non-negative in nonequilibrium systems at all times. Therefore, any negative internal  
108 entropy produced by a nonspontaneous process will be offset by positive internal entropy production elsewhere in the  
109 system.

110 The described system illustrates why biomolecular degradation will occur continuously within all organisms, tissues, and  
111 cells—due to both spontaneous and nonspontaneous reactions. For homeostasis (steady-state) to be preserved, this  
112 degradation must be combatted by biological mechanisms capable of producing sufficient negative entropy to offset the  
113 internal entropy being produced. Obviously, degradative internal entropy production in a living organism is not limited to  
114 chemical reactions, as in the system above, but will also include contributions due to heat, mass, and momentum transfer  
115 as well as electrical, magnetic, and other effects. Each of these factors can be modelled similarly using modern  
116 nonequilibrium thermodynamic theory and the second law in particular, which establishes an arrow of time stipulating  
117 that the future can be distinguished from the past by an ever increasing quantity of internal entropy produced.

## 2.2 Preservation of Steady-state Nonequilibrium within a Biomolecular System

Returning to our model system from the previous section, the ultimate endpoint of this system represents a state where all of the examined biomolecule have fully degraded and internal entropy production has ceased. Once this state is reached, all reaction affinities  $A_r$  and reaction velocities  $d\varepsilon_j/dt$  will be zero, and the system will be in equilibrium.

The total entropy increase in the system at any time  $t$  is

$$dS_{sys,t} = \int_{t_0}^t \left( \frac{d_e S}{dt} + \frac{d_i S}{dt} \right) dt = \frac{Q_{tot}}{T} + \int_{t_0}^t \sum_{j=1}^r \sum_{i=1}^k \left( \frac{-v_i^{(j)} \mu_i}{T} \right) \frac{d\varepsilon_j}{dt} dt \quad (3)$$

Here,  $d_e S/dt$  represents the rate of entropy gain/loss in the system due to the exchange of energy with the surroundings (heat flowing into or out of the system).  $Q_{tot}$  represents the total heat that has been transferred to/from the system between time  $t_0$  and time  $t$ . Utilizing the change in system entropy  $dS_{sys,t}$  for any time  $t$  and the increase in system entropy corresponding to the equilibrium condition  $dS_{sys,max}$ , we can define a new parameter to represent the degree to which the biomolecular ensemble under examination has degraded. This will be called 'degradation state'  $D$  and is calculated

$$D(t) = \frac{dS_{sys,t}}{dS_{sys,max}} \quad (4)$$

A  $D$  of 1 corresponds to full degradation, while a value of 0 is representative of a pool of fully intact biomolecules. To prevent the described system from transitioning to an equilibrium state with maximum disorder and to preserve a steady state, the entropy being produced must be counteracted such that the following equation is satisfied

$$\dot{S}_{sys} = \frac{d_e S}{dt} + \frac{d_i S}{dt} = 0 \quad (5)$$

Since the second law stipulates that  $d_i S/dt > 0$ , in order to maintain a steady state

$$\frac{d_e S}{dt} = -\frac{d_i S}{dt} < 0 \quad (6)$$

As expected, negative entropy must be introduced into the system in order for biomolecular integrity to be preserved (i.e. prevent an increase in system entropy). Suppose that the system incorporates a replacement mechanism that replaces  $\dot{N}_{rc}$  moles  $s^{-1}$  of degraded biomolecules with newly expressed or fully-repaired biomolecules. A steady state can be maintained if

$$D_{rep} \frac{-dS_{sys,max}}{N_{tot}} \dot{N}_{rc} = -\frac{d_i S}{dt} \quad (7)$$

Where  $D_{rep}$  represents the average degradation state of a replaced biomolecule and  $N_{tot}$  is the total number of the biomolecule of interest in moles. We can rearrange Eq. (7) to solve for replacement rate. (The rate of internal entropy production will be denoted by  $\dot{S}_i$  instead of  $\frac{d_i S}{dt}$  for purposes of clarity.)

$$\dot{N}_{rc} = \dot{S}_i N_{tot} (D_{rep} * dS_{sys,max})^{-1} \quad (8)$$

The degradation state  $D$  of a biomolecular pool specifies the level of degradation of the average biomolecule but it does not indicate how well biomolecules perform at that degradation state. A new term, biomolecular performance  $P$ , will be used to quantify the relative ability of a biomolecule to perform its intrinsic biological function(s). A value for  $P$  of 1 indicates that the average biomolecule in an ensemble is able to perform 100% of its intrinsic biological function(s), or in other words, the ensemble will perform as if all biomolecules were in ideal condition. A  $P$  of 0 denotes that the average biomolecule can perform none of its intrinsic biological function. Ultimately, we would like to express biomolecular

146 replacement rate  $\dot{N}_{rc}$  as a function of biomolecular performance. Several more relationships must be defined before this  
 147 is possible.

148 Let us examine how biomolecular performance relates to degradation state. Biomolecular insults are inevitable and  
 149 common occurrences; for this reason, biomolecules must retain the ability to perform their intrinsic biological function  
 150 even when some level of damage (i.e. an increase in entropy) is present. If a biomolecule did not have this capability, only  
 151 a very small percentage of biomolecules within a pool would be functional at any given time.

152 Many small singular insults to a biomolecule will have little to no effect on biomolecular performance (although certainly  
 153 some singular insults can render a biomolecule nonfunctional or significantly compromised). As the number of insults  
 154 incurred by a biomolecular pool begins to accumulate, biomolecular performance must decrease at a rate which will  
 155 increase with further degradation. As the degradation state continues to increase, an inflection point will eventually be  
 156 reached where the rate of decrease in  $P$  has achieved a maximum and further increases in degradation state will result in  
 157 increasingly lower rates of decrease in  $P$ . The described relationship between biomolecular performance and degradation  
 158 state can be approximated by a logistic curve. This can be represented as

$$P(D) = [1 + e^{k(D-D_{P50})}]^{-1} \quad (9)$$

159 Parameter  $D_{P50}$  specifies the biomolecular degradation state value that corresponds to a biomolecular performance of  
 160 0.5. In other words  $D_{P50}$  is a way to signify how much degradation a biomolecular ensemble can incur before losing half  
 161 its performance.  $D_{P50}$  can be thought  
 162 of as a measure of biomolecular  
 163 durability. The parameter  $k$  specifies  
 164 the steepness of the curve, or the  
 165 relative ability of a biomolecule to  
 166 resist decreases in performance with  
 167 increasing degradation; for this  
 168 reason,  $k$  can be viewed as a measure  
 169 of biomolecular resiliency (lower  
 170 values indicate increased resiliency).

171 Fig. 1 illustrates some hypothetical  
 172 graphs of  $P$  as a function of  $D$  for  
 173 various values of  $k$  and  $D_{P50}$ .

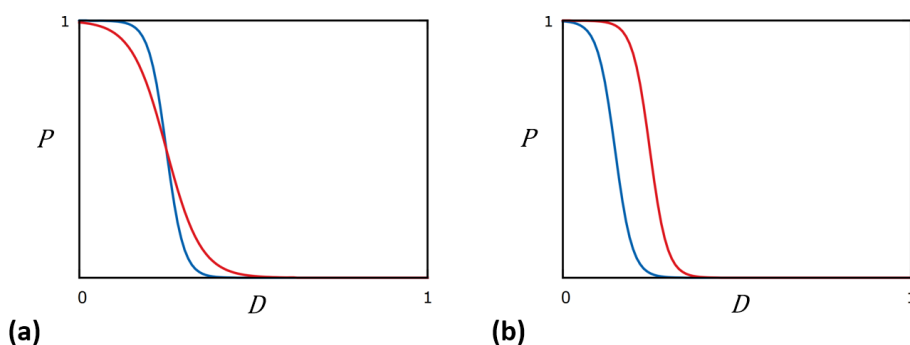

Fig. 1. Hypothetical biomolecular performance - degradation state curves that demonstrate the result of modulating different parameters from Eq. ( 9 ). (a)  $D_{P50} = 0.25$ ,  $k = 40$  (blue),  $k = 20$  (red). (b)  $D_{P50} = 0.15$  (blue),  $D_{P50} = 0.25$  (red),  $k = 40$ .

174 Next, we will derive a means to express the average degradation state of a biomolecule undergoing turnover in terms of  
 175 the biomolecular performance of the ensemble. For this purpose, it will be assumed that the biomolecular  
 176 repair/replacement mechanisms are able to differentiate between the performance state of individual molecules and that  
 177 the average biomolecular performance of a repaired/replaced biomolecule is  $m\%$  of the average biomolecular  
 178 performance of the ensemble. By rearranging Eq. ( 9 ) and incorporating the  $m$  term we arrive at the desired expression

$$D_{rep}(P) = D_{P50} + k^{-1} \ln\left(\frac{100}{mP} - 1\right) \quad (10)$$

179 Obviously, this relation does not perfectly describe the exact behavior of a cellular biomolecular repair and replacement  
 180 strategy. However, for the purposes of the current discussion this approximation will be sufficient.

181 Lastly, to express biomolecular replacement rate in terms of biomolecular performance for a steady-state scenario we  
 182 require an expression for the rate of internal entropy production as a function of degradation state. Eq. ( 2 ) described the  
 183 rate of internal entropy production in terms of chemical reaction affinities and velocities. We can approximate a  
 184 transformation of this equation into one that is a function of degradation state by considering some aspects of the  
 185 reactions occurring within the system. For the time being, we will disregard radical and other chain-type reactions. We

will assume that there are a very large number of potential reactions and the reaction velocities of these reactions are widely and relatively evenly dispersed. Reactions with high reaction velocities will tend to occur before those with lower reaction velocities. In other words, reactions with high reaction velocities will be more prevalent at low degradation states. As degradation state increases, reactions with lower reaction velocities will begin to represent a larger proportion of the internal entropy being produced. However, there will be fewer total reactions because reactions with higher reaction velocities will have already completed. Therefore, as degradation state increases, the reaction velocity of the average reaction will decrease (reducing  $\dot{S}_i$ ) and there will be fewer total possible reactions (further reducing  $\dot{S}_i$ ). For this reason,  $\dot{S}_i$  as a function of degradation state can be approximated by an exponential decay relationship.

$$\dot{S}_i(D) = \dot{S}_{max} e^{-rD} \quad (11)$$

Where  $\dot{S}_{max}$  is the maximum rate of internal entropy production (corresponding to a  $D$  of zero) and  $r$  is the exponential decay constant. Actual values of  $r$  should always be greater than 0.

Finally, we have all the requisite relationships to express biomolecular replacement rate  $\dot{N}_{rc}$  as a function of biomolecular performance. Combining Eqs. (8) thru (11), and solving for  $\dot{N}_{rc}$  yields

$$\dot{N}_{rc}(P) = \dot{S}_{max} e^{-rD_{P50}} (P^{-1} - 1)^{-\frac{r}{k}} \left( D_{P50} + k^{-1} \ln \left( \frac{100}{mP} - 1 \right) \right)^{-1} \frac{N_{tot}}{dS_{sys, max}} \quad (12)$$

Biomolecular replacement rate is of particular importance as it closely correlates with the rate of energetic resource consumption required to maintain a specific level of biomolecular performance. The performance of a given biomolecular ensemble must satisfy cellular/organismal requirements. Therefore, it is of interest to consider how biomolecular performance and replacement rate relate to each other and how other parameters may effect this relationship.

In the first hypothetical scenario, we will examine the effects of modulating the exponential decay constant  $r$  (Fig. 2, Case A). Higher values of  $r$  equate to an increase in the rate of decay of internal entropy production with increasing degradation state (demonstrated in Fig. 2A.2 for three different values of  $r$ ). As long as  $r$  is not less than or equal to zero (or in other words, provided that internal entropy production decreases with degradation state), there will be a particular performance value above and below which any change in replacement rate will have a diminishing effect on biomolecular performance. This is illustrated by plotting  $\frac{d\dot{N}_{rc}}{dP}$  as a function of  $P$ . The minima in Fig. 2A.4 represent the biomolecular performance values where the return on investment (in terms of rate of consumption of cellular energetic resources) towards biomolecular replacement rate is maximized. This demonstrates the presence of a tradeoff between biomolecular performance and cellular energetic resource return on investment (ROI).

Next we will consider two variations of a biomolecule that share the same degradation state for a particular performance value but differ in resiliency (parameter  $k$ ) due to differences in biomolecular structure. This is depicted in Fig. 2B.1 for a shared performance value of 0.95.  $\dot{S}_i(D)$  is similar for both variations (Fig. 2B.2). Increasing biomolecular resiliency (decreasing  $k$ ) allows for the same biomolecular performance to be achieved with lower replacement rates (Fig. 2B.3). All else being equal, selective pressure should favor biomolecular configurations that maximize resiliency.



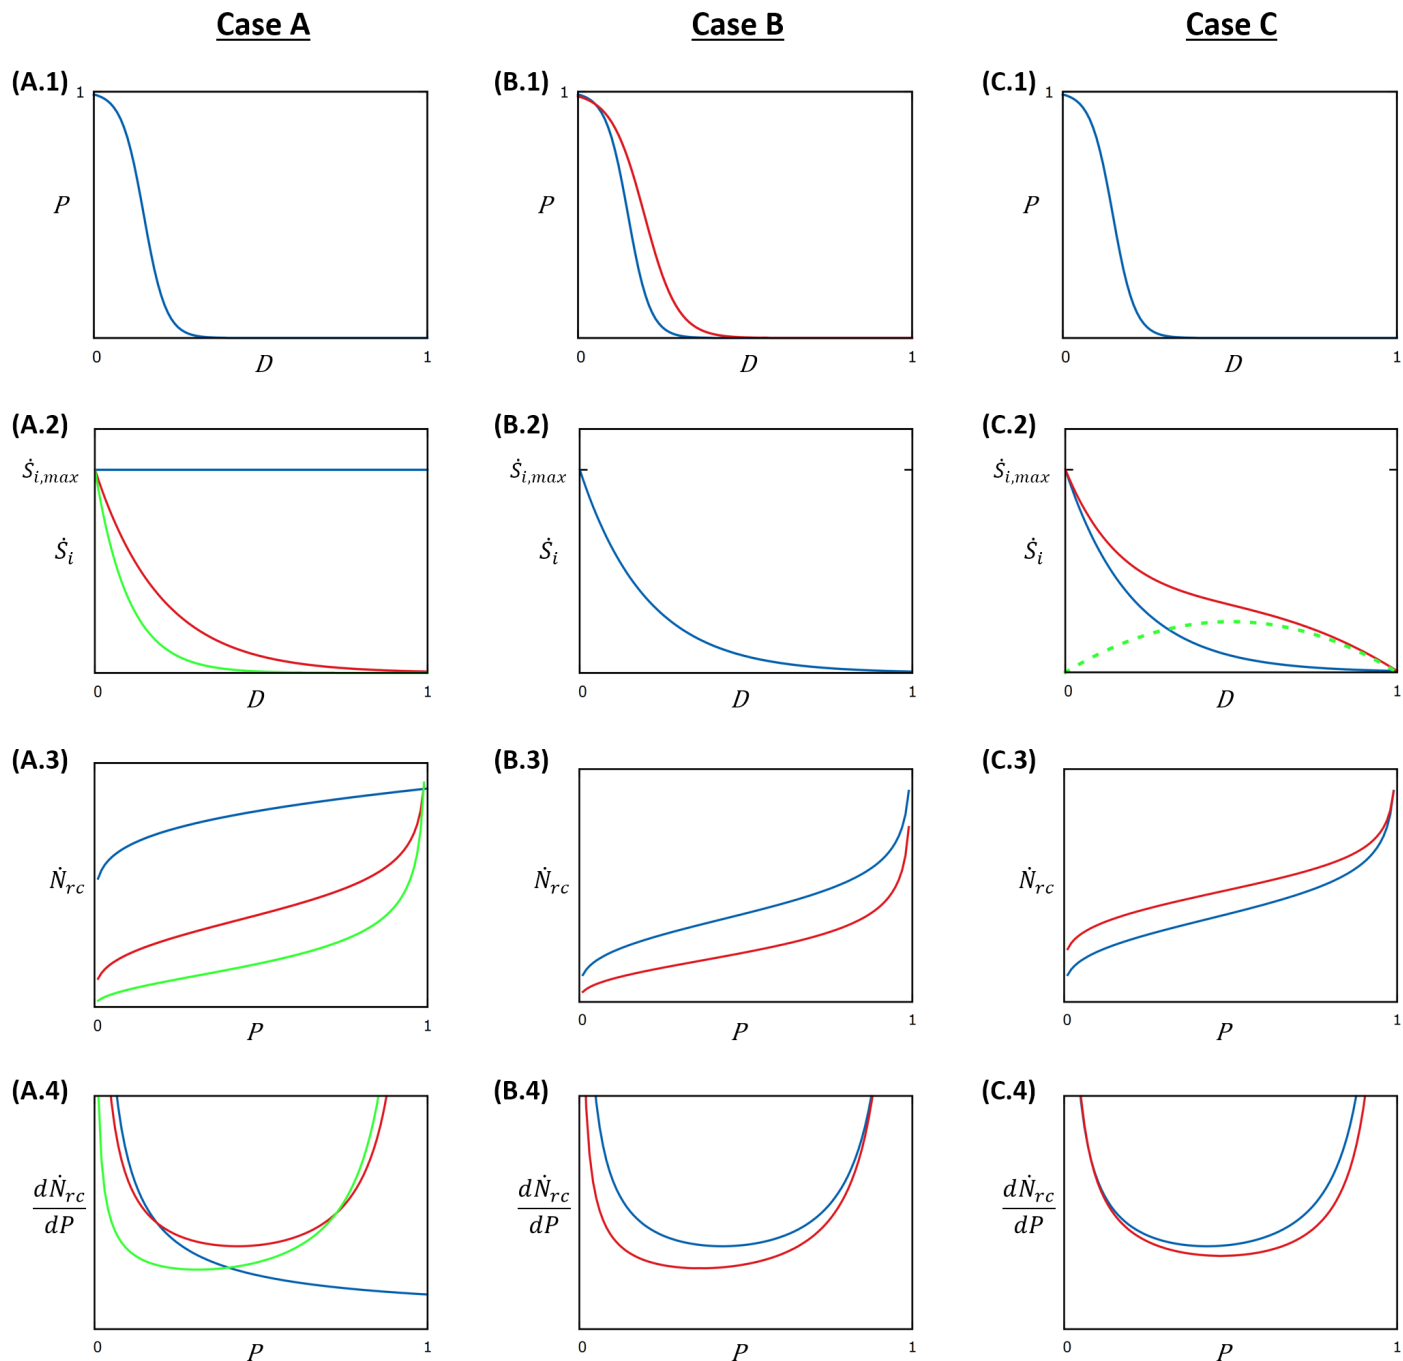

Fig. 2. Three hypothetical biomolecular repair/replacement scenarios demonstrating the relationships between biomolecular performance, degradation state, and repair/replacement rate. Case A: Effects of altering parameter  $r$ .  $DP_{50} = 0.15$ ,  $k = 30$ ,  $m = 10$ ,  $r = 0$  (blue),  $r = 5$  (red),  $r = 10$  (green). Case B: Increasing biomolecular resiliency (lowering  $k$ ) reduces the biomolecular replacement rate required to achieve a given performance. Both variations have the same degradation state at a performance value of 0.95.  $DP_{50} = 0.15$  (blue),  $DP_{50} = 0.199$  (red, calculated),  $k = 30$  (blue),  $k = 20$  (red),  $m = 10$ ,  $r = 5$ ,  $P_{match} = 0.95$ . Case C: Introduction of a radical reaction term into the internal entropy production rate equation.  $DP_{50} = 0.15$ ,  $k = 30$ ,  $m = 10$ ,  $r = 5$ ,  $h = 1.0$ .

216  
217  
218  
219  
220  
221

For the last scenario, we will consider the impact of radical and other chain-type reactions. The presence of these reactions will impact  $\dot{S}_i(D)$ . At low degradation states, there will be relatively few chain-type reactions as reactive product is required to generate these reactions. As degradation state increases, more reactive product will be available, leading to an increase in the number of chain-type reactions and a corresponding increase in internal entropy production. As the amount of reactive product increases, the amount of available reactant will decrease. At some degradation state value,

222 the amount of reactant remaining will have decreased to the point that the quantity of remaining available reactant  
 223 becomes the factor limiting the reaction rate. This will result in a maximal contribution to  $\dot{S}_i$  at this condition and a  
 224 continual decrease in the magnitude of the contribution to  $\dot{S}_i$  for higher degradation states. If we assume that this  
 225 switchover occurs at a degradation state of 0.5, we can roughly approximate this behavior with the relationship

$$\dot{S}_{i,rad}(D) = \dot{S}_{max}h(D - D^2) \quad (13)$$

226 Where  $h$  is a scaling term. The total internal entropy production equation becomes

$$\dot{S}_{i,tot}(D) = \dot{S}_{max}(e^{-rD} + h(D - D^2)) \quad (14)$$

227 Combining this equation with Eqs. (8) thru (10), and solving for  $\dot{N}_{rc}$  yields the new expression

$$\begin{aligned} \dot{N}_{rc}(P) = \dot{S}_{max} & \left( e^{-rD_{P50}}(P^{-1} - 1)^{-\frac{r}{k}} \right. \\ & \left. + h(D_{P50} + k^{-1} \ln(P^{-1} - 1) - (D_{P50} + k^{-1} \ln(P^{-1} - 1))^2) \right) \left( D_{P50} \right. \\ & \left. + k^{-1} \ln\left(\frac{100}{mP} - 1\right) \right)^{-1} \frac{N_{tot}}{dS_{sys,max}} \end{aligned} \quad (15)$$

228 We can see the influence of chain-type reactions on total internal entropy production for a hypothetical scenario in Fig.  
 229 2C.2. Not surprisingly, incorporating chain-type reactions result in increased replacement rates for all performance values  
 230 (Fig. 2C.3).

231 Of note is how it is conceivable for a biomolecular pool to have considerable radical-induced damage while functioning at  
 232 a degradation state corresponding to that which maximizes cellular energetic resource ROI. In addition, it demonstrates  
 233 that it is reasonable to expect more radical-induced damage (i.e. increased degradation state) in situations where  
 234 energetic resource availability is limited and energetic resource ROI is more highly prioritized over peak performance.  
 235 Biomolecular performance levels that maximize energetic resource ROI are likely to correspond with higher levels of  
 236 biomolecular radical damage compared to the higher performance levels utilized by organisms with lower energetic  
 237 resource availability restrictions and where maximal biomolecular performance is a higher priority.

238 The naked mole-rat (*Heterocephalus glaber*) may be an example of this phenomenon in action. The naked mole-rat has a  
 239 maximum lifespan (MLSP) of ~31 years while their similar-sized cousin, the house mouse (*Mus musculus*), has an MLSP of  
 240 only ~4 years (Tacutu et al., 2012). Yet, the naked mole-rat has been found to have significantly higher levels of oxidative  
 241 stress than the house mouse (Andziak et al., 2005). Naked mole-rats also have higher levels of oxidative damage, including  
 242 increased lipid peroxidation and total protein oxidation (Andziak and Buffenstein, 2006; Andziak et al., 2006). Examination  
 243 of mitochondrial protein fractions from heart tissue found that mitochondrial proteins are also more damaged on average  
 244 in naked mole-rats compared to mice (Andziak et al., 2006). Despite this, naked mole-rats do not have superior  
 245 biochemical defenses and in fact, they do not possess an antioxidant assemblage that is any more effective or efficient  
 246 than that of mice (Andziak et al., 2005).

247 Naked mole-rats live in a hypoxic environment and have extremely low metabolic rates for their size (McNab, 1966). It has  
 248 been considered a paradox that the naked mole-rat exhibits high levels of oxidative stress and protein damage while  
 249 having such a long lifespan compared to similarly sized, closely-related species. I believe that not only is this not  
 250 paradoxical, it is actually predictable and straightforward to explain. The first piece of the puzzle is explaining why oxidative  
 251 damage levels are substantially elevated in the naked mole rat. The naked mole-rat's limited access to oxygen restricts  
 252 the rate of cellular ATP production via oxidative phosphorylation, thereby requiring that a very high priority be placed on  
 253 the energetic ROI of cellular processes. As demonstrated, biomolecular performance levels that maximize energetic ROI  
 254 are likely to correspond with higher loads of radical (oxidative) damage. Related species that are not as energetic resource  
 255 restricted, for example the house mouse, may operate at higher biomolecular performance levels (to help maximize

athletic ability, growth rate, etc.) which will correspond to lower levels of oxidative, and other, damage present in their biomolecular pools. Therefore, it should not be surprising that the naked mole-rat has elevated levels of oxidative damage, which is indicative of a higher biomolecular degradation state. The second part of solving the naked mole-rat paradox is explaining why their high biomolecular degradation states do not determine, nor adversely affect, MLSP. This will be addressed in section 7.5.

### 3 Combatting Degradative Internal Entropy Production within an Organism

Within every living cell of an organism and at any given time, a myriad of metabolic and catabolic thermodynamic processes that have no direct impact on biomolecular fidelity are occurring. By utilizing a discrete system defined to include only the relevant factors, the previous analysis disregards these processes and incorporates only those that contribute to, or combat, biomolecular degradation.

From examining Eq. (5) we can see that in order for an organism to avoid a permanent increase in total entropy (i.e. to maintain a steady-state in terms of the level of biomolecular degradation) it must be capable of producing sufficient negative entropy  $d_e S/dt$  to offset the degradative internal entropy produced  $d_i S/dt$ . Many of the mechanisms utilized for this function have been characterized. These mechanisms include biomolecular expression systems, molecular chaperones, degradation systems (proteasomes, lysosomes) and DNA repair enzymes, to name a few. It is clear that organisms would be unable to maintain (or even attain) a developed state without biomolecular repair and replacement mechanisms (Zimniak, 2008). At the cellular level, stem cells and mitotic cell division, together with apoptosis, provide a means to replace entire cells and, in some organisms, even tissues—thereby preserving (or at least attempting to preserve) the degradation state in these populations.

Consideration should also be given to the factors that influence the rate of degradative internal entropy production  $d_i S/dt$  within a system as this will determine the amount of negative entropy required to satisfy a particular steady-state condition. Reducing the rate of internal entropy production will decrease the amount of negative entropy needed, and therefore the energetic investment required, to preserve homeostasis. The rate of internal entropy production is proportional to the sum of the contributions from all possible thermodynamic potentials acting on a biomolecular ensemble. This includes chemical reactions, heat, mass, momentum transfer, and other effects. The magnitudes of the thermodynamic potentials depends on the strengths of the respective “damage-inflicting” forces (which may vary significantly with time, particularly when a biomolecule is in an active state) and the ability of an organism’s biomolecular structures to resist these forces.

The rate of degradative internal entropy production will tend to decrease with increasing degradation state. The steady-state condition that is achieved in a system will be the state where the rate of negative entropy production from repair and replacement is equivalent in magnitude to the rate of degradative internal entropy production. Regardless of the degradation state of a biomolecular ensemble, the pool will consist of biomolecules in various states of degradation. Perfect fidelity is not achievable in any biomolecular ensemble. (As degradation state decreases, less and less negative entropy will be produced by each biomolecular repair/replacement event; therefore, infinite resources would be required to attain perfect fidelity, i.e. a degradation state of zero.)

#### 3.1 Optimization of Biomolecular Structure

Biomolecular structural optimizations can modulate the effects of degradative thermodynamic potentials by resisting biomolecular state changes. As an illustration, consider how a protein may be affected by hydroxyl radicals, which are capable of generating very strong chemical reaction potentials. The amino acids cysteine and methionine are particularly vulnerable to oxidation reactions (Suto et al., 2006). The inclusion of cysteine in a protein could be avoided, and another amino acid substituted, to protect from aberrant structural modifications due to hydroxyl radical reactions. Alternatively, cysteine could be implemented in non-critical locations within a protein as a sacrificial means to scavenge free radicals and help prevent damage to more critical domains. It should be considered, however, that a cysteine or methionine residue in a particular location could bestow an advantageous trait to a protein (improved catalytic activity, energy

utilization, substrate specificity, etc.)—thus any benefits to inclusion must be weighed against the costs associated with the increased susceptibility to insult.

Some of the other ways that altered biomolecular structure could help resist damage-inducing thermodynamic forces include modifications that improve resistance to undesirable hydrophobic interactions capable of generating conformation changes and structural variations that resist temperature-induced denaturation. These biomolecular modifications could result in a deleterious increase in the physical size of the biomolecule or otherwise be disadvantageous, such as limiting the rate at which a biomolecule can perform its intrinsic biological function. Alterations to biomolecular structure could also affect the amount of energetic resources required for the production/replacement/repair of a biomolecule.

On the other hand, high durability/resiliency or low rates of internal entropy production may be sacrificed by structural alterations that maximize the specific rate of work that can be performed by a biomolecule. An example of this is discussed in detail in section 7.4, where it is demonstrated that the polyunsaturated fatty acid content levels of membrane lipids, which varies across species, likely represent evolved tradeoffs between the specific rate of biomolecular work that can be performed by transmembrane proteins and the rate of internal entropy production.

Clearly, biomolecule structural optimization is a multifactorial compromise. It is apparent that through evolution, biomolecular arrangements are “tested” iteratively and through selective pressure converge towards arrangements that provide the appropriate balance between these factors such that fitness is maximized in the species.

### 3.2 Microenvironment Optimization

Also relevant to the rate of degradative internal entropy production within an organism are the microenvironmental conditions, as these will define the magnitude of the degradative thermodynamic forces acting upon biomolecules. Temperature, which is a measure of the average velocity of molecules, has a significant effect on reaction velocities and bond forces/energies. All else being equal, lower temperature will increase molecular stability and reduce the rate of internal entropy production. However, higher temperatures will produce increased kinetic energy transfer during intermolecular collisions. This will increase the specific rate of biomolecular work that can be performed. An evolved compromise is established between these and other temperature-dependent factors such that the defined body temperature represents that which maximizes fitness.

Other attributes of a microenvironment may have less obvious, and even somewhat counterintuitive, ramifications. For example, conditions of higher oxidative stress are expected to increase the magnitude of the degradative thermodynamic forces. At first glance, this may seem purely undesirable from a biological standpoint. Yet, it was demonstrated earlier how arrangements that highly prioritize energetic resource ROI may exhibit elevated levels of oxidative stress.

### 3.3 Biomolecular Work Rate can Influence the Magnitude of Degradative Internal Entropy Production Rates

Consider the state of biomolecules when actively performing their intrinsic biological function. The process taking place will involve a transfer of energy. This will result in a brief period of time when energy is highly concentrated in close proximity to the biomolecule. The magnitude of the thermodynamic potentials contributing towards biomolecular degradation will be amplified during this time. For this reason, internal entropy will be produced at an increased rate when biomolecules are in the active state.

All else being equal, a biomolecular pool that is inactive (not performing any intrinsic biological function) will have lower rates of degradative internal entropy production than one where biomolecules spend a significant percentage of time in the active state. The average rate of internal entropy production can be approximated by

$$\dot{S}_i = (100 - p)\dot{S}_{i,static} + p\dot{S}_{i,active} \quad (16)$$

Where  $\dot{S}_{static}$  is the degradative internal entropy production rate of the system when biomolecules are not performing any intrinsic biological function,  $\dot{S}_{active}$  is the rate of internal entropy production when all biomolecules are actively

performing their intrinsic biological functions, and  $p$  represents the percentage of time the average biomolecule spends in the active state. It should be evident that configurations where biomolecules spend more time in the active state (work rate is higher) will require increased rates of biomolecular repair/replacement to preserve the steady-state condition.

### 3.4 Extrapolation of Degradation State Concepts to Larger Physical Scales

The system described in sections 2.1-2.2 was developed using biomolecules as the object of interest. Many of the same concepts can be applied to larger physical scales. For example, organelles are repaired and replaced, and face damage due to degradative internal entropy production in much the same manner as the individual biomolecules that they are assembled from. Mitotic cell populations can also be considered as described earlier, with individual cells utilized as the expressed (replicating) unit.

## 4 Preservation of DNA Molecular Information

Most biomolecules can be replaced directly by expression of a genetic sequence or are the metabolic products of expressed biomolecules. The performance of these biomolecular pools can be preserved through replacement by the successful expression of the appropriate genetic sequence or the relevant metabolic processes, and the removal or repair of any dysfunctional counterparts. With a given rate of turnover and assuming intact expression machinery, the preservation of biomolecular performance within a cell becomes dependent on: (1) the integrity of the genetic material responsible for biomolecular expression, and (2) the cell's ability to remove all dysfunctional biomolecules. It is suggested that, while the last requirement should not be trivialized, this is a very attainable objective: That is to say, the specificity of degradation pathways can afford to err on the side of casting a wider net to help ensure that any dysfunctional biomolecule is eventually recognized since these biomolecules can be resynthesized anew. Indiscriminate purging of cellular content would eventually dispose of any unwanted products—it is much easier to discard in excess to rid of waste than it is to preserve ultimate integrity in a structure. For these reasons, integrity preservation in biomolecules that cannot be expressed, the genetic-encoding biomolecules—DNA, warrants further scrutiny.

### 4.1 Decreases in Mutual Information of DNA Molecules

Combatting degradative internal entropy production via replacement requires intact information-containing biomolecules encoding for both the biomolecules being replaced and the expression machinery. DNA molecules contain the information encoding for all other classes of biomolecules, either directly or as the metabolic products of expressed products. Furthermore, DNA molecules hold the instructions for all cellular processes. Clearly, DNA integrity is critical for preservation of organismal state.

Like all molecules within an organism, DNA is subject to molecular insults resulting from internal entropy production and will incur an insult rate proportional to the damage-inflicting thermodynamic potentials of the microenvironment. DNA molecules are unique among classes of biomolecules as they depend on their own integrity for their replacement. In order to maintain genetic biomolecular fidelity, DNA molecular insults must be repaired such that the encoded information is preserved intact.

There are a number of ways that DNA can be damaged resulting in base alterations, cross-linking, strand breaks, and other modifications (De Bont and van Larebeke, 2004). Consider some of the possible outcomes when a double-stranded DNA molecule has suffered a single base excision:

1. The damage is properly repaired by endogenous base excision repair (BER) mechanisms
2. The damage is improperly repaired by BER mechanisms
3. An additional insult occurs at this site before repair can take place
4. No repair or further damage occurs for a length of time

DNA replication takes place far from thermodynamic equilibrium. The accuracy of DNA polymerase is largely dependent on the differences in the free energy released or absorbed by the various possible base-pairing combinations of incoming nucleotides to template strand nucleotides (Arias-Gonzalez, 2012). Utilizing thermodynamic theory, polymerase error

384 rates have been estimated and demonstrated to be non-zero, in alignment with empirical findings. Although single-base  
385 excision damage is very often repaired by BER (scenario 1), restoring redundancy and preventing changes in stored  
386 information, there is always a possibility that a replication error will occur. Additionally, repair machinery must translocate  
387 to the site of the insult and perform the repair. This will not occur instantaneously. If the site is further damaged before  
388 repair takes place then information loss could occur.

389 Only a single level of redundancy is definite at all DNA base pairs—that provided by the pairing base on the opposite  
390 strand. Even an insult restricted to a single base will deplete this redundancy and can lead to a permanent change in DNA  
391 information. This does not imply that more serious insults are not repairable. For example, double-stranded breaks may  
392 be completely repaired by homologous recombination in some cases, but there is no guarantee that a homologous site  
393 will exist or that the repair will be successful.

394 Once a DNA molecule has suffered an insult, there is no means to guarantee restoration of redundancy and indefinite  
395 preservation of data. *As the second law stipulates that molecular insults are inevitable, the genetic data stored in DNA*  
396 *molecules must change with time. The concept of “perfect” DNA repair is flawed and unattainable.*

397 The second law is therefore causally implicated in mandating that losses in mutual DNA information will occur over time.  
398 This same conclusion has been drawn previously utilizing information theory; Yockey (1974) suggested that the noisy-  
399 channel coding theorem stipulates that, in the right conditions, the stability of the genetic message can be such that the  
400 error is “arbitrarily small” but that the probability of error must always be non-zero.

401 Permanent losses in genetic data are typically discussed in terms of discrete mutations or the rate at which mutations are  
402 occurring (Sniegowski et al., 2000). An alternative way to assess these losses is to consider the amount of DNA-encoded  
403 information that is preserved using the concept of mutual information<sup>2</sup>, which is a measure of the amount of information  
404 shared between two datasets. This provides a means to quantitate the difference between the data stored in DNA  
405 molecules, be it the same DNA molecule at different points in time or between different DNA molecules. Methods for  
406 calculating the mutual information between DNA sequences have been discussed elsewhere (Demirel, 2014b; Grosse et  
407 al., 2000; Mahony et al., 2007). As genetic data must change with time, the mutual information of a discrete, non-  
408 replicating DNA molecule must also decrease with time; therefore, the rate of change in mutual information of DNA  
409 molecules will be negative and can be represented by

$$MIR_{DNA} = \frac{I_{DNA}}{T} < 0 \quad (17)$$

410  $I_{DNA}$  represents the amount of mutual information between the data stored in the DNA molecule at any initial time and  
411 after a period of time  $T$  has passed.

## 412 4.2 Applicability of the Degradation State Concept to DNA Molecular Ensembles

413 Synthesized biomolecules depend on the integrity of DNA for their correct expression. If the full integrity of DNA is  
414 preserved then, theoretically, negative entropy could be produced at a rate that results in a steady state of performance  
415 in any expressed biomolecular pool (this was discussed in section 2.2). Since DNA molecules rely on their own integrity for  
416 identical replacement, this biomolecular replacement scenario is not applicable to DNA molecules.

## 417 4.3 Considerations for Mutual DNA Information Preservation in Different Cell Types

418 For a sexually reproducing multicellular organism, the zygote contains the truest representation of the parentally derived  
419 genetic data anywhere in the individual and of any stage in life, i.e. the mutual DNA information between parent and

---

<sup>2</sup> Although thermodynamics is useful for examining the causes of DNA molecular insults and assessing the magnitude of the damage-inducing potentials, concepts from information theory are more appropriate for analyzing DNA integrity quantitatively. So as to not confuse the fields, any use of the term entropy in this manuscript can be assumed to refer to thermodynamic entropy. Direct reference to Shannon entropy is avoided.

420 offspring is maximal in the zygote. The informational integrity of an organism's DNA at any later point in life can be  
421 quantified by comparing to this baseline standard.

422 Let us consider how the requirements for preservation of mutual DNA information are likely to vary over the course of an  
423 individual multicellular organism's life and as a function of cell type. Somatic cellular function must remain at a sufficiently  
424 high level for a certain minimum period of time in order for the organism to successfully reproduce. Selective pressure for  
425 preservation of function begins to decrease as an individual ages past reproductive maturity (Hamilton, 1966; Medawar,  
426 1952). The progeny of adult stem cells are the replenishment source for somatic cells; therefore, it could be predicted that  
427 adult stem cells, on average, must retain a higher degree of mutual DNA information than non-stem somatic cells for any  
428 given point in an individual's lifespan.

429 Singular events that generate losses in mutual DNA information (i.e. mutations) most commonly have little or no effect  
430 on offspring fitness. Some mutations will result in decreases in fitness while only the rare insult produces increased fitness  
431 (Eyre-Walker and Keightley, 2007; Fisher, 1930). The distribution of these fitness effects can vary considerably between  
432 organisms. Evolutionary pressures must be sufficiently strong to select against "negative" mutations in order to prevent a  
433 loss of fitness.

434 The redundancy provided by diploidy/polyploidy, gene duplication, and functional overlap likely provides a degree of  
435 robustness that enables non-germ cells to tolerate a certain level of mutual DNA information loss with minimal  
436 performance impact on the individual (Medvedev, 1972; Plata and Vitkup, 2013; Riggs, 1994; Yockey, 1974). Similar levels  
437 of damage would be more detrimental in germ cells as they would propagate to all cells of the progeny. Therefore, we  
438 can confidently state that the average mutual DNA information retained by germ cells must be greater than that of adult  
439 stem cells at the time of reproduction, which in turn must be greater than the mutual DNA information retained in non-  
440 stem somatic cells at the time of reproduction. This relationship can be written

$$\bar{I}_{DNA}(zyg; som_{rep}) < \bar{I}_{DNA}(zyg; stem_{rep}) < \bar{I}_{DNA}(zyg; germ_{rep}) \quad (18)$$

441 Where  $\bar{I}_{DNA}(zyg; som_{rep})$  represents the average mutual information retained between non-stem somatic cells at the  
442 time of reproduction and the information originally contained within the zygote,  $\bar{I}_{DNA}(zyg; stem_{rep})$  is the average  
443 mutual information between adult stem cells and the zygote, and  $\bar{I}_{DNA}(zyg; germ_{rep})$  is the average mutual information  
444 between germ cells and the zygote.

445 In addition to the redundancy within DNA base-sequences, which provides some level of tolerance for loss of mutual DNA  
446 information, alternative redundancy strategies could help to preserve the mutual DNA information in somatic cells. One  
447 such approach is to utilize multiple copies of DNA, as could be provided by cellular populations together with strategies  
448 that select for cells containing DNA molecules that retain the most mutual DNA information. This could be accomplished  
449 by the collective pooling and segregation of population of cells, together with specialized, rigid insult-detection and data  
450 preservation strategies.

451 In agreement with Eq. ( 18 ), organisms appear to come closest to preserving mutual DNA information in germ cells. This  
452 is the result of evolved strategies that place extraordinary emphasis on the preservation of both nuclear and mitochondrial  
453 genetic data in germ cells. The fidelity of mtDNA is effectively reset during oogenesis through a genetic bottlenecking  
454 process that selects for the healthiest mtDNA and eliminates less efficient, mutated mtDNA molecules (Lee et al., 2012;  
455 Wai et al., 2008); likewise, nuclear DNA is subject to very strict insult detection mechanisms (Bailly and Gartner, 2013;  
456 Hochwagen and Amon, 2006; Jaramillo-Lambert et al., 2010). Germ cells are more likely than somatic cells to undergo  
457 apoptosis when DNA damage is detected, rather than attempt to repair the damage (which often results in the loss of  
458 mutual DNA information). Germ cells are also sequestered in a protected microenvironment with various support cells  
459 whose sole function is the support and maintenance of the germ cells (Schulz et al., 2002).

460 Assessing the situation from a thermodynamic perspective would suggest that the rate of mutual DNA information loss  
461 can be minimized by keeping the thermodynamic potentials acting on the DNA molecules as low as possible. Primordial

462 germ cells (gametogonia), as well as oocytes and spermatocytes, have relatively low rates of oxygen consumption (Brinster  
463 and Troike, 1979). Most adult stem cells are quiescent and frequently prioritize glycolysis over oxidative phosphorylation  
464 for meeting ATP requirements, resulting in relatively low levels of free radicals and ROS (Rossi et al., 2008; Shyh-Chang et  
465 al., 2013; Suda et al., 2011; Tothova et al., 2007) and lower mtDNA replication rates. This supports the notion that  
466 manipulation of thermodynamic potentials acting on DNA molecules through modulation of cellular processes and  
467 manipulation of the microenvironment is a realizable and effective means of reducing the rate of mutual DNA information  
468 loss in cells.

469 The information retained in the gamete common to the parental zygote  $I_{DNA}(zyg; gametes)$  will depend not only on the  
470 inevitable germ cell mutual information losses due to internal entropy production but also those losses resulting from  
471 genetic recombination during meiosis  $\Delta MI_{recom}$ :

$$I_{DNA}(zyg; gametes) = I_{DNA}(zyg; germ_{rep}) - \Delta MI_{recom} \quad (19)$$

472 Since advantageous mutations are rare, loss of mutual information between parent and offspring will result in a loss of  
473 fitness of the species absent effective selection mechanisms. The proportion of progeny with lower fitness must not be so  
474 excessive that evolution cannot successfully select for the neutral and higher fitness offspring. Thus, a minimal limit  
475  $I_{DNA}(zyg; gametes_{min})$  is effectively placed on the mutual information of the progeny:

$$I_{DNA}(zyg; gametes) \geq I_{DNA}(zyg; gametes_{min}) \quad (20)$$

476 Germ cells must be maintained with adequate redundancy levels and a sufficiently stringent support strategy providing  
477 fidelity preservation to satisfy Eq. (20). In this way, mutual DNA information is largely preserved generation-to-generation.

478 There is a direct correlation between the lifetime risk of cancer in a tissue and the number of divisions of the stem cells  
479 maintaining that tissue (Tomasetti and Vogelstein, 2015). It is clear that the strategies used to preserve stem cell integrity  
480 do not match the fidelity achieved by germ cell preservation strategies. Since the preservation of stem cell mutual DNA  
481 information requires dedicated niches with specialized microenvironments, there must be associated negative fitness  
482 costs to scaling these niches excessively—even though doing so may result in further reductions in the rate of mutual DNA  
483 information loss in the cell type in question. For this reason, an organism's stem cell niches must be configured to  
484 adequately support the respective target tissue over the lifespan of the individual, but not be so unnecessarily  
485 burdensome that they lower species fitness.

## 486 5 Establishing a Connection between Thermodynamic, Information, and Evolutionary Theory in Biological Aging

487 Modern nonequilibrium thermodynamic theory stipulates that all biomolecules must suffer degradative insults due to the  
488 production of internal entropy within any system that is not at equilibrium. Biological repair and replacement mechanisms  
489 cannot guarantee that mutual DNA information is preserved or restored in individual cells. As a result, cellular mutual DNA  
490 information must decrease with time. We will next examine what repercussions the irreversible loss of mutual DNA  
491 information in discrete cells could have on both the individual and the species as a whole.

### 492 5.1 In the Individual

493 Most germline mutations are neutral or detrimental to fitness, with only the rare mutation being beneficial. It follows that  
494 mutations occurring in the somatic cells of an individual organism would exhibit this same pattern with regards to their  
495 contribution towards the performance of the individual. Therefore, without selection for only those changes that are  
496 neutral or beneficial to the individual, mutual DNA information loss in somatic cells would reduce individual performance  
497 with time, i.e. organisms will age.

498 Although evolution and selection are traditionally thought of as occurring between generations of a species, similar  
499 concepts are in play in the life and death cycles of the cells of a multicellular organism during an individual's life. Single  
500 cells are the replicating unit in this scenario. For an individual multicellular organism containing cells undergoing mitosis,  
501 natural selection will occur on the cellular level and favor those cells that display the highest fitness. These configurations  
502 may not necessarily be the most beneficial to the individual multicellular organism as a whole. As natural selection will



503 always be present at the level of the replicating unit (Baum et al., 2013; Szathmary and Smith, 1995)—cells in these cases—  
504 the individual must rely on imperfect innate biological mechanisms that attempt to select for only those configurations  
505 that do not reduce the viability of the individual.

506 The only way to guarantee that the mutual DNA information in a cell is perfectly preserved is by comparing the DNA base  
507 sequence to a known-good reference sequence base-by-base. This master template does not exist in any organism and  
508 there is no means for an organism to perform a comparative DNA sequence analysis. Cells with undesirable base-sequence  
509 modifications must be detected by phenotype. In the case of more severe damage, the cell is often able to detect the  
510 damage and initiate apoptosis (Zhou and Elledge, 2000). At the other end of the scale, singular mutation events may  
511 exhibit very mild or no detectable undesirable phenotype; these cells are likely to avoid detection completely. For  
512 example, mutations whose effect is masked by redundancy are likely to have no detectable phenotype. A mutation may  
513 also occur in a region of the genome that is not currently active or relevant to the particular cell; as a result there may be  
514 no immediate negative phenotype. This genomic region could become active at some later time, at which point the  
515 mutation may have already spread to the cell’s progeny.

516 Even in the most ideal embodiment, eventually the effects of multiple mutation events must decrease individual viability;  
517 at some point, removing cells determined by biological mechanisms to be undesirable will no longer provide reprieve from  
518 losses in viability as cellular mutual DNA information losses will continue to increase until all cells approach the detectable  
519 threshold of dysfunction. At this point, there would be no ‘good’ configurations to select for to replace those cells  
520 determined to be undesirable, even if such cells could be detected with complete accuracy.

521 For a period of time, genetic redundancies would likely be able to mostly compensate for the loss of mutual DNA  
522 information in an individual—essentially delaying an aging phenotype (Fig. 3a). A second line of defense is provided by  
523 innate mechanisms that identify specific types of cellular dysfunction and eliminate cells displaying those phenotypes  
524 (Zhou and Elledge, 2000). Once the utility of these redundancies is expended and ever-increasing numbers of  
525 compromised cells circumvent innate detection mechanisms, the individual will no longer be able to avoid a loss of  
526 viability. This resulting dysfunction becomes progressively worse with time. *As no existing, or theoretical, biological means*  
527 *has been demonstrated or postulated to be capable of selecting only for those changes in cellular DNA information that*  
528 *are neutral or beneficial to the individual, it is inevitable that all individual organisms must age.* Due to the impossibility of  
529 an organism achieving an indefinitely sustentant phenotype, the claim by Hamilton (1966) that senescence arises inevitably  
530 due to declining selection pressure with age at the level of the species, while not challenged here, is redundant.

531 Additionally, no mechanism selecting for changes benefiting an individual multicellular organism could prevent natural  
532 selection from also occurring at the level of the individual cell<sup>3</sup>. Therefore, cancer is also inevitable in any individual  
533 organism given sufficient time—despite the fact that cancer has yet to be detected in a small number of studied species.  
534 (The naked mole-rat has long been considered one such species. This was challenged in a recent article where cancer was  
535 reported in the naked mole-rat for the first time (Delaney et al., 2016)).

## 536 5.2 In the Species

537 As previously discussed, gametes must suffer losses in mutual DNA information with time. The total loss suffered between  
538 a gamete and the zygote that gave rise to the individual that produced the gamete will generally be less than that which  
539 occurs in somatic cells of an individual due to mechanisms that enhance gamete quality (Bailly and Gartner, 2013;  
540 Jaramillo-Lambert et al., 2010). By limiting the amount of loss present in the gamete to a level low enough that selection  
541 for neutral and higher fitness offspring is possible, the fitness of the species can be preserved and even increase. Natural  
542 selection is the only means by which inevitable mutual DNA information losses can be prevented from generating  
543 mandatory fitness losses in the species.

---

<sup>3</sup> Or from selection occurring on a subcellular level amongst DNA-containing organelles (mitochondria and chloroplasts)

544 Since evolving to maximize species fitness involves genomic changes, configurations that maximize fitness under new  
545 selective pressures may generate mutual DNA information losses in the species that are greater than conditions where  
546 selection is nearly absent (as calculated by the average mutual DNA information loss between parent and offspring,  
547  $\bar{I}_{DNA}(zyg; gametes)$ ). Fluctuating selective pressures prevent mutual DNA information loss from being minimized in the  
548 species.

549 Consider, however, what would happen if selective pressures were held constant. The rate of mutual DNA information  
550 loss will begin at some initial value as fitness of the species increases at some positive rate (Fig. 3b). Through the course  
551 of many generations, fewer configurations will be available that are capable of producing higher fitness than the current  
552 configuration. As a result, the rate of mutual DNA information loss must decrease and the rate of fitness increase becomes  
553 less rapid across generations. With fewer “positive” mutations available and selection tending to eliminate “negative”  
554 mutations, the rate of mutual DNA information loss in a species under static selective pressure could be much lower than  
555  $\bar{I}_{DNA}(zyg; gametes)$ . In conditions where selective pressure were static, fitness would eventually approach a theoretical  
556 limit as the rate of mutual DNA information loss approaches zero.

557 Since conditions of perfectly static selective pressure are not realizable and variations in selective pressures result in  
558 adaptive genetic changes, species mutual DNA information must decrease with time. This logic establishes a  
559 correspondence between the directionality of the second law and mutual DNA information loss in both individuals of a  
560 species and species themselves.

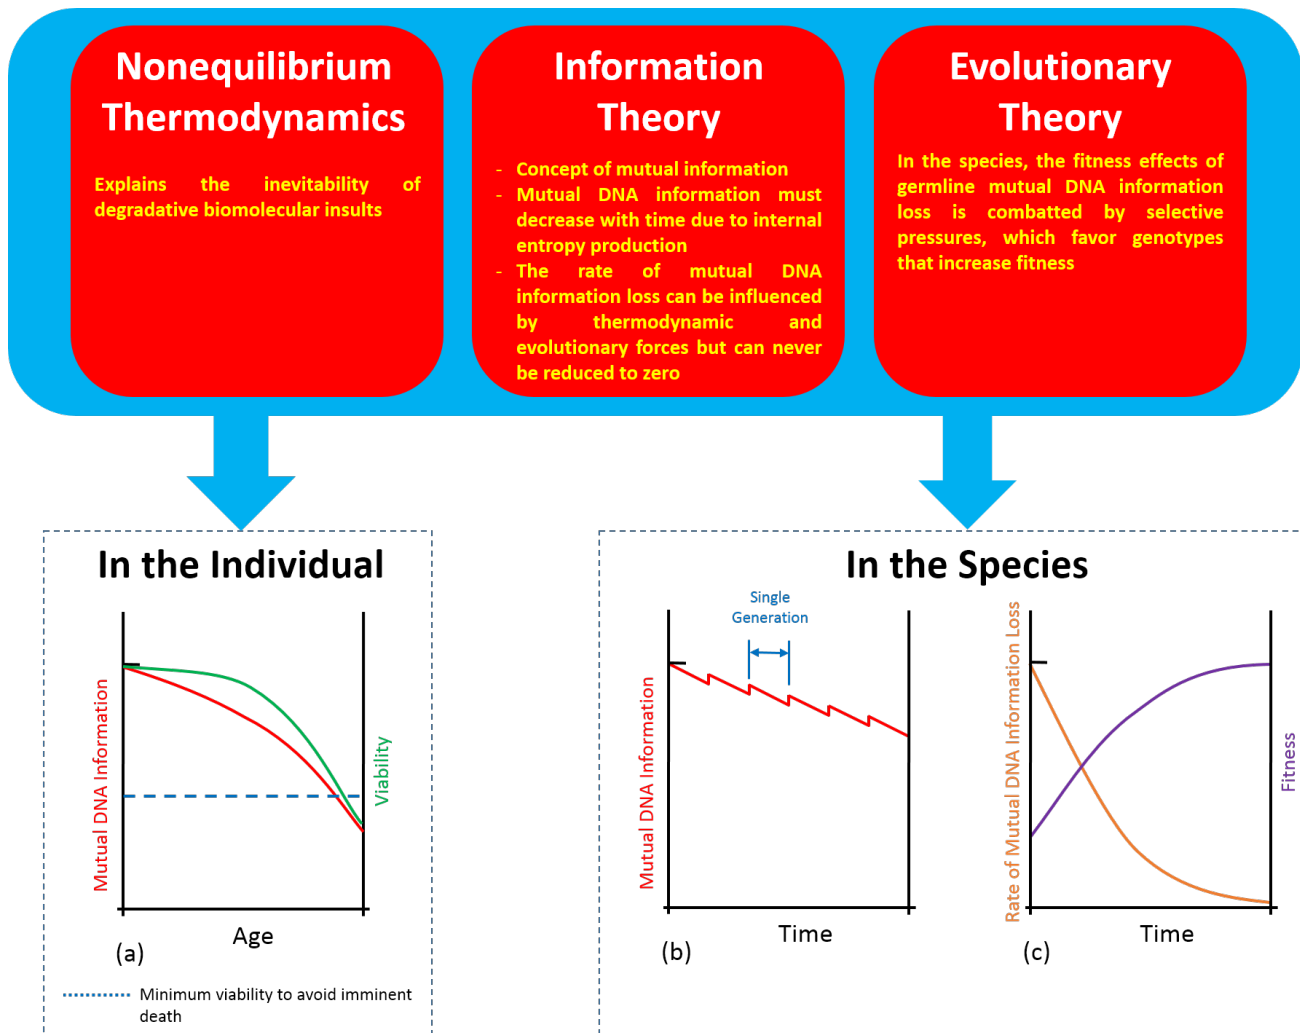

Fig. 3. The proposed connection between thermodynamics, information, and evolutionary theory in generating mandatory mutual DNA information losses in both the individual and the species. (a) Although a correlation between individual viability and somatic cell mutual DNA information loss is predicted, genetic redundancies and other compensating mechanisms may attenuate reductions in individual viability due to mutual DNA information losses. (b) The average mutual DNA information in cells of all individuals of a species will decline as a generation ages. This loss can be largely reverted in subsequent generations by portioning germ cells in conditions optimized for preservation of genetic data. (Generations have been aligned for illustration purposes.) (c) In conditions of static selective pressures, the rate of mutual DNA information loss is predicted to decrease as fitness approaches a maximum value.

## 6 Examining Degradation Increases in Aging Individuals

Living organisms are highly ordered entities, yet they exist in a state far from thermodynamic equilibrium. As a result, degradative processes will occur within organisms as internal entropy is produced. Cellular mechanisms work towards counteracting these damaging effects, establishing what is very close to being a steady state (over a limited time-window) in terms of preservation of biomolecular integrity. Despite these efforts, the overall degradation state of an organism increases with age.

### 6.1 Energetic Expenditures towards Biomolecular Repair and Replacement – a Paradox?

Proteins account for the majority of biomolecules within a cell. The rate of total protein synthesis has been empirically determined for a number of species. Smaller organisms synthesize proteins at higher rates than larger species (Fig. 4a). Protein synthesis in mice is estimated to occur at a rate sufficient to replace total body protein mass every 5.27 days, while the same occurs in man approximately every 31.07 days (Table 1). Of course, individual protein turnover rates can vary widely protein-to-protein, from minutes to years (Hetzer, 2013).

Over the course of a lifetime, a long-living human will synthesize enough protein to replace total body protein mass 1439 times over (Table 1). Let us assume for the moment that degraded/dysfunctional proteins are “accumulating” due to an insufficient amount of energy being spent on repair and replacement, as suggested by the disposable soma theory of aging (Kirkwood, 1977; Kirkwood and Holliday, 1979; Kirkwood and Rose, 1991). Considering a worst-case scenario where all of the protein in an aged human is in need of replacement, it would only require an estimated 0.07% increase in daily resource investment in protein synthesis to offset the average daily loss of protein quality with age. This translates to 0.23 calories per day<sup>4</sup>. With a daily dietary intake of 2500 calories, this is only 0.0092% of daily energy intake. Although this figure does not include the energetic repair and replacement costs of all classes of biomolecules, the total amount of

Table 1. Protein Synthesis Rates, Number of Days to Turnover Total Body Protein Mass, and Number of Turnovers per Lifespan for Different Metazoan Species

| Species      | BW (kg) | Protein synthesis |                 |                                 | Body Protein Composition (%) | Days to Replace Total Body Protein Mass | Maximum Lifespan (years) <sup>4</sup> | Turnovers Per Life | Synthesis Rate Reference    |
|--------------|---------|-------------------|-----------------|---------------------------------|------------------------------|-----------------------------------------|---------------------------------------|--------------------|-----------------------------|
|              |         | g/day             | g/kg BW per day | g/kg <sup>0.75</sup> BW per day |                              |                                         |                                       |                    |                             |
| Honey possum | 0.01    | 0.2798            | 29.15           | 9.12                            | -                            | 6.86                                    | 2.00                                  | 106.4              | Bradshaw and Bradshaw, 2009 |
| Mouse, small | 0.02    | 0.768             | 38.40           | 14.44                           | 20.25 <sup>1</sup>           | 5.27                                    | 4                                     | 276.9              | Garlick and Marshall, 1972  |
| Rat          | 0.35    | 7.7               | 22.00           | 16.92                           | 20.81 <sup>1</sup>           | 9.46                                    | 3.80                                  | 146.6              | Reeds and Harris, 1981      |
| Rabbit       | 3.6     | 33                | 9.17            | 12.63                           | 19.44 <sup>1</sup>           | 21.20                                   | 9.00                                  | 154.9              | Reeds and Harris, 1981      |
| Cat (HP)     | 4.8     | 31.4              | 6.54            | 9.68                            | 21.81 <sup>1</sup>           | 33.34                                   | 30.00                                 | 328.4              | Russell et al., 2003        |
| Dog          | 10.2    | 123.37            | 12.10           | 21.62                           | 22.06 <sup>1</sup>           | 18.24                                   | 24                                    | 480.2              | Everett et al., 1977        |
| Sheep        | 63      | 351               | 5.57            | 15.70                           | 16.00 <sup>2</sup>           | 28.72                                   | 22.80                                 | 289.8              | Reeds and Harris, 1981      |
| Man          | 67      | 310               | 4.63            | 13.24                           | 14.38 <sup>3</sup>           | 31.07                                   | 122.50                                | 1439.2             | Pacy et al., 1994           |
| Cow          | 575     | 1740              | 3.03            | 14.82                           | 22.50 <sup>1</sup>           | 74.35                                   | 20.00                                 | 98.2               | Reeds and Harris, 1981      |

Note: Body protein concentration for honey possum not available, used 17% for “days to turnover” calculation. <sup>1</sup>Moulton, 1923.

<sup>2</sup>Reid et al., 1968. <sup>3</sup>Mitchell et al., 1945. <sup>4</sup>Tacuta et al., 2012.

<sup>4</sup> Protein synthesis requires approximately 4.5 kJ of energy per gram of protein (Waterlow, 2006, p.170). Producing 310 g/day of protein (human rate) equates to roughly 1395 kJ or 333 Cal per day; 0.07% of this value is 0.23 Cals per day.

582 protein dedicated to translation is 2-15 times greater than  
583 that dedicated to transcription and DNA maintenance  
584 (Liebermeister et al., 2014)—protein synthesis represents  
585 a significant fraction of the total energy spent by an  
586 organism on biomolecular repair and replacement. In light  
587 of the very small additional investment predicted to be  
588 needed to offset the loss of protein quality in the  
589 described scenario, the disposable soma theory's claim  
590 that aging is caused by an energetic underinvestment in  
591 repair and maintenance resulting in an accumulation of  
592 damage (Kirkwood, 1977; Kirkwood and Holliday, 1979;  
593 Kirkwood and Rose, 1991) is difficult to accept. Although  
594 the numbers above are just estimates, even if they were  
595 off by two orders of magnitude this argument would still  
596 hold merit. In addition, organisms that turnover their  
597 proteins more frequently have shorter lifespans—not  
598 longer lifespans (Fig. 4b). Smaller organisms turnover  
599 protein at a higher rate than larger organisms (Fig. 4a) and  
600 have shorter lifespans (Austad, 2005; Calder, 1984; de  
601 Magalhães et al., 2007).

602 Caloric restriction has been demonstrated to extend  
603 lifespan in some organisms. This also appears to  
604 contradict the disposable soma theory. Proponents of the  
605 disposable soma theory have attempted to explain this  
606 “paradox” by suggesting that caloric restriction generates  
607 a shift in resources away from reproduction and towards  
608 somatic maintenance (Shanley and Kirkwood, 2000). While extended caloric restriction has been found to attenuate the  
609 reduction in protein synthesis in muscle tissue that occurs with advanced age in mice (Zangarelli et al., 2006), recent  
610 studies have demonstrated that caloric restriction does not produce a direct increase in the rate of mixed protein synthesis  
611 in mice (Miller et al., 2013), nor is mitochondrial protein synthesis significantly affected by caloric restriction in liver, heart,  
612 or skeletal muscle (Miller et al., 2011). Although it has been proposed that caloric restriction does indeed increase protein  
613 turnover (Tavernarakis and Driscoll, 2002), an examination of supporting data suggests that the decreased attenuation in  
614 protein synthesis with age resulting from extended caloric restriction was interpreted as an increase in protein turnover  
615 in direct response to caloric restriction—yet these are two distinct phenomena with very different implications.

616 A corollary of the disposable soma theory suggests that an increase in the amount of energy available to an organism  
617 would allow it to devote more resources towards somatic maintenance and thus delay aging; however, studies  
618 demonstrating that increased caloric intake increases lifespan do not exist—yet it is well-known that obesity leads to  
619 increased rates of aging and diabetes (Ahima, 2009). It is clear that energetic expenditures towards repair and replacement  
620 alone cannot explain the differences in longevity between species nor does it provide a solid rationale for why aging must  
621 occur in the first place.

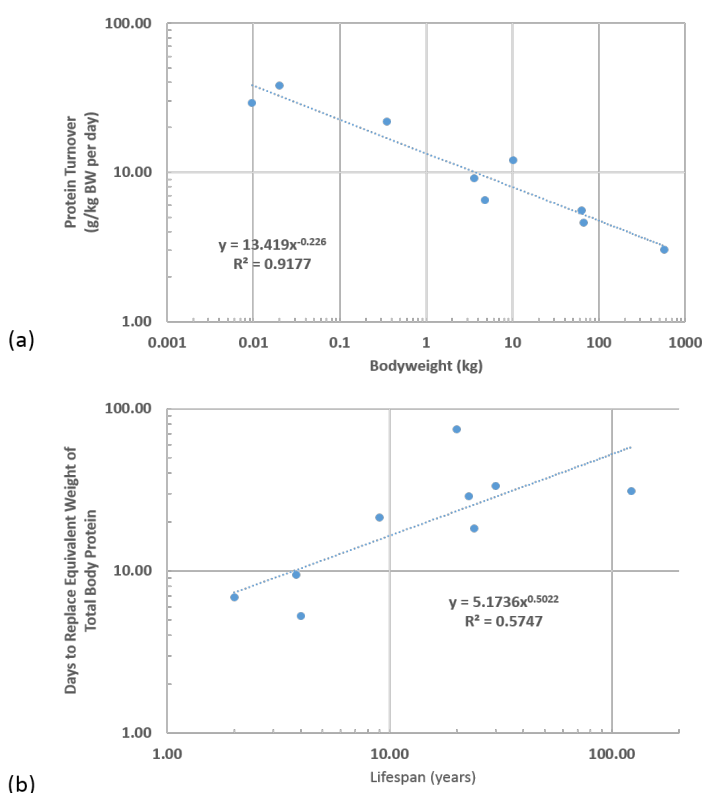

Fig. 4. (a) Protein turnover as a function of bodyweight for the species listed in Table 1 and (b) frequency at which the equivalent weight of total body protein is synthesized as a function of MLSP. Data from Table 1.

## 6.2 Organismal Entropy Increases Slowly with Age in Comparison to Internal Entropy Production Rate

The high frequency at which the animals depicted in Table 1 replace their total body protein mass demonstrates that degradative internal entropy production  $d_i S/dt$  is being counteracted at a rate much greater than the rate at which organismal entropy increases with age  $dS_{age}/dt$ .

$$\frac{dS_{age}}{dt} \ll \frac{d_i S}{dt} \quad (21)$$

Eq. ( 21 ) is also intuitively evident when the speed at which biological material degrades at biologically relevant temperatures, even when conditions are sterile and optimized, is contrasted against the lifespan of an organism with even moderate longevity. Nevertheless, the overall degradation state of an individual organism eventually worsens with time. The degradation of an aging organism could be viewed as a progression through many discrete steady-state nonequilibrium conditions which ultimately result in a level of deterioration that render the individual unviable. But why do organisms transition between these states and why is youthful homeostasis always lost? It was argued earlier that DNA molecules face inevitable losses in mutual DNA information in aging organisms. This offers an explanation for why this transition occurs in DNA molecules—yet if they are the *only* class of biomolecule in an organism directly subject to inevitable, irreversible loss then the reasons for other classes of biomolecules reaching substantial degradation states with age must be more complex.

## 6.3 Biomolecular Degradation - Accumulation versus Homeostatic Shifts

A closer look at the degradation in these other classes of biomolecules could help to elucidate what may be occurring. Aging has been described as the accumulation of unrepaired damage. This implies that all of the degraded biomolecules in an aged organism are the result of lifelong accumulation. Perhaps this assessment is not entirely accurate.

As demonstrated earlier, an organism is unable to sustain a steady-state condition of perfect biomolecular fidelity (a degradation state  $D$  of zero) as this would require infinite resources—thus even in a youthful state of “homeostasis” organisms will have some level of biomolecular degradation (a non-zero degradation state). “Misrepair” is not required in order to have degraded biomolecules as degradative internal entropy production is present in all living organisms.

A reduction in biomolecular replacement or repair rates is predicted to increase degradation state (i.e. decrease average biomolecular performance). Should such a transition occur in an organism for a particular biomolecule, it is expected that a new degradation state would eventually be established, at which time no further reduction in quality should occur unless outside factors are at play.

This logic suggests that biomolecular replacement and repair rates alone do not explain how an accumulation of damaged biomolecules could occur. Restoration of proteasome function in aged human dermal primary fibroblasts largely restores markers of protein aging to youthful levels (Hwang et al., 2007). This is analogous to a shift in the quality of the protein pool from a higher to a lower degradation state and demonstrates that the shift in biomolecular quality occurring with age is at least partially reversible. If the degraded protein is truly representative of accumulated, irreparable damage then upregulation of proteasomal function should not eliminate any damage. The fact that the condition is essentially reversible suggests that the increase in the proportion of damaged biomolecules found in aged organisms is more likely attributable to reduced biomolecular turnover leading to a corresponding shift in biomolecular degradation state—not damage accumulation.<sup>5</sup> Consistent with this notion, protein turnover does indeed significantly decline during aging (Rattan, 1996; Richardson and Cheung, 1982; Ryazanov and Nefsky, 2001).

---

<sup>5</sup> A small number of biomolecules evidently *can* accumulate into dysfunctional products when an organism has declined (aged) to a certain degree; for example, advanced glycation end products (AGEs) and certain other aggregates (Verzija et al., 2000). A decline in global biomolecular repair and replacement processes can lead to biases generating significant differences in repair and replacement rates between biomolecules. With infrequent turnover, the proportion of certain types of damaged product can expand, even when youthful turnover levels prevent accumulation. Superficially, this type of damage could be thought of as ‘accumulated’. An example of this phenomenon was demonstrated by De Baets et al. (2011). I am not aware of any published data

658 A distinction between “accumulated” dysfunctional biomolecules and a shift in biomolecular degradation state caused by  
659 reduced turnover can be made by simply examining whether turnover is occurring. “Damage” that is actively and  
660 continuously turned over should not be referred to as accumulated damage, even if the degradation state of the  
661 biomolecule is high.

662 This raises further doubt over the disposable soma theory’s assertion that aging is caused by an energetic underinvestment  
663 in repair and maintenance resulting in an accumulation of damage (Kirkwood, 1977; Kirkwood and Holliday, 1979;  
664 Kirkwood and Rose, 1991). The idea of an “energetic underinvestment” is a misnomer as there is no amount of energetic  
665 investment that will produce a perfect population of biomolecules (a degradation state of zero). Increasing biomolecular  
666 turnover rates will reduce biomolecular degradation state but energetic resource ROI will continually worsen as turnover  
667 rate is increased. An energetic underinvestment in repair and replacement cannot explain why youthful homeostasis is  
668 lost—there must be a higher-level initiating cause.

669 The fact that biomolecular degradation state is partly determined by resource allocation towards repair and replacement,  
670 and therefore must involve factors that affect fitness, suggests that species have evolved to operate at biomolecular  
671 degradation states, and with internal entropy production rates, that balance many factors including athletic performance,  
672 metabolic rate, physical size, etc. This alone does not provide direct insight into why organisms age. However, the concept  
673 of biomolecular degradation states is useful when considered together with the inevitability of mutual DNA information  
674 loss in helping to explain why youthful homeostasis cannot be indefinitely preserved.

#### 675 6.4 Entropy-Driven Managed Deterioration – Basic Concepts

676 The energetic cost of repairing an aged individual’s degraded biomolecules once is small relative to the continuous  
677 investment made to sustain viable biomolecular degradation states. So why does biomolecular degradation state increase  
678 in an aging individual?

679 Fig. 5 depicts a basic sequence of “events” that may explain the progression of the aging phenotype in many metazoans.  
680 In this model, the key top-level event initiating the transition from youthful homeostasis is internal entropy production,  
681 which inevitably generates losses in mutual DNA information for both mitochondrial and nuclear DNA. Mutual DNA  
682 information losses in mitochondrial DNA (mtDNA) will cause mitochondria from aged individuals to exhibit lower peak  
683 energy output (Yaniv et al., 2013). This decline in mutual mtDNA information may be partially modulated by a controlled  
684 deceleration in mitochondrial biogenesis (Figge et al., 2012), which reduces the rate of clonal expansion of degraded  
685 mtDNA and limits the exposure of mtDNA to the high thermodynamic stress conditions of replication events. The  
686 escalating deficit in cellular energy currency production in the aging individual results in a progressively worsening inability  
687 to fund all cellular processes at youthful levels. This generates forced reductions in biomolecular turnover that lead to  
688 increased biomolecular degradation states and lower biomolecular performance, representative of a transition away from  
689 youthful homeostasis.

690 Losses in nuclear DNA fidelity will result in a mosaic of stochastic cellular dysfunction that worsens with age (Bahar et al.,  
691 2006; Lodato et al., 2015). Together with the described mitochondrial dysfunction, this could be largely responsible for  
692 age-linked cellular dysfunction and the overall aging phenotype of the individual. Longevity optimization genes may have  
693 evolved to attenuate the negative effects of mutual information losses in nuclear and mitochondrial DNA through  
694 reallocation of resources and physiological alterations. This model is discussed in more detail in section 8.

---

suggesting that this accumulation occurs under normal circumstances absent significantly decreased turnover (such as that which occurs with advanced age). Many of the same protein species found to aggregate with age have been shown to be produced, and are concomitantly cleared, in younger individuals.

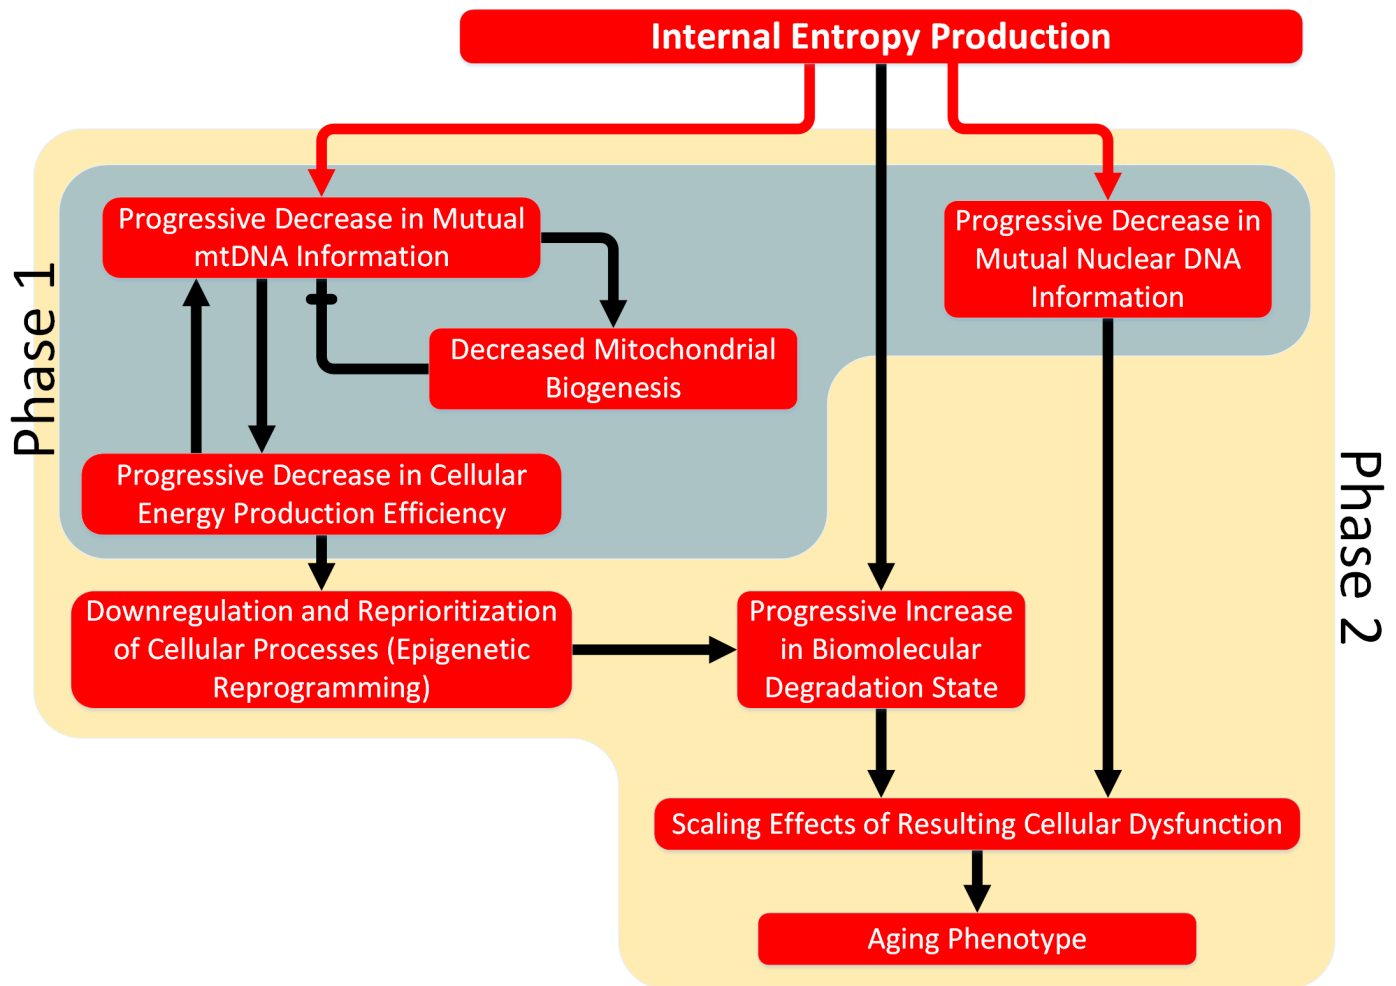

Fig. 5. A sequence of major events during aging that may largely describe the progression of the aging phenotype in many metazoa. During 'Phase 1' of an individual's life, mutual DNA information loss has not reached levels sufficient to generate an aging phenotype. 'Phase 2' begins when dysfunction has progressed to the point that aspects of the aging phenotype begin to take hold.

## 7 Longevity Determination

Leonard Hayflick has stated that aging is not driven by genes but by thermodynamics (Hayflick, 2004), while he has argued that the genome does, on the other hand, govern longevity. Additionally, Hayflick maintains that natural selection has led towards biomolecular arrangements that are capable of preserving fidelity until reproductive maturity, but that the survival value for arrangements that exceed this longevity is considerably diminished (Hayflick, 2007b).

If aging is driven by thermodynamics, as suggested by Hayflick and further supported here, then any and all factors that contribute towards resisting (or promoting) permanent thermodynamically-induced changes in any biocomponent subject to irreversible loss are implicated in longevity determination. This includes factors that directly or indirectly affect the magnitude of the thermodynamic stresses on these biostructures as well as factors that specify redundancy levels, which can offer varying degrees of protection from permanent information loss.

The loss of mutual DNA information is inevitable in an individual given sufficient time. If such loss is paramount to aging, then a closer examination of the thermodynamics affecting DNA molecules is warranted and may assist in identifying primary longevity determinants.



708

## 7.1 Investigating the Rate of Mutual DNA Information Loss in Individuals

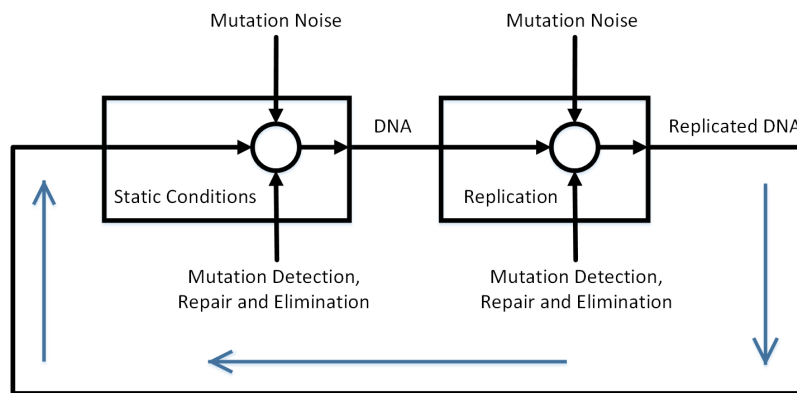

Fig. 6. A systems flow diagram of mutual information loss in a DNA ensemble within a living organism.

709

710

711

712

713

714

715

716

To further examine the rate of mutual DNA information loss, it is useful to separate the various contributing conditions and factors. DNA undergoing replication is significantly more likely to undergo mutation due to the impaired stability of single-stranded DNA (Frederico et al., 1990) and the imperfect nature of DNA polymerases (Arias-Gonzalez, 2012). Therefore, replicating and non-replicating conditions should be considered independently. In a living cell, many DNA insults are eliminated by damage-detection and repair systems, but a certain percentage will not be eliminated. A systems flow diagram of this scenario is depicted in Fig. 6. DNA actively being transcribed is also more susceptible to mutation (Kim and Jinks-Robertson, 2012), but it is generally believed that the vast majority of mutations arise from replication events or random DNA damage. For this reason, transcription will not be considered as a separate state condition in this analysis.

717

718

Assuming that the time spent in the replicative state is comparatively much less than the time in the static state, a general representation of the average rate of mutual DNA information loss takes the form

$$\overline{MIR}_{DNA} = -(k_{rep}r_{rep}p_{noise} + k_{static}r_{mut})(1 - p_{det}) \quad (22)$$

719

720

721

722

723

where  $k_{rep}$  is the amount of mutual information lost in the average mutation-causing event during replication and  $k_{static}$  is the same for static (non-replicating) conditions,  $r_{rep}$  is the DNA replication rate,  $p_{noise}$  is the probability that a replication event will result in a mutation,  $p_{det}$  is the probability that a mutation will be detected and eliminated by the cell (assumes similar probability for replicating and non-replicating conditions), and  $r_{mut}$  is the rate at which mutations are occurring in non-replicating conditions.

724

## 7.2 Preserving mtDNA Integrity

725

726

727

728

729

730

731

732

733

734

735

736

737

738

The cells of most eukaryotes contain mitochondria, which range in number from several hundred to thousands per cell. Each mitochondrion contains at least one copy of mtDNA. As the primary function of mitochondria is to generate ATP, mitochondrial dysfunction has the potential to produce deleterious downstream effects on every cellular biochemical reaction that requires ATP. Compared to the nuclear genome, the mitochondrial genome is more susceptible to mutation (Larsson, 2010) and these mutations are more likely to cause dysfunction. There are several reasons for this. For one, the mitochondrial genome is replicated during mitobiogenesis, which is required for preservation of a healthy pool of mitochondria (low degradation state). Generally speaking, in any given cell a pool of mitochondria will be maintained at relatively steady quantities by a combination of mitochondrial fusion, fission, mitophagy, and mitobiogenesis processes; this results in mtDNA replication rates that are very high compared to the rate at which nuclear DNA replicates (which, of course, only occurs when cells divide). Due to the imperfect fidelity of replication with DNA polymerase (Zheng et al., 2006) and the vulnerability of the single-stranded mtDNA replicon (Frederico et al., 1990), each replication event involves a period of time where the possibility for a mutation is considerably higher than non-replicating conditions (Kennedy et al., 2013). The microenvironment within a mitochondrion is also particularly harsh compared to other cellular compartments due to the relatively high concentrations of ROS (Wallace, 1999), resulting in larger internal entropy-

739 producing thermodynamic potentials and higher molecular insult rates. Furthermore, as the mitochondrial genome has  
740 evolved to be extremely compact, mitochondria are very susceptible to dysfunction resulting from single-base alterations.

741 Eq. ( 22 ) can be applied to mtDNA in order to identify factors that could influence the rate at which mutual mtDNA  
742 information is lost. Each mtDNA replication event carries an associated probability of resulting in mtDNA mutation  
743 ( $p_{noise,mtDNA}$ ). Mutations can also occur when mtDNA are not replicating. Many of these mutated mtDNA molecules will  
744 be eliminated or repaired by the cell's mitochondrial quality-control mechanisms, but a certain percentage of these  
745 mutations will escape detection (represented by  $1 - p_{det,mtDNA}$ ).

746 The only known human mtDNA polymerase, DNA polymerase  $\gamma$ , is highly conserved across species as diverse as *Drosophila*  
747 *melanogaster* and *Saccharomyces cerevisiae* (Chan and Copeland, 2009). Nuclear DNA repair pathways are highly  
748 conserved (Gredilla et al., 2010); although mtDNA repair pathways have not been investigated as thoroughly,  
749 mitochondria have been found to possess many of the same repair mechanisms and even share some of the nuclear DNA  
750 repair enzymes. The GTPases implicated in mitochondrial fission and fusion are also highly conserved (Ashrafi and Schwarz,  
751 2012). PTEN-induced putative kinase protein 1 (PINK1) and the E3 ubiquitin ligase parkin regulate mitophagy in many  
752 metazoans and have homologs across species as diverse as humans and *Drosophila melanogaster* (Cookson, 2012). These  
753 similarities suggest that the probability of a mtDNA replication event resulting in a mutation  $p_{noise,mtDNA}$  and the  
754 probability that a mutated mtDNA molecule will be detected and eliminated or repaired  $p_{det,mtDNA}$  are comparable across  
755 a wide range of species.

756 In addition, since the molecular configuration of DNA is conserved, as are the potential reactions that can result in  
757 molecular modifications, it follows that the mutual information lost in the average mutation-causing event is constant; i.e.  
758  $k_{rep}$  and  $k_{static}$  should be similar across species. This leaves the mtDNA replication rate  $r_{rep,mtDNA}$  and the static-  
759 condition mutation rate  $r_{mut,mtDNA}$  as the likely primary factors from Eq. ( 22 ) responsible for any variation in the rate of  
760 mutual mtDNA information loss between species.

### 761 7.3 MtDNA Information Loss in Aged Organisms is Primarily the Result of Mutations During Replication

762 MtDNA mutations increase in an age-dependent manner. High-sensitivity sequencing of human brain tissue from young  
763 and old individuals found that most mtDNA point mutations are transition mutations (Kennedy et al., 2011), consistent  
764 with replication errors. In addition, 90% of all age-related mutations in mtDNA from human colon are transitions (Greaves  
765 et al., 2012). The mtDNA mutation burden in aged *Drosophila melanogaster* is similar to vertebrate levels and also  
766 demonstrates a prevalence of transition mutations (Itsara et al., 2014). G:C to T:A transversions, which are typical of  
767 oxidative damage, only represented a small percentage of the mutations in these studies.

768 MtDNA mutation patterns display strand asymmetry consistent with spontaneous cytosine deamination on the lagging  
769 strand template during replication (Frederico et al., 1990) in both aged human brain (Kennedy et al., 2011) and aged  
770 somatic and germline cells of *Drosophila melanogaster* (Haag-Liautard et al., 2008; Itsara et al., 2014). Mitochondrial  
771 mutational spectra produced with purified human DNA polymerase  $\gamma$  accounted for 83% of the mutations found *in vivo*  
772 (Zheng et al., 2006). These data strongly suggest that: 1) the majority of mutations in mtDNA result from errors during  
773 replication, 2) the rate of mutual mtDNA information loss varies across species but reaches similar levels in aged organisms  
774 despite lifespan differences, 3) oxidatively-damaged mtDNA is repaired or eliminated with very high efficiency, and 4)  
775 oxidatively-damaged mtDNA accounts for only a small percentage of mtDNA mutations occurring with age. Furthermore,  
776 these results are inconsistent with theories that implicate ROS levels and the resulting direct oxidative damage to DNA as  
777 a primary causative factor of aging.

778 A logical deduction from this is that mtDNA replication rate is higher in shorter-living animals. Unfortunately, the  
779 availability of data to support or refute this assertion is limited. Measuring the mtDNA turnover rate *in vivo* has historically  
780 proven difficult, although more recent techniques have overcome some of the issues (Collins et al., 2003). Primary cell  
781 cultures are required for deriving accurate mtDNA replication rates *in vitro*. Surprisingly, no studies that quantitate mtDNA  
782 replication rates across a range of species have been published.

783 Mitobiogenesis is required to maintain mitochondrial component quality. Reducing the rate of mitobiogenesis excessively  
784 will compromise mitochondrial performance since less negative entropy will be produced to counteract degradative  
785 internal entropy production and, as a result, a shift to a higher degradation state will occur. Yet mitobiogenesis  
786 incorporates mtDNA replication, so a reduction in mitobiogenesis will also generate reductions in the replication rate of  
787 mtDNA  $r_{rep,mtDNA}$ . Thus, although reduced mitobiogenesis could negatively impact mitochondrial performance, provided  
788 that the rate of mutation during non-replicating conditions  $r_{mut,mtDNA}$  does not drastically increase, reduced  
789 mitobiogenesis will lead to a lower rate of mutual mtDNA information loss per Eq. ( 22 ).

790 On the other hand, a higher mitobiogenesis rate will increase the amount of negative entropy available to offset  
791 degradative internal entropy production affecting mitochondrial components (other than mtDNA), effectively lowering  
792 the degradation state in those components. However, this will also raise the mtDNA replication rate  $k_{rep,mtDNA}$  and  
793 generate increased exposure of mtDNA to the high thermodynamic-stress conditions experienced during replication—  
794 resulting in an increase in the rate of mutual mtDNA information loss.

795 Preservation of youthful mitochondrial homeostasis requires that the rate of negative entropy production from  
796 mitobiogenesis equals or exceeds the rate of degradative internal entropy produced within the mitochondrial network  
797 when in a youthful degradation state. If the rate of degradative internal entropy production within mitochondria varies  
798 between species, then the rate of mitobiogenesis required to preserve youthful homeostasis in mitochondrial components  
799 is likely to also vary. In addition, differences in the intrinsic mitochondrial degradation state between species could affect  
800 the rate of mitobiogenesis. This suggests that variations in the rate of mutual mtDNA information loss between species  
801 are likely due to either differences in the rate of mitochondrial degradative internal entropy production or different  
802 degradation states.

#### 803 7.4 A Closer Look at Mitochondrial Configurations and Membrane Composition

804 In order to preserve youthful cellular homeostasis, mitobiogenesis must occur at a rate sufficient to sustain mitochondrial  
805 component quality at youthful levels by producing negative entropy to offset degradative internal entropy production.  
806 Yet since mitobiogenesis encompasses mtDNA replication, which accelerates losses in mutual mtDNA information,  
807 forfeiture of youthful mitochondrial homeostasis is not only inevitable but must occur after a period of time dictated, at  
808 least in part, by the rate of mitobiogenesis. How then might this rate differ by species, and why?

809 An examination of cellular metabolic demands provides some clues. Across species, whole-organism basal metabolic rate  
810 scales allometrically with body mass:  $BMR \propto M_b^f$ . Kleiber (1932) estimated  $f$  to be 3/4 for the basal metabolisms of  
811 mammals and birds. This same value was found to hold for most multicellular organisms, including many other animals  
812 (Peters, 1986) and plants (Niklas, 1994).<sup>6</sup> When expressed per unit body mass, resting oxygen consumption scales  
813 proportionally with  $M_b^{-1/4}$ . In other words, mass-specific BMR decreases by approximately 16% for every doubling of body  
814 mass. The inverse correlation between relative oxygen consumption and body mass has been verified in isolated  
815 hepatocytes from mammals (Porter and Brand, 1995) and birds (Else, 2004) as well as in mammalian liver slices (Couture  
816 and Hulbert, 1995). Porter and Brand (1995) found a 5.5-fold decrease in hepatocyte oxygen consumption for every  
817 12,500-fold increase in body mass and concluded that this was due to a decrease in the intrinsic metabolic activity of the  
818 cell, not increased cell volume.

819 Therefore, on average, cells from smaller species have increased oxygen consumption and ATP turnover rates compared  
820 to cells from larger organisms. As a result, cells from smaller species place greater energetic demands on their  
821 mitochondrial networks. It has been known for some time that mitochondrial count correlates with mass-specific changes  
822 in tissue metabolic rate (Smith, 1956). However, the differences in mitochondrial number per cell cannot fully explain the  
823 variation in respiration rate with body mass (Porter and Brand, 1995).

---

<sup>6</sup> The universal value of  $f$  is contentious. Scientists are largely divided into two camps: one arguing for 2/3 and the other for 3/4 (White and Seymour, 2005).

824 Increasing the mitochondrial inner membrane surface area per unit volume of mitochondrial matrix allows for additional  
825 transmembrane-localized oxidative phosphorylation enzymatic machinery in the same volume of space. Organisms with  
826 higher ATP demands may benefit from increased membrane density. Indeed, a significant negative correlation has been  
827 found between mitochondrial inner membrane surface area per unit volume of matrix and body mass. In a study involving  
828 mammalian hepatocytes, membranes were as dense as 555 cm<sup>2</sup> per μL of matrix in mice while on the other end of the  
829 spectrum horse hepatocytes contained only 170 cm<sup>2</sup> membrane surface area per μL of matrix (Porter et al., 1996).

830 Mitochondrial membrane phospholipid composition also differs widely across species, specifically in fatty acid  
831 composition (Daum, 1985). The fatty acid composition of mitochondrial membranes in tissues was found to correlate with  
832 body size, with smaller mammals having more polyunsaturated mitochondrial membranes than larger mammals (Porter  
833 et al., 1996). The “membrane pacemaker hypothesis of metabolism” (Hulbert and Else, 1999), and subsequently the  
834 “membrane pacemaker theory of aging” (Hulbert, 2003), were developed from these and other observations linking not  
835 only mitochondrial but overall tissue membrane composition to metabolic rate, body mass, and longevity. Hulbert (2003)  
836 suggested that changes in membrane fatty acid composition can make membranes more prone to oxidation, resulting in  
837 an increase in reactive molecules that can damage cellular molecules and impact longevity.

838 Why does membrane fatty acid composition vary allometrically? Some light was shed on this question when the molecular  
839 activity of transmembrane proteins were examined in different membrane compositions. The cytoplasmic membrane-  
840 localized sodium pump (Na<sup>+</sup>-K<sup>+</sup>-ATPase) varies in molecular activity from approximately 8,000 ATP/min in mammals  
841 compared to 2,500 ATP/min in ectotherms (all data taken at 37°C) (Else et al., 1996). Cytoplasmic membrane crossover  
842 studies demonstrated that the activity of ectothermic sodium pumps increased significantly when transferred to  
843 mammalian membranes, while mammalian sodium pump activity was attenuated in ectothermic membranes (Else and  
844 Wu, 1999).

845 It was hypothesized that the higher sodium pump activities seen in endotherms were due to influences from surrounding  
846 lipids, with polyunsaturated membranes promoting increased molecular activity compared to membranes with more  
847 monounsaturated membranes. Hulbert and Else (1999) proposed a mechanism by which this may occur: The lateral  
848 diffusion coefficient of lipids within a membrane bilayer is greater than that of transmembrane proteins by two orders of  
849 magnitude (Storch and Kleinfeld, 1985). As such, membrane proteins are continuously colliding with membrane lipids. The  
850 kinetic energy exchanged during these collisions is believed to be critical in facilitating membrane protein function. The  
851 acyl chains of saturated and monounsaturated fatty acids are more flexible than polyunsaturated fatty acids. Therefore, a  
852 collision involving a lipid containing polyunsaturated fatty acids is expected to transfer more energy to membrane proteins  
853 and result in increased molecular activity of the protein than a collision with a lipid containing only highly saturated fats.  
854 Of the fatty acids found in membrane lipids, docosahexanoic acid (DHA or 22:6 n-3) contains the largest number of evenly  
855 spaced double bonds but is also particularly susceptible to peroxidation. DHA has been referred to as the “acme” of  
856 polyunsaturates and may serve as a membrane “energizer” (Hulbert and Else, 1999). Sodium pump molecular activity  
857 correlates with membrane DHA concentration in both ectotherms (Turner et al., 2005) and endotherms (Turner et al.,  
858 2003).

859 Peroxidation index is a measure of the susceptibility of membrane lipids to peroxidation and is closely tied to fatty acid  
860 unsaturation. The peroxidation index of mitochondrial phospholipids, predominantly driven by DHA content, negatively  
861 correlates with MLSP (Pamplona et al., 1998). Importantly, the same trend line holds for both mammals and birds (Hulbert  
862 et al., 2007). In addition, mitochondrial membrane remodeling resulting from various levels of caloric restriction in mice  
863 produced changes in peroxidation index and MLSP that fit the same trend line (Faulks et al., 2006; Hulbert, 2008).

864 In addition to the negative allometry of metabolic rate, body mass positively correlates with MLSP (Austad, 2005; Calder,  
865 1984; de Magalhães et al., 2007). The discussed findings suggest that smaller, shorter-living organisms may utilize  
866 membranes with more polyunsaturated membranes—largely dictated by DHA content—in order to increase the rate of  
867 work that can be performed by each transmembrane protein molecule and, as discussed in section 7.6, to satisfy functional  
868 requirements largely specified by recognized allometric relationships that characterize fitness optimization across species.

869 A downside of polyunsaturated fatty acids is their susceptibility to oxidative damage and contribution towards increased  
870 free radical generation. In other words, polyunsaturated fatty acids are less resistant to molecular alterations resulting  
871 from the thermodynamic forces of their environment; the presence of higher levels of polyunsaturated fatty acids will  
872 lead to increased rates of degradative internal entropy production and will necessitate that mitobiogenesis rates be  
873 increased to maintain a given mitochondrial degradation state.

#### 874 7.5 Identifying Longevity Determinants

875 In his “membrane pacemaker theory of aging”, Hulbert (2005) proposed that membrane lipid peroxidation influences the  
876 cellular levels of ROS, resulting oxidative stress and consequently lifespan. He posited that this feedback effect is variable  
877 and determined by the membrane fatty acid composition. Hulbert further suggested that this results in accumulated  
878 damage to proteins, genetic material and membrane lipids over an individual’s life—finally reaching a tipping point where  
879 antioxidant defenses are exceeded and youthful homeostasis can no longer be sustained.

880 The argument for membrane composition as a longevity determinant is a strong one, even though the exact mechanisms  
881 by which a longevity determining effect is exerted have yet to be fully elucidated. However, Hulbert’s theory is not in  
882 agreement with the negative relationship found between levels of antioxidant defenses and MLSP. Long-living species  
883 have very low levels of antioxidants (Perez-Campo et al., 1998) and most mtDNA mutations do not appear to be directly  
884 due to oxidative stress (Greaves et al., 2012; Haag-Liautard et al., 2008; Itsara et al., 2014; Kennedy et al., 2011; Zheng et  
885 al., 2006). If organisms with more peroxidation-susceptible membranes utilize upregulated antioxidant levels as a  
886 countering effect then why is their lifespan still so much shorter? Furthermore, why must youthful homeostasis be lost at  
887 all?

888 I offer an explanation for how a longevity-determining effect could arise from the influence of membrane composition on  
889 biomolecular turnover rate, metabolism, and ultimately the rate of loss of mutual DNA information. My concept is  
890 depicted in Fig. 7. I postulate that membrane composition, and certain other defining characteristics of an organism, are  
891 largely stipulated by an organism’s peak power density, which has evolved to the level that maximizes fitness in each  
892 species. Here the term “peak power density” represents the maximum localized volume specific rate of external work that  
893 is achievable within an organism. The cells or tissues where this potentiality exists may vary by species (for example,  
894 skeletal muscle in some organisms, neurons in others, etc.). “External work”, in the context of peak power density, refers  
895 to the sum of biomechanical, biochemical and bioelectrical work that is brought to bear on the immediate environment  
896 surrounding the localized region where this work originates. Examples include the mechanical work generated by  
897 myocytes, the chemical and electrical work produced by neurons, or the chemical work performed on metabolized  
898 products by hepatocytes. External work does not include the work that is associated with housekeeping or “overhead”  
899 cellular processes such as biomolecular repair and replacement, maintenance of membrane potentials or mitotic cell  
900 turnover.

901 To illustrate the sequence of interactions implicated in this theory, we will consider an arbitrary organism where fitness is  
902 maximized by a high level of peak power density compared to some reference organism (Fig. 7). A higher level of peak  
903 power density implies an increase in the rate of external work that can be performed by a cell, or a group of cells, of a  
904 given volume. I postulate that high-output proteins are utilized for realizing this external work in both transmembrane  
905 and non-transmembrane locations. To maximize the rate of work attainable from a given volume, the molecule-specific  
906 rate of work of the proteins must be as high as possible. One requirement for achieving this is to optimize the structure  
907 of the protein for peak work rate, **1** (bold numbers in this section refer to Fig. 7). This is likely to reduce biomolecular  
908 durability and resiliency (due to lower selective pressure on these parameters), and protein repair/replacement rate  
909 (turnover) may increase as a result. Secondly, the biomolecular performance of the protein pool should be maintained at  
910 a high level (i.e. degradation state should be low), **2**. In this way, the contribution from the average protein molecule will  
911 be closer to the theoretical maximum. Maintaining low degradation states will increase the rate of protein turnover and  
912 lead to a less-than-optimal energetic ROI.

913 High peak power density signifies the ability to perform work at an increased rate. It does not mean that the maximum  
 914 limit is achieved at all times. On the other hand, if the limit was never approached then there would be no need to possess  
 915 this ability in the first place. For these reasons, it is reasonable to expect that high-output proteins are likely to perform  
 916 work at a higher rate, on average, than low peak power density configurations, **3**. At a minimum, the cell must have the  
 917 ability to provide sufficient energetic resources for these high-output proteins even if peaks levels are only utilized

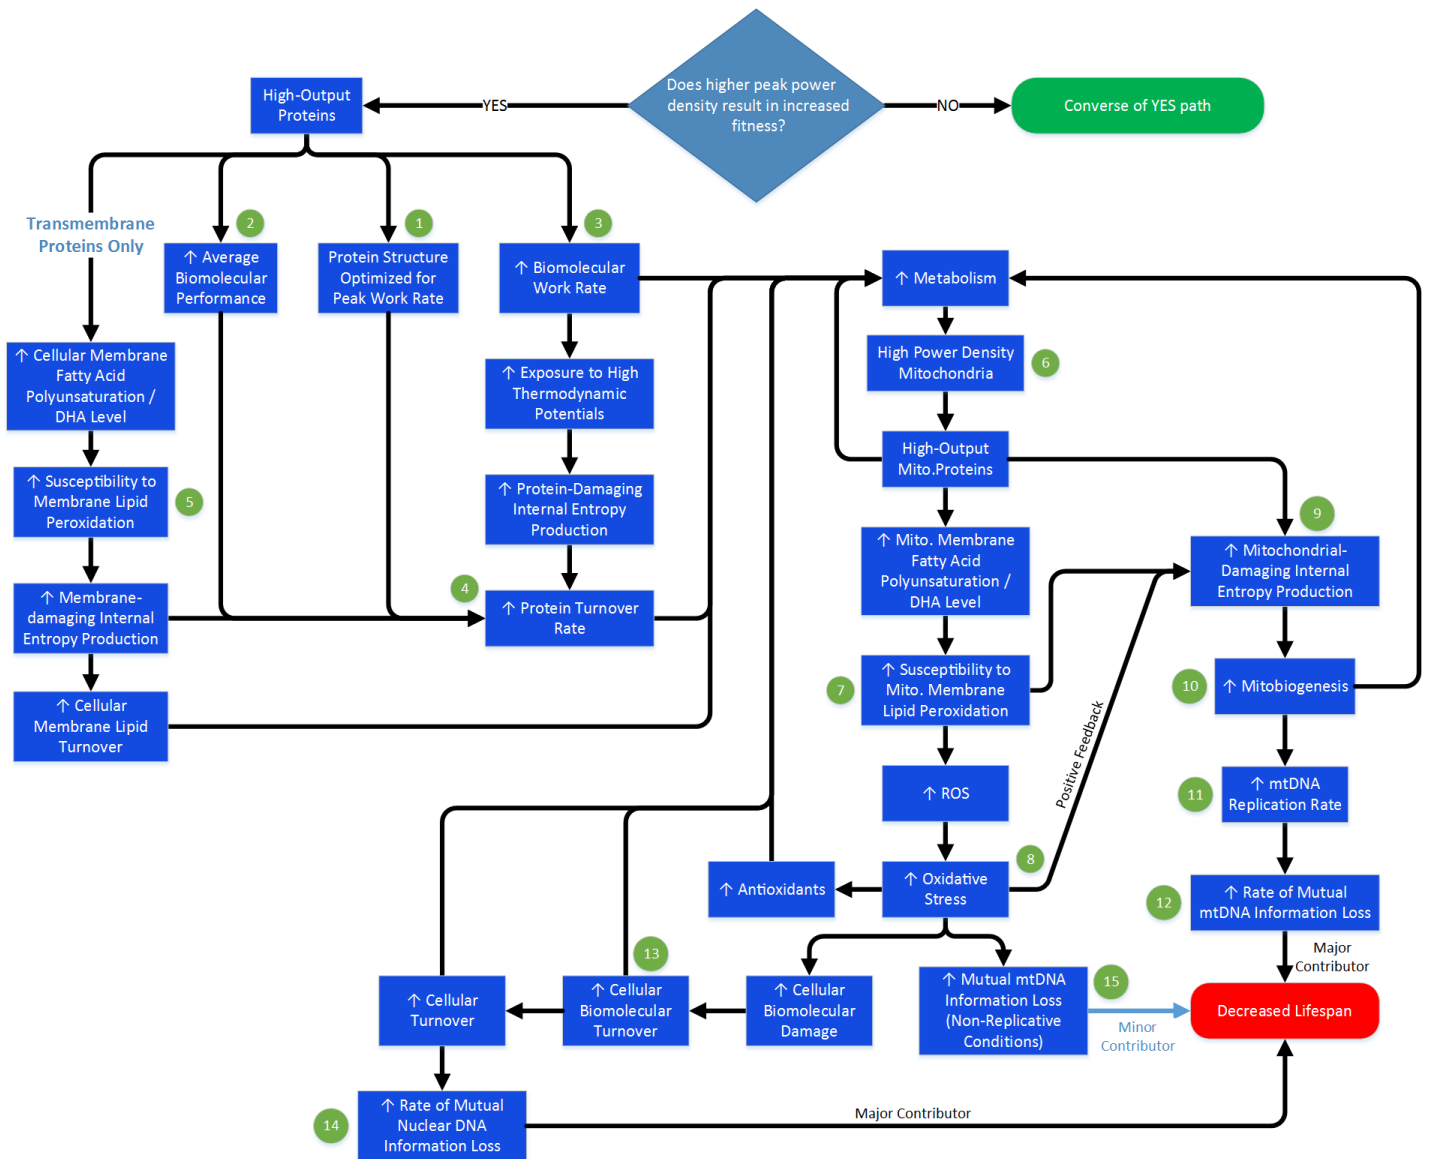

Fig. 7. A theoretical means by which an organism's peak power density may influence longevity. Bold numbers in section 7.5 text refer to this figure.

918 sporadically. This will equate to a requirement for more usable energy per unit time (i.e. higher ATP turnover) and  
 919 therefore increased metabolic requirements.

920 In addition, to achieve a maximal rate of work, high-output proteins must spend more time performing work and less time  
 921 in a resting state. The state of actively performing work involves the transfer of energy and conditions of higher  
 922 thermodynamic potentials than the static, non-working (resting) state. For these reasons, degradative internal entropy  
 923 production is likely to be elevated with high-output proteins, resulting in increased protein turnover and further  
 924 contributing towards a greater metabolic rate, **4**. This is consistent with the increased metabolic rates found in smaller

925 animals and the fact that smaller animals turnover protein at faster rates compared to larger species (as illustrated in Fig.  
926 4).

927 Transmembrane proteins have increased activity in membranes with lipids that utilize more polyunsaturated fatty acids  
928 (increased DHA content) (Else and Wu, 1999; Turner et al., 2003; 2005). It is predictable that configurations that call for a  
929 high level of peak power density include these type of membranes, which are also more susceptible to lipid peroxidation,  
930 **5**. This contributes towards an elevated rate of membrane-damaging internal entropy production that generates more  
931 frequent membrane lipid turnover and further increases in transmembrane protein turnover rate.

932 The aforementioned metabolic increases dictate mitochondrial networks that are capable of satisfying these high ATP  
933 turnover demands. This is realized with high power density mitochondria, **6**, the characteristics of which are outlined in  
934 Fig. 8. High-output mitochondrial proteins optimized for maximal ATP production are expected with these configurations.  
935 Similar to their cytoplasmic counterparts, high-output mitochondrial proteins will also increase metabolic requirements  
936 and are more susceptible to degradation. Increased mitochondrial membrane fatty acid polyunsaturation / DHA levels  
937 allow for increased peak ATP output through enhanced transmembrane protein activity but cause the mitochondrial  
938 membranes to be more susceptible to lipid peroxidation, **7**. Together with a positive feedback effect from elevated ROS  
939 and oxidative stress levels, **8**, this will increase component-damaging internal entropy production within mitochondria, **9**.  
940 The combination of elevated mitochondrial membrane polyunsaturation / DHA levels and proteins more susceptible to  
941 degradation stipulate that a higher rate of offsetting negative entropy production will be required in order to maintain  
942 mitochondrial quality and preserve youthful organismal homeostasis. This need can only be realized through an  
943 upregulation of mitobiogenesis, which increases the mitochondrial membrane remodeling and protein turnover rate, **10**,  
944 but will coincide with a higher mtDNA replication rate  $r_{rep,mtDNA}$ , **11**. The rate of mutual mtDNA information loss will  
945 increase as a result, **12**. As mtDNA integrity declines, an organism's ability to produce usable energy will become  
946 compromised and worsen progressively. This will generate a downregulation of cellular processes which could largely be  
947 responsible for the aging phenotype.

948 Increased oxidative stress from high power-density mitochondrial configurations is also likely to elevate thermodynamic  
949 potentials in cellular proteins, nuclear DNA and other biomolecules—further contributing towards increased metabolic  
950 requirements due to the need for additional resources for their repair and replacement, **13**. This and the other  
951 aforementioned contributors to increased biomolecular damage and turnover rates are likely to increase the rate of  
952 cellular turnover. The rate of mutual nuclear DNA information loss will be heightened due to elevated replication rates  
953 and this will also increase the rate at which viable stem cells are depleted, **14**. Increased oxidative stress may also influence  
954 the rate of non-replicative mtDNA damage  $r_{mut,mtDNA}$ , **15**. However, due to reasons already discussed, this contribution  
955 is probably small compared to the effects of an increased replication rate.

956 The loss of mutual DNA information in the individual is unavoidable. Notably, the logic established here describes how the  
957 rate of loss of mutual DNA information may be a function of an organism's peak power density requirements, at least in  
958 part. As this rate may be critical in determining the amount of time that passes before youthful homeostasis can no longer  
959 be sustained, a potential link is herein established between an organism's peak power density and lifespan; by this token,  
960 peak power density could be thought of as a high-level longevity determinant.

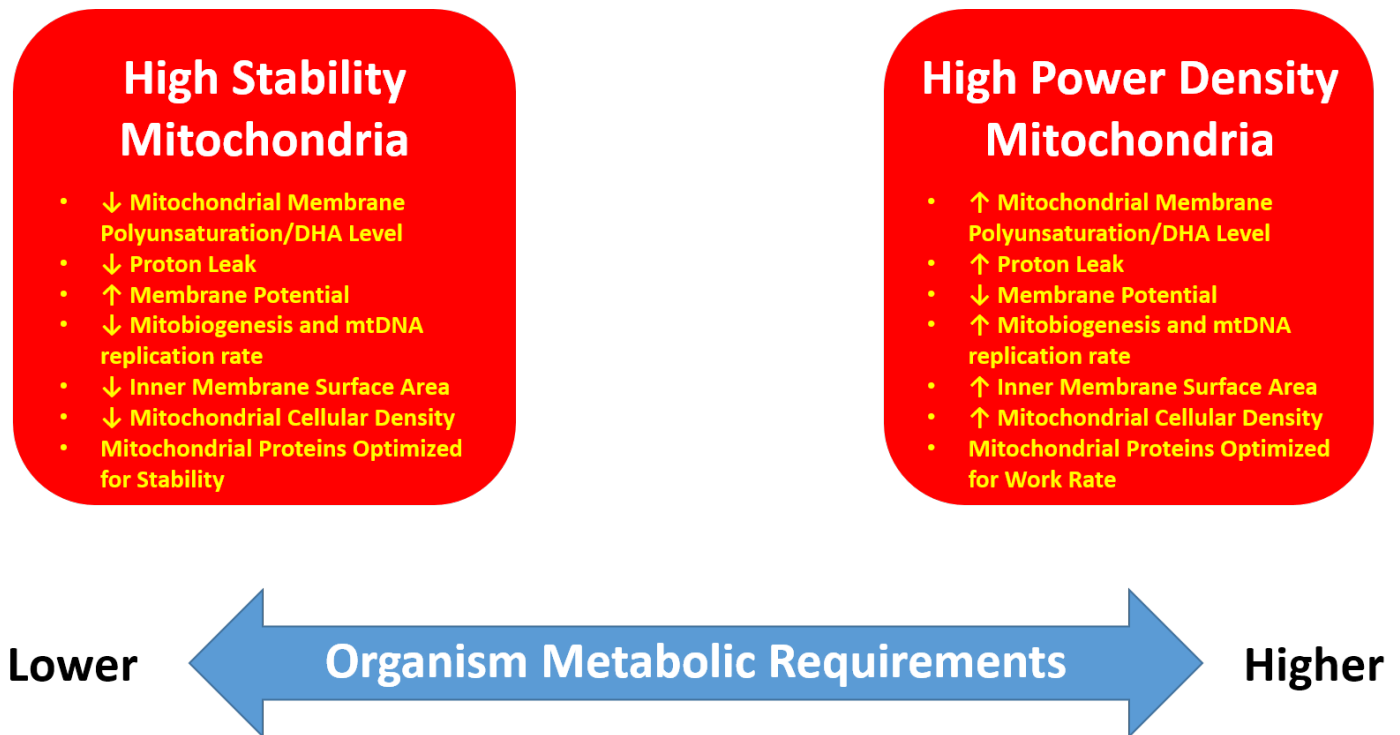

Fig. 8. The characteristics of high stability mitochondria compared to mitochondria optimized for peak power density. The requirements of the organism dictate where a particular species falls within the range of configurations between these two extremes.

961 A solution for the second half of the naked mole-rat paradox discussed in section 2.2 can now be proposed. Naked mole-  
962 rats have limited access to oxygen and as a result they have extremely low metabolic rates. The need to maintain a low  
963 metabolism necessitates low-output proteins, as high-output proteins have increased metabolic requirements for a  
964 number of reasons (Fig. 7). The situation is therefore the reverse of the high peak power density scenario just discussed.  
965 Lower metabolism will lead to mitochondria that are better optimized for stability (Fig. 8). Consistent with this notion,  
966 naked mole-rats have 1/9<sup>th</sup> the content of DHA in their mitochondrial membranes compared to their similarly-sized cousin  
967 the house mouse (Mitchell et al., 2007). Decreased susceptibility to lipid peroxidation will lower the rate of damaging  
968 internal entropy production, mitobiogenesis, and reduce the rate at which mutual mtDNA information is lost. Cellular  
969 turnover and the rate of mutual nuclear DNA information loss will also decrease. The slower rate of mutual DNA  
970 information loss increases the amount of time that passes before transitions from degradation states characteristic of  
971 youthful homeostasis will occur. As a result, the naked mole-rat exhibits exceptional longevity for its size. The increased  
972 oxidative damage present on biomolecules does not limit lifespan as it is not the factor forcing a shift from youthful  
973 homeostasis but is merely indicative of the high degradation state levels that coincide with prioritizing energetic ROI to  
974 maximize fitness in very hypoxic conditions. I postulate that the exceptional longevity of the naked mole-rat is primarily a  
975 byproduct of the aforementioned requirement for extremely low metabolic rate as opposed to direct selective pressure  
976 for extreme longevity.

#### 977 7.6 Allometric Relationships Describe Peak Power Density Trends that Largely Predict Species Lifespan

978 If peak power density is a primary longevity determinant, then how and why does this vary by species? Does it align with  
979 allometric and other trends? Some answers to these questions may arise from examining how an organism's mass-specific  
980 cost of transport (COT) is driven by certain factors. COT is a measure of the quantity of metabolic energy required to move  
981 one unit mass of an organism over one unit distance. In terrestrial animals, COT negatively correlates with body size (Reilly  
982 et al., 2007; Strang and Steudel, 1990; Taylor et al., 1982). The reasons for the increased locomotor costs in smaller  
983 terrestrial organisms have been discussed in detail elsewhere, including Reilly et al. (2007), and Kilbourne and Hoffman  
984 (2013). We will briefly examine some of the more significant causes here. Although the mass-specific metabolic energy



985 consumed per stride remains constant across large and small mammals at the same stride frequency, larger animals  
986 require fewer strides to cover an equivalent distance; this at least partly explains the reduction in COT with increasing  
987 body size (Heglund and Taylor, 1988; Heglund et al., 1982; Kram and Taylor, 1990). The effect is compounded by the fact  
988 that larger mammals have disproportionately longer limbs (positive allometry) (Pontzer, 2007).

989 In general, smaller animals cannot simply decrease their top speeds to offset the increased COT and preserve a low  
990 metabolic rate as they must be able to achieve speeds that are sufficient to evade larger predators. This is demonstrated  
991 by the fact that, although top speed does increase with body mass in mammals (Garland, 1982), the allometric scaling  
992 factor can only partially counteract the increased COT in smaller mammals. In other words, the rate of mass-specific  
993 metabolic energy consumed by smaller mammals to achieve their top speed is greater than that of larger mammals.

994 Posture can also significantly affect COT (Biewener, 1989). Smaller terrestrial animals tend to have limbs that are more  
995 abducted and flexed during movement (Reilly et al., 2007). Larger animals utilize a more upright posture, which confers a  
996 mechanical advantage to anti-gravity muscles. For these reasons, smaller mammals have increased muscular energetic  
997 demands for counteracting the flexing moment of the ground reaction force. Additionally, larger animals are able to  
998 benefit more from elastic storage because the capacity to store energy in tendons positively correlates with tendon cross-  
999 sectional area (Bennett et al., 1986; Biewener and Blickhan, 1988; Biewener et al., 1981). Pendular savings can reduce the  
000 metabolic cost of locomotion and become increasingly relevant as body size increases in erect animals—but are  
001 insignificant in smaller crouched animals (Reilly et al., 2007).

002 For the aforementioned reasons, an increase in the peak power density of skeletal muscles and supporting organs (heart,  
003 lungs, etc.), together with a corresponding increase in the metabolic consumption of the same, is expected in smaller  
004 terrestrial animals. As skeletal muscle is the major contributor to non-resting metabolism, it should not be surprising that  
005 field metabolic rate scales with negative allometry (Nagy, 2005).

006 Surface area scales as a function of body mass per the relation  $A \propto M_b^{2/3}$ . The exponent in this case is less than 1, signifying  
007 that the mass-specific capacity for heat exchange decreases as body size increases. Since no thermodynamic process is  
008 100% efficient, a portion of the energy utilized for metabolism is unavoidably converted to heat. The efficiency of the  
009 oxidative phosphorylation machinery in mitochondria is highly optimized and not a function of body mass, as indicated by  
010 the fact that ATP turnover per unit of consumed oxygen does not change with body mass in mammals (Porter and Brand,  
011 1995). Therefore, in the absence of other limiters, the maximum sustainable metabolic rate will be lower in larger  
012 organisms due to their reduced relative capacity to shed metabolic waste heat. This translates to higher theoretical peak  
013 power densities in smaller organisms. A converse effect of the surface area to mass ratio is believed to limit the minimum  
014 attainable body size of endothermic amniotes: maintenance of a constant body temperature, below a particular body size  
015 for a given set of environmental living conditions, will require an increasing proportion of metabolic energy as body size  
016 decreases.

017 Another factor may also contribute to the minimum attainable body size and generate increased metabolic requirements  
018 in smaller animals. West and colleagues argued that metabolic rate scaling is constrained by characteristics of the  
019 circulatory system (and other fractal networks) that can be explained by principles from fluid dynamics (West et al., 1997;  
020 West and Brown, 2005). As vessels become smaller, viscosity causes energy to be dissipated at a substantially increased  
021 rate. Additionally, flows become highly damped in smaller vessels and unable to benefit from impedance matching, which  
022 can greatly reduce the energy lost due to reflections in larger vessel branch points. These energy consuming effects play  
023 an ever-increasing role as body size decreases and narrow vessels predominate. West et al. calculated the minimum mass  
024 of a mammal to be  $\sim 1$  gram, based on cardiovascular parameters; this is similar to that of the smallest known mammal,  
025 the shrew (West et al., 2002). West's concept assumes that the organism utilizes a fractal-like vascular system, and is not  
026 applicable to organisms such as Hydra which exchange nutrients, gases, and waste by simple diffusion.

027 Although the allometric relationships between BMR and  $M_b$ , and lifespan and  $M_b$ , at the species level are well established  
028 and accepted, these describe only general trends; they do not hold true for all species. Clearly, the described allometric

relationships are not imposing a strict, specific value for peak power density, metabolic rate, or lifespan on a species or individual based solely on body mass. Rather, they appear to establish median values (averaged across a range of species) together with upper and lower theoretical bounds on these factors. The optimal compromise between peak power density, longevity and body size for a given species evolves within these general constraints towards the configuration that maximizes species fitness. Deviations from the general relationships should be expected. For example, a species living in an environment with low predatory pressure may receive a fitness benefit from sacrificing peak athletic performance for increased longevity. Suppose that in this case, it is not necessary for the organism to function anywhere near the metabolic limit dictated by its capacity for heat exchange to ensure high rates of survival and fecundity over its lifespan—it receives more fitness benefit from maintaining a reasonable level of fecundity over an increased lifespan than from a marginal decrease in predation over a shorter lifespan. Another example of an expected significant deviation from the median are situations where organisms utilize a specific behavioral tactic or enhanced cognitive capabilities to increase their survival odds in lieu of maximizing peak power density. Humans are the ultimate embodiment of such a strategy.

Although BMR correlates with longevity across a wide range of organisms, no significant correlation remains in either eutherians or birds after correcting for body mass and phylogeny (de Magalhães et al., 2007). One possible explanation for this can be derived from the fact that peak power density, which may be a primary high-level longevity determinant, need not correlate exactly with BMR. BMR measures the amount of energy used while an organism is at rest. Field metabolic rate (FMR), which also scales allometrically with  $M_b$ , takes into account BMR as well as thermoregulation and activity costs. Even within the same class, FMR allometric scaling slopes are frequently different from BMR slopes (Nagy, 2005). FMR will correlate more closely with peak power density than BMR will because FMR values always exceed BMR and thus are closer to peak sustainable metabolic levels (which is a better measure of peak power density). Even so, FMR still represents a time average of metabolism; organisms that exhibit short periods of very high metabolic activity (and hence possess higher peak power density) could have similar FMR to those that have much lower peak power density but more consistent levels of metabolism, and vice-versa. This offers a reasonable explanation for how peak power density can still be a longevity determinant and correlate with BMR across species and within distinct phylogenetic groups, even if BMR does not correlate with longevity after correcting for body mass and phylogeny.

Birds have higher BMRs than mammals, yet they live on average approximately three times as long as similar-sized mammals. Many of the same arguments just mentioned could help explain this discrepancy. Of course, the thermal physiology of mammals and birds is vastly different and this could contribute to the variation in longevity as a function of BMR. As pointed out earlier and in agreement with the notion that peak power density is a primary longevity determinant, a common trend line predicts MLSP as a function of mitochondrial membrane peroxidation index with similar accuracy for both birds and mammals (Hulbert et al., 2007).

These generalized allometric relationships also do not hold universally when examining the individuals within a species. For example, larger individuals in some species, such as dogs (Speakman et al., 2003) tend to have shorter lives than smaller individuals. This may be in part because longevity determinants have evolved, and are genetically engrained, at the species level; in other words, the genetic elements that specify peak power density, membrane composition, biomolecular turnover rates, stem cell reserve levels, and other factors that contribute towards resisting (or promoting) permanent thermodynamically-induced changes in biocomponents subject to irreversible losses are mostly preset within the genome of a species and do not vary significantly as a function of body size. It is not surprising that significant deviations from the median body size would result in a compromised individual—and that this would include decreased longevity.

## 068 8 Longevity Optimization

069 With sufficient time, the loss of mutual DNA information must lead to performance deficits in the individual. Mitochondrial  
070 energy production efficiency will be compromised as a result of loss of mitochondrial mutual DNA information, while  
071 losses in nuclear DNA are expected to eventually result in a mosaic of random cellular dysfunction.

072 Once mitochondrial dysfunction has progressed to the point that resource deficits prevent the funding of all cellular  
073 processes at youthful levels and/or genetic redundancies are no longer able to sufficiently compensate for other losses in  
074 genetic fidelity, an aged phenotype must begin to take shape. It is reasonable to expect that the optimal allocation of  
075 resources for preserving maximal survival and fecundity in an aged individual would be different than the configuration  
076 used in young adulthood when adequate resources are available to fully fund all cellular processes. Factors most critical  
077 to immediate survival are of highest priority to the individual. Therefore, a genotype optimized for an aging individual  
078 could be predicted to increasingly deprioritize less vital processes and biocomponents as useable energetic resource  
079 availability decreases and dysfunction increases so that more critical biocomponents are preserved in states that are  
080 adequate to sustain life and maximize survival potential and fecundity. Eventually, a state will be reached where even vital  
081 factors cannot be adequately sustained and the individual's overall condition becomes un conducive to continued life.

082 Could an anti-aging strategy such as the one described above exist in multicellular organisms? A large number of genetic  
083 elements regulating pathways that appear to be related to longevity have been identified (ENCODE Project Consortium et  
084 al., 2007). Many scientists believe that these pathways are largely responsible for stipulating the presence of aging and  
085 for modulating the rate of aging between species (Austad, 2009; Holliday, 2010; Kirkwood, 2005; Vijg and Campisi, 2008).  
086 A proposed complementary hypothesis is that longer-living species have evolved to contain superior mechanisms and/or  
087 biomolecules for retarding senescence; some scientists believe that incorporation of these changes into shorter-living  
088 organisms could lead to delayed senescence in these other organisms as well.

089 I submit here an alternative theory proposing that a major function of the putative aging pathways is the optimization of  
090 the process of aging to maximize individual longevity and fecundity, and that this is an evolved response. Contained within  
091 these pathways, genetic elements that I term "longevity optimizers" work together to elicit a balanced response to the  
092 unavoidable progression towards increasing levels of biomolecular fidelity loss.

093 To my knowledge, this concept has not been previously discussed or proposed in published literature. There are several  
094 likely reasons for this. Firstly, it is not generally acknowledged that the aging of an individual is unavoidable. Many popular  
095 aging theories (e.g. antagonistic pleiotropy, mutation accumulation, and disposable soma) utilize evolutionary concepts  
096 to justify the existence of aging in the individual and do not incorporate universal law or approach the problem in a  
097 multidisciplinary fashion. These theories claim that aging is not unavoidable but rather that it exists because it projects  
098 beneficial effects on species fitness in other ways (antagonistic pleiotropy, disposable soma) or that there is insufficient  
099 evolutionary pressure to eradicate aging (mutation accumulation). If aging in multicellular organisms is not mandated by  
100 physical law, then there is no need for mechanisms and strategies to resist or optimize it.

101 Here, rationale and evidence has been provided for why aging is in fact an inevitable consequence of physical law that  
102 cannot be overcome by evolution. If this is the case, then it is reasonable to propose the existence of evolved mechanisms  
103 to resist and optimize an organism's susceptibility to these effects in order to maximize fitness. For reasons explained in  
104 detail in the following sections, I believe that the argument is strong that such mechanisms exist.

105 A counterargument is that aging optimizations are unlikely to evolve because selective pressures begin to decrease once  
106 an organism has reached the age of reproductive maturity. However, as the potential for loss of mutual DNA information  
107 begins at conception—not at reproductive maturity—this phenomenon must be suitably combatted at all life stages. Even  
108 if selective pressures were entirely absent past the age of reproductive maturity, in order to maximize fitness an organism  
109 would require strategies for preventing the loss of mutual DNA information from reaching excessive levels and to best  
110 handle the mutual DNA information loss that has occurred at all life stages up to this age.

## 8.1 Selective Pressures Favor Genotypes that Attenuate Increases in Mortality and Losses in Fecundity Occurring After Reproductive Maturity

Germline mutations are only rarely beneficial to the organism. Similarly, we can confidently state that, in the absence of compensating mechanisms, any somatic mutation or other form of irreversible degradation to a necessary biocomponent will nearly always impact an individual's instantaneous mortality rate and/or fecundity negatively or, at best, neutrally. Therefore, the integrative effect of the systemic degradation occurring with age must have negative repercussions for an individual.

In any aging individual organism, those biocomponents that are susceptible to irreversible fidelity losses will be the first biocomponents to incur shifts from their youthful homeostatic states; for most organisms with at least moderate lifespans this is likely to be DNA molecules. The continual loss of mutual DNA information must eventually force shifts in the degradation state of other biocomponents—biomolecules, cells, tissues, etc. The magnitude of any deleterious impact on individual instantaneous mortality rate and fecundity due to an increase in the degradation state of a biocomponent will vary depending on the function of the biocomponent and the extent of the shift in degradation state.

What are some potential biological responses for minimizing the negative repercussions of unavoidable fidelity loss with age? One such strategy for maximizing survival rate and fecundity in these conditions is a genotype that prioritizes minimizing the degradation state, or that reduces the failure likelihood, of biocomponents most critical to these parameters. We will examine whether such a strategy would be evolutionarily favored.

Hamilton (1966) exploited the Euler-Lotka equation (Euler, 1767; Fisher, 1930; Lotka and Sharpe, 1911) to derive a measure of fitness  $r$  from age-specific survival and fecundity rates.

$$\int_0^{\infty} e^{-rx} l(x) m(x) dx = 1 \quad (23)$$

Here  $l(x)$  represents survival up to age  $x$  and  $m(x)$  is fecundity at age  $x$ . Using a similar framework, Fisher (1930) introduced the concept of age-specific reproductive value  $v(x)$  with the following relation

$$v(x) = \int_x^{\infty} e^{-r(y-x)} \frac{l(y)}{l(x)} m(y) dy \quad (24)$$

Fisher (1930) described reproductive value as a measure of the contribution of individuals of age  $x$  to the future ancestry of a population and stated that (p.27) "the direct action of natural selection must be proportional to this contribution". In other words, genotypes that maximize reproductive value for a given age will be favored by selection over those that produce a lower  $v(x)$ —thus maximizing fitness. Fisher also discussed why reproductive value typically increases from birth before reaching an apex and then declining at more advanced ages. He demonstrated this trend with human population data.

138 Let us examine some plots of reproductive value with age for a hypothetical organism with slightly different genotypes.  
139 Assume that in this organism,  $m(x)$  peaks near reproductive maturity and declines after this age. Also assume that  
140 mortality increases from this point forward, accelerating the rate at which  $l(x)$  is decreasing with age. We will assume  
141 that irreversible fidelity loss is the primary driver of these reductions in  $l(x)$  and  $m(x)$ , aside from a baseline constant  
142 mortality rate. In Fig. 9a, the red curve depicts a reproductive value curve for this organism with a genotype that does not  
143 incorporate any elements for optimizing fecundity and/or survival in response to irreversible losses in fidelity. If the same  
144 values for survival and fecundity up to the age of reproductive maturity are used but losses in  $l(x)$  and  $m(x)$  occurring

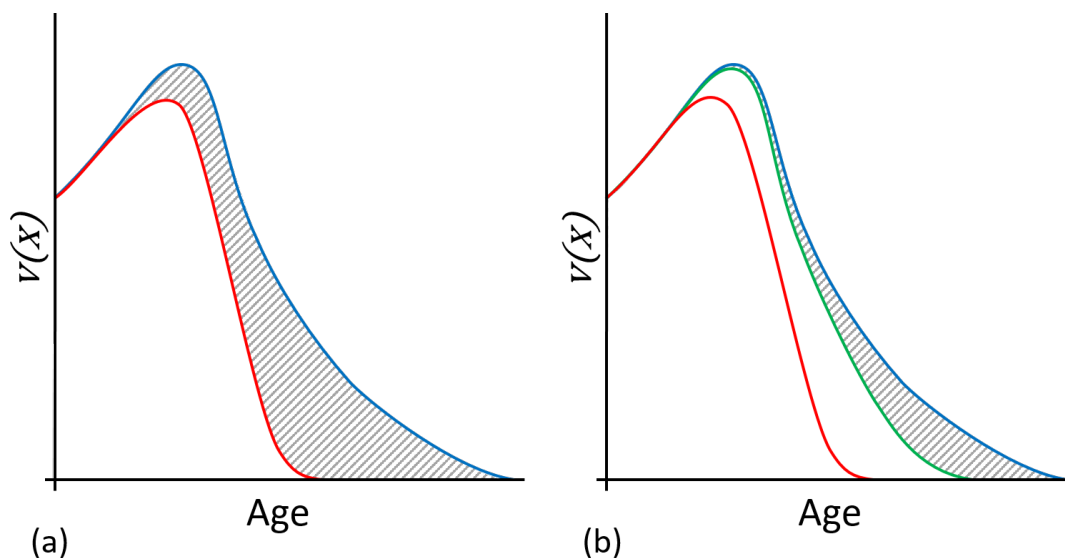

Fig. 9. Two scenarios of reproductive value curves for a hypothetical organism. (a) Optimization (blue curve) of the organismal response to deterioration effects (as detailed in text) will provide a fitness advantage compared to a genotype lacking longevity optimizers (red curve), due to the increase in reproductive value depicted by the grey shaded region. (b) Variations on optimization. Three genotypes are illustrated: no longevity optimization (red curve), optimal longevity optimization (blue), and partial longevity optimization (green). All curves were modeled according to parameters described in text and using Eqs. ( 23 ) and ( 24 ). Curves depict calculated trends.

145 after this age are attenuated, peak reproductive value will increase, occur at a later age, and reproductive value will be  
146 maintained longer (Fig. 9a, blue curve). Due to the positive contribution to reproductive value, genes/genotypes that  
147 attenuate the described pattern of losses in  $l(x)$  and/or  $m(x)$  will be evolutionarily favored (i.e. they will increase fitness),  
148 provided they do not negatively influence early reproductive value. Therefore, if genes that attenuate reductions in  $l(x)$   
149 and  $m(x)$  occurring after reproductive maturity due to irreversible fidelity loss exist, then it is likely that these genes will  
150 be selected for and incorporated into an organism's genome.

## 151 8.2 Deterioration Management Strategies

152 It is illogical for an organism to have evolved such that fecundity or mortality are negatively affected (at ages where  
153 selective pressure is still above some minimal threshold) due to the disproportionate deterioration, or increased likelihood  
154 of failure, of one or a small number of vital biocomponents. As demonstrated in the previous section, selection would  
155 favor genotypes that avoid susceptibility to the catastrophic failure of a small number of weak links.

156 I propose that through evolution, organisms have developed cellular mechanisms and pathways for managing inevitable  
157 degradation afflicting an aging individual, due to thermodynamically-explained phenomena, in a progressive and dynamic  
158 manner. Biocomponents most susceptible to degradation effects, and most critical to survival and fecundity, are  
159 prioritized. To illustrate this concept, two terms will be utilized: "managed deterioration" and "unmanaged deterioration".

160 With unmanaged deterioration, the degradation of critical singular biocomponents would occur at a rate proportional to  
161 the biocomponent's susceptibility to irreversible fidelity loss due to internal entropy production, or the direct and indirect  
162 effects of degradation present in other components (Fig. 10, left). Regardless of their importance to instantaneous

mortality rate or fecundity, the most susceptible components would reach failure levels first—leading to premature reductions in survival probability and fecundity—while other components could still remain at relatively high performance levels (i.e. low degradation states).

In managed deterioration, longevity optimization genes could modulate the rate of deterioration of different biocomponents so that biocomponents of similar importance degrade at comparable rates and/or reach their failure threshold at equivalent ages. Critical biocomponents would be prioritized. Thus, the age at which any one biocomponent reaches a level that compromises fecundity or survival probability is delayed—effectively increasing longevity and overall fitness (Fig. 10, right). This could be accomplished by several means, including:

1. Reallocation of resources, at the cellular level and higher, as usable energetic resource availability becomes compromised to prioritize those biocomponents most important to preserving reproductive value.
2. Adjustment of microenvironmental conditions to decrease the thermodynamic potentials on more vital biocomponents and thereby lower the rate of damage-inflicting internal entropy production.
3. Reduce biocomponent turnover rates to delay the clonal expansion of irreversibly compromised biocomponents (effectively reduces the rate of mutual information loss).
4. Alter physiology such that stresses on more vital biocomponents are reduced and maintained below their operating limits, resulting in a decreased likelihood of failure of biocomponents most critical to preserving fecundity and mitigating increases in mortality.

One possible example of items (2) and (3) is the way by which mutual mtDNA information loss may be attenuated by controlled decreases in mitochondrial fusion and fission in aging individuals. This can be demonstrated by examining the “Mitochondrial Infectious Damage Adaption” (MIDA) model proposed by Figge et al. (2012). Using a probabilistic modelling approach, they showed that the decrease in mitochondrial fusion and fission rates seen with increasing age preserves average mitochondrial quality and delays the age at which mitochondrial quality drops below the minimal level required for cell viability. In short, the age-linked reduction of mitochondrial fusion and fission rates may attenuate mutual mtDNA information loss by reducing the exposure of mtDNA molecules to the high thermodynamic stress conditions encountered during replication and delaying the spread of parasitic mutated mtDNA molecules.

A downside to decelerating mitochondrial fusion/fission rates is that these processes are integral to mitophagy (Twig et al., 2008; Youle and Narendra, 2011). Mitophagy serves to remove the mitochondrial mutants that are detectable (Kowald and Kirkwood, 2011) but is also believed to be critical in preserving the quality of mitochondrial components by segregating deteriorated components, such as lipids and protein, into mitochondria that will be targeted for destruction. Therefore, a reduction in fusion/fission rates increases the load of ROS products and otherwise damaged mitochondrial components, compromising overall mitochondrial quality. The combination of reduced mitochondrial fusion/fission and the loss of mutual mtDNA information results in mitochondria in aged organisms that produce less usable energy (Yaniv et al., 2013).

Since mutual mtDNA information loss is inevitable, preserving a constant mitochondrial fusion/fission rate will still result in the eventual loss of mitochondrial quality. However, Figge et al. (2012) demonstrated that decelerating mitochondrial dynamics actually preserves mitochondrial quality and extends the limit on longevity implied by mitochondrial dysfunction; this is evidently because the resulting reduction in the rate of mutual mtDNA information loss is more critical to preservation of reproductive value than the tradeoff of increased degradation state in other mitochondrial biocomponents. In the context of the current discussion, the genes responsible for realizing this strategy would be considered longevity optimizers.

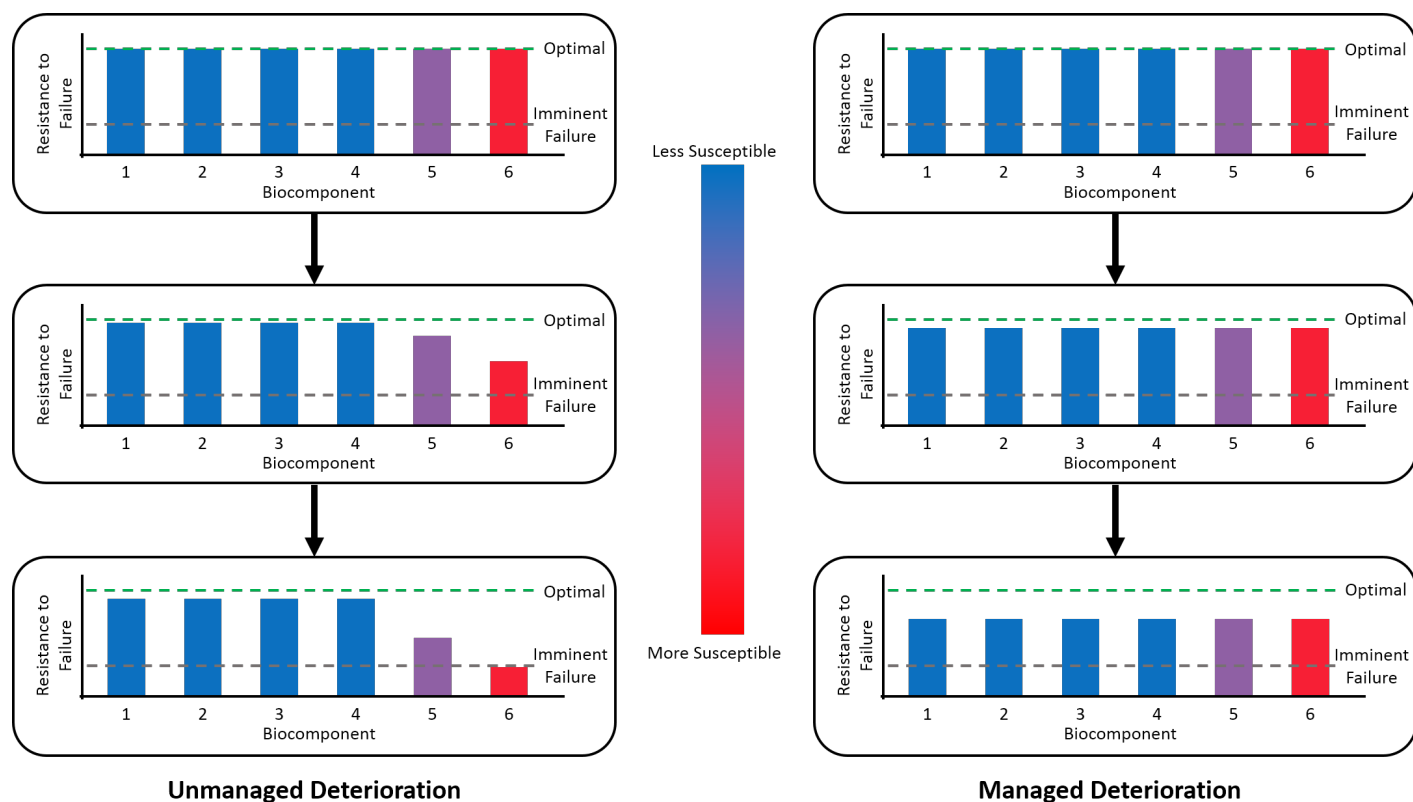

Fig. 10. Demonstration of unmanaged (left) and managed (right) deterioration strategies. A group of arbitrary biocomponents, equally vital to an organism's fecundity/survival, are depicted. Three ages are considered: Top—Young Adult, Center—Middle-Age, Bottom—Elderly. 'Red' indicates that a biocomponent is very susceptible to irreversible degradation (which could be due to direct and/or indirect effects), while 'blue' signifies that a biocomponent has very little or no susceptibility to irreversible degradation. The vertical axis depicts how resistant a biocomponent is to failing, given its current degradation state. In unmanaged deterioration, biocomponents will approach imminent failure at a rate proportional to their susceptibility to irreversible fidelity loss. Biocomponents most susceptible to irreversible degradation will reach failure levels first and the organism will die prematurely. With managed deterioration, longevity optimization genes produce adjustments in the aging individual which partially offset decreases in resistance to failure of the most vital and susceptible biocomponents (details in main text). By not allowing any one vital factor to reach the imminent failure state at an earlier age than others, managed deterioration strategies may enhance longevity and increase fecundity.

203 Skeletal muscle mass has been shown to decrease substantially with age (Grounds, 1998). The loss of muscle mass with  
 204 age is generally regarded as a purely undesirable physical manifestation of aging. Along this line of thinking, a safe and  
 205 effective therapeutic intervention capable of preventing or attenuating age-related skeletal muscle mass loss is commonly  
 206 viewed as something that would be desirable and beneficial for the health of the elderly. For example, a substantial body  
 207 of evidence suggests that the loss of function in satellite cells is a proximal cause of age-related muscle mass loss (Carlson  
 208 and Conboy, 2007; Sousa-Victor et al., 2014) and interventions have been proposed to "correct" this deficiency (Carlson  
 209 and Conboy, 2007; Dumont et al., 2015; García-Prat et al., 2013; Sousa-Victor et al., 2014; 2015).

210 I propose that an alternative path of reasoning should be considered for explaining this, and perhaps other, age-linked  
 211 traits. Given that cardiac output declines significantly with age in humans (Brandfonbrener et al., 1955) and is rooted in  
 212 functional deficits at the cardiomyocyte level (Guo and Ren, 2006), a reduction of skeletal muscle mass will lower the  
 213 stresses on an age-compromised heart by reducing the volume of blood in the body and decreasing the contractile forces  
 214 required to circulate the blood. This raises the possibility that a decrease of skeletal muscle mass with age is a beneficial,  
 215 evolved response—or at least a tolerated condition—which reduces cardiovascular stress and lowers the mortality risk of  
 216 cardiac events. This is one example of how age-dependent physiological alterations could decrease the likelihood of failure  
 217 of more critical biocomponents in light of inevitable degradation, as proposed in item (4) from the above list, and serve to

218 extend longevity. To be clear, this hypothesis is not intended to explain extreme muscle wasting outside of normal age-  
219 related trends, which is undoubtedly a genuine pathological condition. In addition, there are certainly a number of  
220 undesirable aspects of age-related skeletal muscle dysfunction. The concept being put forth is the idea that age-dependent  
221 physiological alterations, even those that at first glance appear purely detrimental, may actually serve a purpose in  
222 establishing an optimally balanced configuration in the face of inevitable, and progressively increasing, degradation in the  
223 individual.

224 It is prohibitively difficult to directly establish that the altered age-dependent expression of one gene represents an  
225 evolutionarily established tradeoff with some other gene(s) that extends longevity, as suggested by item (1). The reason  
226 for this is the sheer number of genes, which renders establishment of any correlation a highly multifactorial problem.  
227 However, beyond the evolutionary argument for their existence, there is other evidence suggesting that mechanisms of  
228 this type may exist—specifically, features of the proteomic, gene expression, and epigenetic signatures that have been  
229 found to characterize aging individuals.

230 A meta-analysis of gene expression profiles from mice, rats and humans revealed a characteristic age-associated pattern  
231 of changes in expression of specific genes (de Magalhães et al., 2009). These differential expressions were consistent  
232 across all three species and across multiple tissue types examined. Specific biological processes and functions were  
233 associated with this meta-signature. Lysosomal genes were one group found to be overexpressed with age. This could  
234 represent an adaptive mechanism for counteracting the increased degradation state in proteins (since, due to reductions  
235 in usable energetic cellular resources, protein turnover is reduced with age). A result of decreased protein turnover is that  
236 a greater proportion of proteins may degrade to the extent that they are not effectively ubiquitinated or processed by  
237 proteasomes and must be recycled by other means, i.e. by lysosomes. Although the energetic resources dedicated to  
238 increased lysosomal expression could have been allocated to lessening the severity of the general reduction in protein  
239 turnover, it may be that age-dependent lysosomal overexpression optimizes the overall protein degradation state based  
240 on energetic resource availability and that this represents the best compromise for maximizing reproductive value. A  
241 proteomic analysis of human fibroblasts from healthy adult female donors from 3 age groups (young: 20-30 years; middle-  
242 aged: 40-50; older: 60-70) revealed 43 proteins with age-associated abundance changes (Waldera-Lupa et al., 2014).  
243 Interestingly, this included two proteasome subunits that were significantly down-regulated and two heat shock proteins  
244 that were up-regulated. This further supports the possibility that age-linked responses have evolved that minimize protein  
245 degradation state via optimization of resource allocation.

246 Epigenetic studies have also demonstrated the presence of characteristic aging signatures. DNA methylation expression  
247 patterns have been shown to change across the human lifespan in line with chronological age (Bell et al., 2012; Bocklandt  
248 et al., 2011; Boks et al., 2009; Christensen et al., 2009; Christiansen et al., 2015; Florath et al., 2013; Garagnani et al., 2012;  
249 Gentilini et al., 2012; Hannum et al., 2013; Heyn et al., 2012; Horvath, 2013; McClay et al., 2013; Rakyan et al., 2010).  
250 Predictors have also been developed that can reliably estimate the age of human cells from any human tissue type based  
251 on epigenomic DNA methylation profiles (Hannum et al., 2013; Horvath, 2013). One of these predictors has also been  
252 demonstrated to be applicable to chimpanzees, although less so to gorillas (Horvath, 2013). Importantly, a significant  
253 correlation was also observed between cell passage number and predicted age in both induced pluripotent and embryonic  
254 stem cells. This supports the notion that age-related epigenetic signatures do not simply represent accumulated regulatory  
255 dysfunction, but that at least some component of this signature represents a progressive and dynamic response to the  
256 loss of mutual DNA information—possibly through a telomere-related mechanism. Furthermore, a number of  
257 characteristic age-related epigenetic changes have been found to be tissue-type dependent (Christensen et al., 2009;  
258 Thompson et al., 2010), supporting the hypothesis that longevity optimization may extend to the tissue-level.

259 In sum, the above findings support the feasibility of the notion that an age-associated reallocation of resources indeed  
260 occurs and is not limited to the cellular level but functions with some degree of tissue specificity (item 1 from above list).  
261 These findings also further support the existence of items (2), (3), and (4).



### 8.3 Longevity Optimization Strategies from Early Adulthood May Serve as Templates for Those Used in Later Life

The theory advanced here proposes that selective pressures have led to the evolution of genetic optimizations that attenuate the rate of loss of mutual DNA information and the detrimental effects of these losses in aging individuals. There can be little doubt that in the face of inevitable and progressive degradation, a diverse array of intermediate configurations would be required to realize optimal aging during all stages of life. As compromised biomolecules reach non-trivial levels even during early adulthood (Ben-Zvi et al., 2009; Greaves et al., 2014), it is reasonable to propose that longevity optimizers have evolved to incorporate complex modulatory strategies to ensure optimal adjustments to the corresponding overall state of an aging individual.

This suggests that evolved, early adult-life longevity optimization pathways may serve as the basis for at least some of a late-life longevity optimization strategy. It could be largely through the extrapolation of these early adult-life mechanisms that the maximal lifespan of an organism is able to extend well beyond the age of peak reproductive value, particularly in species such as humans where older individuals are kept in protected environments. The use of pre-existing genes and pathways as a basis for later-life optimizations may also explain how genetic elements could evolve to a highly optimized state for relatively advanced ages, even though selective pressure decreases with age (Hamilton, 1966; Medawar, 1952; Williams, 1957). If genes and pathways for early adult-life longevity optimization were already present within an organism's genome, the extension of these strategies for late-life longevity optimization may require considerably less selective pressure.

Since selective pressure does decrease with age, it would likely still require an extremely long time for very late-life longevity optimizations to evolve to fully maximize longevity extension potential. Therefore, it could be predicted that longevity optimization in any given organism will be somewhat below ideal. This concept is illustrated in Fig. 9b. Utilizing a hypothetical organism with survival and fecundity parameters similar to those described in section 8.1, it can be shown that a genotype lacking any longevity optimization will exhibit a relatively steep drop in reproductive value with progressing age after the age of peak reproductive value (red curve). Incorporating longevity optimizer genes capable of maximally attenuating losses in fecundity, and increases in mortality, with age into the same organism will preserve higher reproductive values into later ages (blue curve). Now suppose that longevity optimization is close to ideal for ages near peak fecundity but becomes progressively less ideal as age increases and selective pressure decreases; this would result in a reproductive value curve between the two described extremes (green curve). I propose that this last curve is representative of the evolved state of the typical metazoan. The gray shaded region thus represents the "intervention potential"—the maximal gains in reproductive value attainable by further genetic longevity optimizations or through artificial manipulation of individuals (i.e. drugs and therapies, excluding therapies that replenish mutual DNA information). Although beyond the scope of the current discussion, by examining statistics of proportionate mortality by pathological condition and other population data, it may be possible to predict the ideal longevity optimization curve for a particular organism (blue curve in Fig. 9b).

### 8.4 Entropy-Driven Managed Deterioration in Further Detail

It is theorized here that metazoans have evolved to make compensatory adjustments as individuals age so as to minimize the deleterious effects of thermodynamic phenomena on reproductive value—resulting in survival, for the moment, but nonetheless unable to avoid an ever-increasing negative phenotype. These longevity optimizers may protect the biocomponents of an organism at all levels (biomolecules, cells, tissues, and organs) that are most critical to immediate survival and fecundity by sacrificing other aspects of health, leading to a diverse "spread the misery" phenotype. In essence, the diversity of the biocomponents affected during aging and the relatively high degree of conservation of the aging phenotype across taxa may be largely manifestations of these compromises. A more detailed depiction of this theory links further aspects of the aging process (Fig. 11).

MtDNA mutations are ubiquitous in aged mammals (Wallace, 1999), equating to the loss of mutual mtDNA information with age. The described theory incorporates the concept that these losses, resulting from the effects of the second law, are a driving force towards the deceleration of mitochondrial fusion/fission, **1** (bold numbers in this section refer to Fig.

11)—mitigating, but unable to prevent, further losses in mutual mtDNA information. This deceleration is metered (Figge et al., 2012) in response to an ever-increasing systemic mutational load (Cao et al., 2001; Kennedy et al., 2013; Kraytsberg et al., 2006). As an individual ages, losses in mutual mtDNA information and reduced fusion/fission rates lead to elevated levels of mitochondrial ROS products and compromised mitochondrial components (increased degradation state), **2**. This reduces the peak amount of usable cellular energy (ATP) that a mitochondrion from an aged individual can produce (Yaniv et al., 2013), **3**. This deficit becomes progressively worse with age.

Once mitochondrial dysfunction exceeds a threshold, youthful homeostasis can no longer be preserved. A shortage of sufficient ATP to fund all cellular processes at youthful levels results in the aforementioned reallocation of resources and physiological alterations, **4**. I propose that these adjustments have evolved, are balanced and adaptive, and are largely signified by the epigenetic state of a cell—which has been found to have distinctive signatures for different ages (Bell et al., 2012; Bocklandt et al., 2011; Boks et al., 2009; Christensen et al., 2009; Christiansen et al., 2015; Day et al., 2013; Florath et al., 2013; Gentilini et al., 2012; Hannum et al., 2013; Heyn et al., 2012; Horvath, 2013; McClay et al., 2013; Rakyan et al., 2010; Thompson et al., 2010). The resulting age-dependent epigenetic signatures should not be confused with epimutations, where distribution is mostly random (Heyn et al., 2012).

Protein production is slowed in the cells of an aging animal (Ben-Zvi et al., 2009) and fewer resources are dedicated to maintaining the proteome (Douglas and Dillin, 2010; Hwang et al., 2007). These mandatory energy-conserving events reduce the ability of cells to counter the degradative effects of internal entropy production and to preserve youthful biomolecular homeostasis, leading to a continuous but slowly accelerating increase in biocomponent degradation states, **5**. This is exemplified by the increased levels of damaged, misfolded and polymerized proteins seen with age (Balch et al., 2008). Since ATP is also required to help protect the nuclear and mitochondrial genomes from permanent losses, nuclear and mitochondrial DNA integrity is gradually further compromised as usable energy becomes more scarce, **6**, as demonstrated by higher sustained levels of unrepaired damage (Bailey et al., 2004; Wallace, 1999). This increases the probability of sustaining further permanent losses in mutual DNA information.

Losses in mutual nuclear DNA information with age contribute to increased cell-to-cell stochasticity in gene expression (Bahar et al., 2006) and clonal mosaicism (Lodato et al., 2015), causing average cellular performance to decrease. The loss of mutual DNA information will also decrease stem cell viability and consume stem cell reserves, in addition to generating losses in the number and viability of nonmitotic somatic cells, **7**.

Dysfunctional telomeres can activate the DNA damage response pathway, engaging tumor protein p53 and leading to promotion of apoptosis or replicative senescence (Deng et al., 2008). Telomere attrition is upregulated in aged cells (Passos et al., 2007). This is an evolved mechanism, distinct from the length reduction that occurs during replication, believed to partially offset the increased likelihood of developing cancerous mutations in age-compromised cells (Campisi, 2005), **8**. This adaptive response involves the preferential degradation of telomeric DNA in conditions of increased mitochondrial superoxide production (Passos et al., 2007; Petersen et al., 1998; Zglinicki, 2002), as occurs with aging.

Epigenome maintenance is downregulated in aged mammals (Cencioni et al., 2013). As internal entropy production will continue to result in insults to the once tightly-regulated epigenome and fewer resources are dedicated to its maintenance, the number of unrepaired spontaneous epigenome mutations will increase with age (Chambers et al., 2007), **9**. This, combined with the downregulation of conventional DNA damage repair mechanisms (Beerman et al., 2014; Zhang et al., 2010), contributes to an ever-increasing risk of developing cancer (Hansen et al., 2011), as seen with advancing age (American Cancer Society, 2013).

346 Inevitably, the result of cellular component-level degradation will be compromised cellular performance, **10**—albeit less  
 347 overall performance loss than if the damage had not been apportioned. This loss in cellular performance will lead to a  
 348 concomitant loss in performance of the macro structures that they constitute: tissues, **11**, organs and the overall organism.  
 349 Cells will also be compromised in their ability to perform specialized functions—leading to inflammation, compromised  
 350 immune function and increased susceptibility to disease.

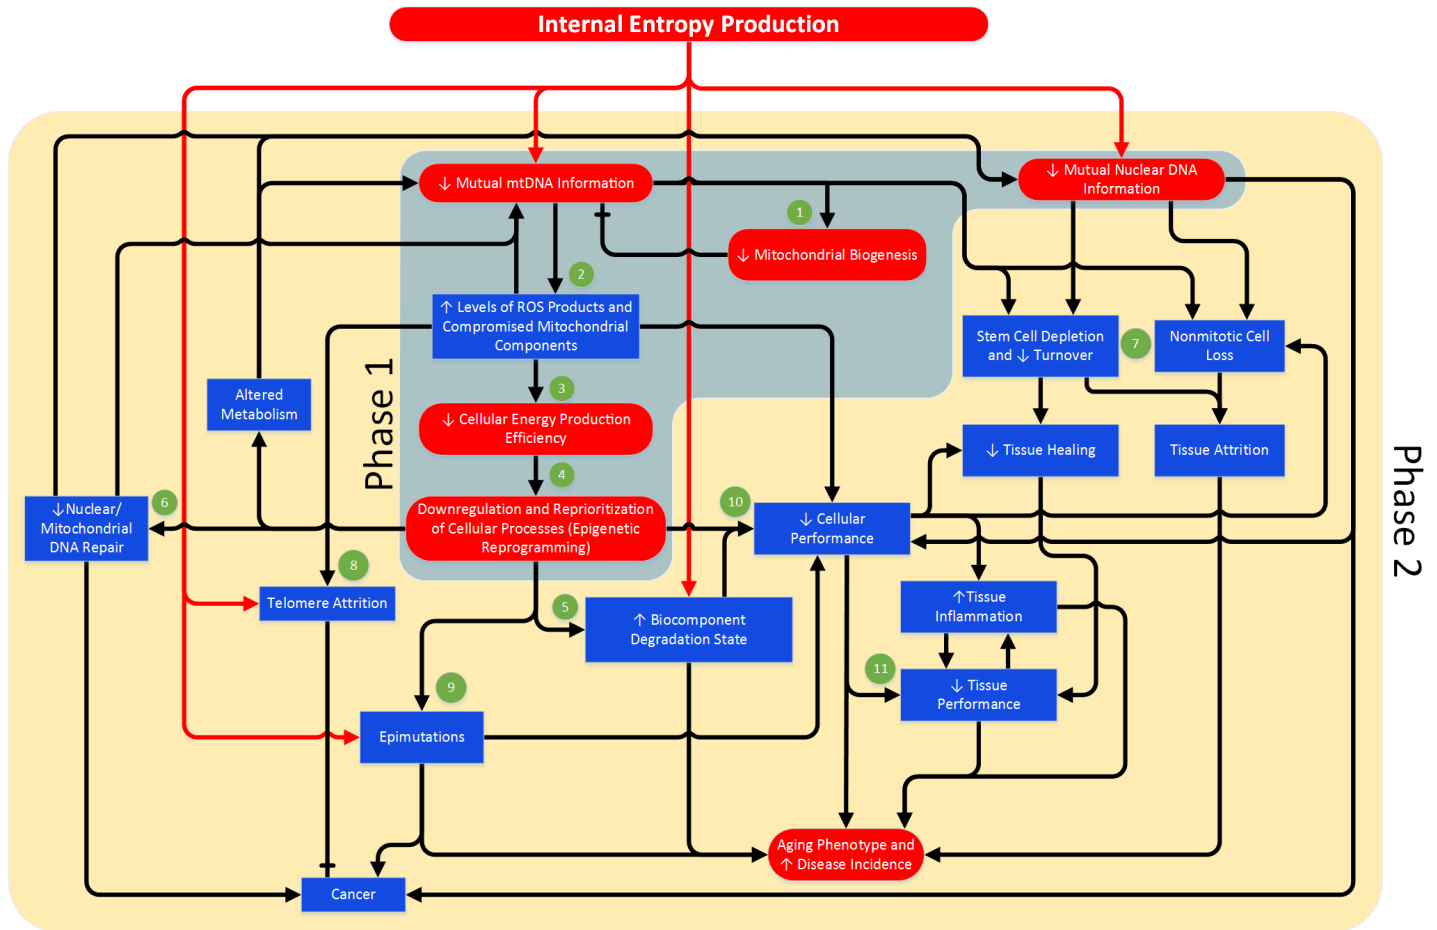

Fig. 11. A more detailed look at the higher-level interactions implicated in this theory during the progression of the aging phenotype. The red lines are used to highlight where the degradative effects of internal entropy production are exerted. Bold numbers in section 8 text refer to this figure.

## 351 9 Connecting the Dots

### 352 9.1 Differentiating between Longevity Determinants and Longevity Optimizers

353 It is proposed here that two groups of factors specify intrinsic longevity in individuals of a species: 1) longevity  
 354 determinants and 2) longevity optimizers. The first term has been utilized in previous literature but the definition used  
 355 here is somewhat different. It is important to differentiate between these distinct, but occasionally overlapping, groups.  
 356 Longevity determinants are defined as factors that directly or indirectly specify or influence the basal rate of loss of fidelity  
 357 in any biocomponent (biomolecule, organ, tissue, etc.) susceptible to irreversible fidelity loss (such as DNA). This is  
 358 accomplished either by manipulation of the magnitude of the thermodynamic forces affecting these structures, the level  
 359 of redundancy, replication rate, or by influencing the ability of said biocomponents to resist the thermodynamic forces  
 360 present in their microenvironments. The genetic arrangements that ultimately determine an organism's basal longevity  
 361 are driven by universal law and evolutionary factors, and are further contingent on the exact environment and  
 362 environmental interaction factors in which the species exists (Fig. 12). Every genetic factor that specifies a phenotypic  
 363 characteristic that influences the basal rate of aging can be viewed as a longevity determinant, as can the phenotypic  
 364 characteristics themselves. Some of the macro-level characteristics that may be classified as longevity determinants are

365 peak power density, physical size, athletic ability, and metabolic rate. At the micro-level, longevity determinants include:  
366 stem cell reserves, membrane composition, biomolecular performance, biomolecular stability, degree of genetic  
367 redundancy within DNA molecules, and the thermodynamic potentials on biocomponents subject to irreversible fidelity  
368 loss. Environmental determinants of species basal longevity include temperature/climate, resource availability (food,  
369 oxygen, etc.), predation pressure and other factors that mandate tradeoffs between fecundity/mortality and longevity.  
370 Survival strategies, and behavior in general, can also influence basal longevity by providing competitive advantages that  
371 result in reduced negative repercussions associated with characteristics that serve a role in longevity determination.

372 A number of the relationships between longevity determinants and basal longevity across species can be represented with  
373 simple mathematic formulae. For example, the general relationships between longevity and body mass, and longevity and  
374 metabolic rate, are well characterized. At the micro-level, relationships between membrane composition and longevity  
375 are well known. Due to the fact that no single factor alone determines longevity in an organism, it is not surprising that  
376 these relationships are unable to hold invariably across taxa.

377 In contrast to a longevity determinant, a longevity optimizer is any genetic element that increases basal longevity by  
378 contributing towards an affect that generally becomes progressively more dominant over an organism's lifespan and  
379 effectively delays the severity, or rate of progression, of the aged phenotype. As an individual ages, longevity optimizers  
380 reallocate resources and alter physiology such that the organism's overall state maximizes instantaneous survival rate and  
381 fecundity at all ages. In summary, longevity determinants define an organism's basal longevity while longevity optimizers  
382 seek to further maximize longevity through dynamic adjustments during the aging process which ultimately serve to  
383 balance the aging phenotype.

384 Typically, the putative "aging pathways/genes"<sup>7</sup> have been branded as such because they were found to contain genetic  
385 elements which, when altered, modulated longevity in some model organism (often of low complexity, e.g. fruit fly or  
386 nematode) or produced a distinct effect on a characteristic(s) typically associated with the aging phenotype. The problem  
387 with this method of identifying aging pathways/genes is that it fails to incorporate, and does little to elucidate, many of  
388 the high-level factors that are likely involved in the determination of organismal longevity. Observations of singular  
389 connections between genetic elements and particular phenotypes demonstrates only that the gene is responsible for  
390 modulating those characteristics—it should not imply that the gene is responsible for aging, nor does it necessarily reveal  
391 anything about the aging process.

392 I posit that the current catalog of putative aging pathways/genes fails to include a large number of genetic elements  
393 involved in determining longevity; even worse, this has directed research focus away from the high-level factors that are  
394 truly important. For example, physical size implies physiological limits on peak power density and metabolism that must  
395 be balanced with other factors affecting longevity. Yet, despite this and the clear allometry of lifespan across species, the  
396 genetic elements specifying physical size, and aspects of physiology related to physical size, are not generally considered  
397 to be longevity determinants. The logic commonly utilized to identify so-called aging pathways/genes diverts attention  
398 from more overriding principles that may help to explain the differences in longevity between species and instead focuses  
399 on individual components—obfuscating the true relevance of any particular factor to the overall process of aging. For  
400 these reasons, I believe that the current putative aging pathways/genes represent, at best, a grossly incomplete set of the  
401 factors truly relevant to longevity determination.

---

<sup>7</sup> As I subscribe to the belief that aging is a chance-driven catabolic process rather than a genetically-engrained behavior (Hayflick, 2007a; 2007b), I view the terms "aging pathways" and "aging genes" as misnomers. I use these terms here only to make reference to current literature. "Longevity determinants" and "longevity optimizers" are more appropriate terms for these factors, and this is used when referring to concepts discussed in this paper.

402  
403  
404  
405  
406  
407  
408  
409

The framework proposed here attempts to establish a hierarchy to aid in the identification and categorization of the actors involved in the determination of species longevity. Longevity determinants are considered separately from the forces that drive aging (universal law and evolutionary theory) (Fig. 12). The subdivision of longevity determinants into genotypic, phenotypic, and environmental elements allows for a clearer depiction of the interplay between the drivers and these different factors. Longevity optimizers are classified into a separate group as well. Although these elements also affect longevity (they could be thought of as 'secondary' longevity determinants), considering the factors specifying basal longevity separately from those that dynamically optimize the aging process brings further conceptual clarity to the theory of aging presented here.

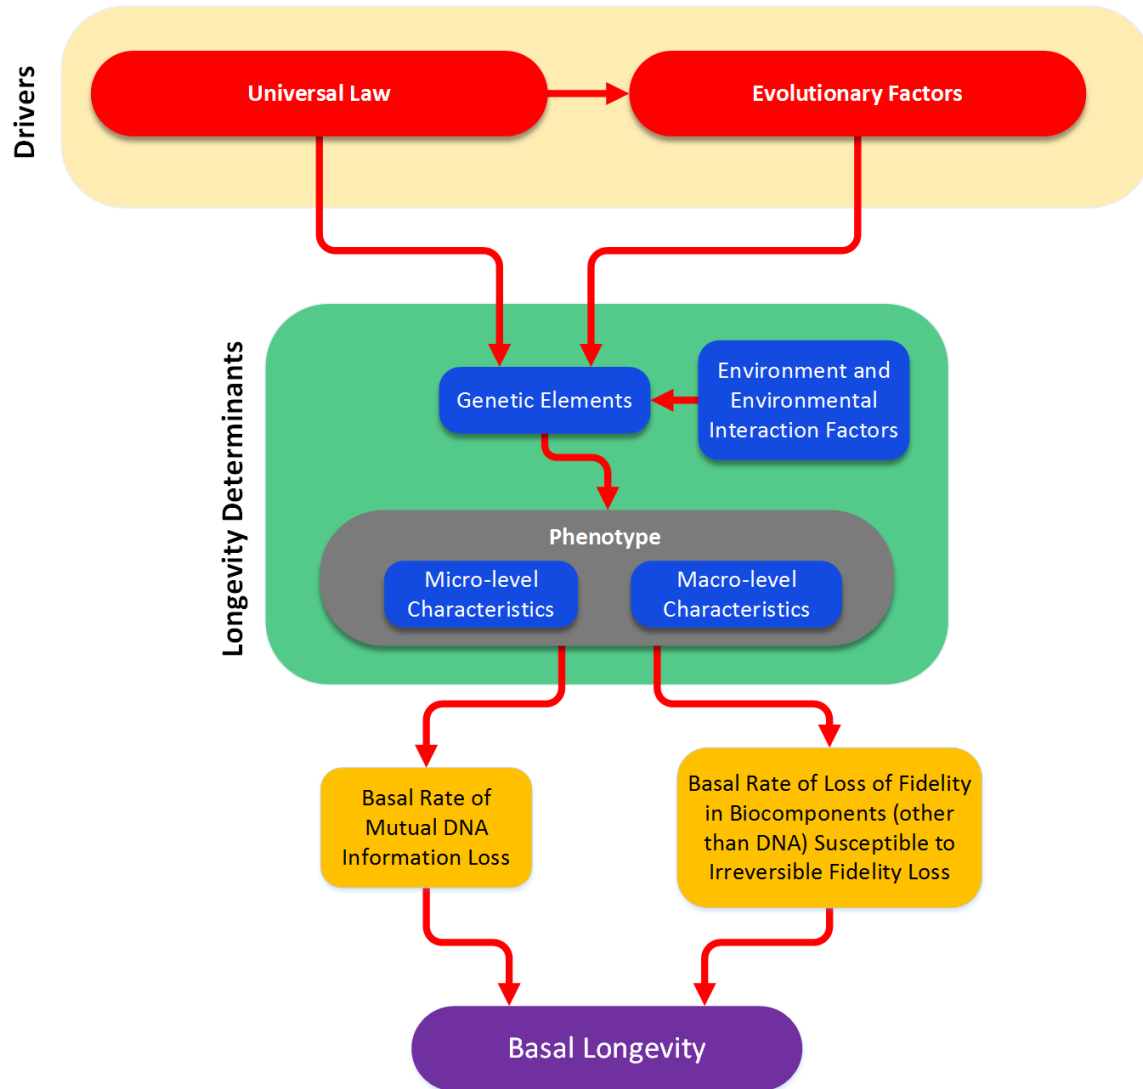

Fig. 12. The proposed relationship between longevity determinants, the root causes of aging (explained by universal law and evolutionary theory) and species basal longevity in multicellular organisms.

## 9.2 The Number of Genetic Elements Serving as Longevity Determinants/Optimizers Likely Correlates Positively with Organismal Complexity

It follows from the previous discussion that highly complex organisms would be expected to possess a larger number of longevity determinants and optimizers compared to less complex organisms. The reasons for this are fairly intuitive and can be explained by considering the characteristics implicated in increasing organismal complexity. Complex organisms are likely to have more cell and tissue types and to have increased specialization in these structures. Cellular interactions are more numerous and more sophisticated. Signaling pathways and their associated biomolecules, though often highly conserved, may utilize additional component derivatives to increase complexity. Due to this sophistication, more complex organisms will tend to have an increased number of opportunities for problems to occur. Complex organisms require additional “protective” mechanisms to temper this increase in vulnerability, further contributing to increased organismal complexity.

As an individual ages, functional deficits will eventually become unavoidable. The repair and replacement of biocomponents less vital to survival or preservation of fecundity may be deprioritized before more vital biocomponents. To minimize the severity of the aging phenotype in an older individual, alterations in resource allocation must be continuous and dynamic, and other physiological adjustments must also occur to effectively prioritize the functionality of those biocomponents most critical to survival. For these reasons, even simple organisms could conceivably display a relatively high level of sophistication in their longevity optimization pathways.

In organisms with a greater number of biocomponents and potential interactions, additional corrective factors must exist to manage these elements and provide an ideal configuration during all phases of aging. Furthermore, these adjustment mechanisms must also allow for a variable and dynamic response, in accordance with an organism’s current state of degradation. This logic suggests that the number of longevity determinants and optimizers should, in general, positively correlate with organismal complexity across species. The FOXO subfamily of forkhead transcriptions factors is a core player in one such conserved pathway that is implicated in longevity, but shows variation in its sophistication (Calnan and Brunet, 2008). While invertebrates have only one *FoxO* gene, there are four *FoxO* family members in mammals, each with distinct but occasionally overlapping functions. *Sirtuins* are another gene family implicated in longevity determination that demonstrate significantly greater diversification in mammals compared to invertebrates.

If there are indeed a greater number of longevity determinants and optimizers in more complex organisms, then it follows that significant lifespan extension in complex organisms would require manipulation of a multitude of longevity determinants and, likely, alterations to longevity optimization pathways. On the other hand, this may explain how the longevity of simple organisms might benefit significantly from manipulation of only one or a few longevity determinants. Examination of conserved pathways known to be related to longevity support this hypothesis. In invertebrates, insulin-like growth factor 1 (IGF-1) and insulin bind to a single receptor, whereas in mammals distinct receptors are used for IGF-1 and insulin. Specific mutations in this receptor can greatly increase lifespan in *Caenorhabditis elegans* (Kenyon et al., 1993; Kenyon, 2010) while lifespan increases in the more complex *Drosophila melanogaster* are much lower (Tatar et al., 2001). Manipulation of the IGF-1 and insulin pathways in mice imparts only a modest increase in lifespan (Blüher et al., 2003; Selman et al., 2008). These observations illustrate the relationship between organismal complexity and the increasingly multifactorial nature of longevity determination.

## 9.3 The Rigidity of Species MLSP

Beyond the supposition that significant lifespan extension in more complex organisms is likely to require manipulation of considerably more elements than in simpler organisms, physiological barriers also constrain the longevity possibilities. It may be possible to assess the plasticity, or rigidity, of MLSP in a species by these two factors: complexity and physiology. Selective pressure has led to highly optimized physiology, based on compromises between other factors affecting fitness (peak power density, physical size, etc.). Consider the potential implications of lowering the mass-specific metabolic rate of a mouse to 1/8<sup>th</sup> its normal rate (approximately that of a human). The physiology of a murine heart is appropriate for the level of performance of the individual murine cardiomyocytes that it is comprised of and for the demands of a mouse

body. Reducing the metabolic rate by such a large amount would likely mandate a loss in the peak power density of cardiomyocytes. These cardiomyocytes would be less able to generate the contractile forces necessary to counter the energy dissipation inherent to the murine circulatory system and hence blood circulation may be insufficient for sustaining life. Only with fundamental changes to the configuration of the vasculature, which would require additional genomic alterations, could this energy dissipation factor be reduced. Yet, even with a configuration optimized for efficiency over performance, viable metabolic rates will be constrained to those values capable of satisfying certain physical requirements. Governing models derived from principles of fluid dynamics have been proposed (West et al., 1997; West and Brown, 2005) that provide an example of this type of phenomenon. Although the circulatory system is perhaps the easiest example to conceptualize, there are many other potential negative physiological implications of manipulating singular longevity determinants such as metabolism. A number of other tissues would be similarly affected in this scenario, such as the liver and brain.

For these reasons I hypothesize that species MLSP exhibits a degree of rigidity that increases with organismal complexity. If accurate, this highlights the naivety of longevity extension efforts to identify and manipulate genes that could significantly extend human lifespan without compromising health or performance, and further explains why longevity extension results do not translate well outside of simple “model” organisms.

## 10 Summary and Conclusions

Aging is the greatest risk factor for all age-related diseases. Yet, most “aging research” is focused on age-associated pathologies, rather than the fundamental biology of aging (Hayflick, 2000; 2007b). Because of this, and despite the fact that a number of pathways related to longevity have been identified and elucidated, it could be strongly argued that scientists today know little more about the true reasons for aging than was known 50 years ago. This is exemplified by the clear lack of any consensus theory of aging. Even worse, despite the continued accumulation of serious anomalies challenging common aging theories, the scientific community remains complacent. The multitude of aging theories, the discontinuities between them, and the failure of the scientific community to agree on the root causes of aging, while disappointing, represents a clear opportunity to revisit this problem with a multidisciplinary and somewhat radical approach.

In many aging theories proposed during the last half century, evolutionary theory has been relied on heavily, and often singularly, to explain aging. Yet, an evolutionary-based model of senescence that does not incorporate physical law is incomplete. Previous attempts to undermine the relevance and importance of thermodynamics in aging (Mitteldorf, 2010) are terribly misguided, as they fail to recognize and accept the impact of the second law on mutual information flow within an organism. Nonequilibrium thermodynamic theory stipulates that biomolecules will suffer degradative insults with time. DNA molecules cannot escape the inevitability that some of these insults will result in permanent changes to the genetic sequence. As it is not possible to select for only neutral or advantageous configurations in the individual, the loss of mutual DNA information requires that the performance of the individual will decrease with time. The species is also susceptible to the loss of mutual DNA information but through selection is able to preserve species fitness. In any case, mutual DNA information cannot be retained indefinitely in either the species or in individuals.

Although evolutionary theory predicts that senescence will arise inevitably due to declining selective pressure with age (Hamilton, 1966), this is redundant for aging to occur. Furthermore, blanket acceptance of declining selective pressure as the sole cause of aging is a logical fallacy (converse error). The rate at which mutual DNA information is lost in an individual can clearly be impacted by factors that otherwise affect species fitness. This is most easily conceptualized by examining the flow of genetic information through the individual cells of an organism and considering those factors that may increase or decrease the probability of an irreversible insult occurring to a DNA molecule. The predicted effect of some of these factors (many of which can be described by allometric and other trends) on the rate of mutual DNA information loss suggests the presence of a negative correlation between the rate of mutual DNA information loss and longevity. For this reason, it is reasonable to propose that the loss of mutual DNA information may be a more critical determinant of longevity than declining selective pressure in many organisms.

500 Living organisms are nonequilibrium systems. As such, they are constantly producing internal entropy—leading to  
501 biomolecular degradation. This degradation must be continually countered in order to prevent structure from quickly  
502 deteriorating to a nonviable state. It is not possible to attain a “perfect” quality state (a degradation state of zero) in any  
503 population of biomolecules. The quality (or degradation state) of a biomolecular ensemble is partly determined by the  
504 rate at which degraded molecules are replaced and damage is repaired. Biomolecular quality also depends on the ability  
505 to resist thermodynamic potentials and the magnitude of the potentials themselves—as stipulated by the biomolecular  
506 structure, the microenvironment and the time distribution between the high thermodynamic potential “active” molecular  
507 state and the resting state. These parameters are specified by an organism’s genotype and may vary considerably between  
508 organisms.

509 Aging is perceived to commence when an individual is no longer able to maintain a youthful steady state—although  
510 individuals actually begin to lose mutual DNA information at conception. Biomolecular and cellular turnover rate alone  
511 cannot explain why youthful steady-state homeostasis is lost. An obvious vulnerability lies in any biocomponent that lacks  
512 renewal capacity. Given the short half-life of most biomolecules, those that can be expressed are unlikely to be the culprits  
513 in organisms with at least moderate longevity. As DNA molecules are the information-containing biomolecules encoding  
514 all other biomolecules, the absolute integrity of the information in DNA molecules would have to be retained universally  
515 within an individual to avoid a shift from the existing steady state. This, of course, is not possible. Cellular pooling (via  
516 stem cells) increases DNA information redundancy and must be scaled appropriately within an organism to ensure that  
517 mutual DNA information is preserved for a sufficiently long period of time and at adequate levels to satisfy the longevity  
518 requirements of the organism. With age, undersized stem-cell pools would result in progenitor cells that prematurely  
519 reach the Hayflick limit (Hayflick and Moorhead, 1961) and/or stem cells with excessive losses in mutual DNA information.

520 Increased biomolecular activity results in a higher rate of loss of mutual DNA information due to increased exposure of  
521 DNA molecules to the high thermodynamic stress conditions of replication and an increased rate of clonal expansion of  
522 compromised DNA molecules. This affects intracellular pools of mtDNA, as well as the fidelity of nuclear DNA. The loss of  
523 mutual DNA information will consume redundancy until a pathological phenotype is unavoidable. There are fitness  
524 tradeoffs associated with the establishment and preservation of information redundancy. Organisms must establish a  
525 balance such that their internal entropy management strategy is sufficient to preserve mutual DNA information for an  
526 adequate period of time—to meet the lifespan requirements of the organism—but not so burdensome as to lower fitness.  
527 This balance is, of course, represented by a species’ evolved genotype.

528 It is an interesting observation that organisms with shorter lifespans expend more energy on biomolecular repair and  
529 replacement. Although this is the precise opposite of what the disposable soma theory of aging would predict, it is, in fact,  
530 quite expected and straightforward to explain. Internal entropy production is higher in shorter-living organisms due to  
531 their increased peak power density; this necessitates a greater rate of negative entropy production, which is represented  
532 by upregulated biomolecular repair and replacement. A consequence of the increased metabolic activity required to  
533 achieve this is that higher thermodynamic stress is placed on DNA molecules (largely through increased replication  
534 rates)—resulting in an increase in the rate of loss of mutual DNA information which leads to reduced longevity. The  
535 establishment of a link between peak power density, metabolism, and longevity may help to explain the existence of many  
536 of the species lifespan trends that have been found to describe metazoans. The basic premise of the disposable soma  
537 theory is thus fatally flawed and should be rejected—lifespan is not positively correlated with the proportion of energy  
538 directed towards repair and replacement, but rather is likely largely determined by an organism’s overall entropy  
539 management strategy.

540 Longevity determination is encoded within the genome; however, genes are not the only longevity determinants. The  
541 phenotypic characteristics represented by those genetic elements should also be considered longevity determinants.  
542 Phenotype is contingent on the environment and environmental interaction factors, and is constrained, defined, and  
543 driven by universal law and evolutionary factors. The relationship between these drivers and phenotype is the  
544 fundamental core of a theoretical framework that may help to explain organismal aging and longevity determination. This



545 thinking is quite a departure from the current mainstream approach, which focuses on establishing direct relationships  
546 between particular genes and their observable effects on the aging phenotype—leading to short-sighted conclusions of  
547 cause and effect that reveal very little of the true essence of organismal aging.

548 I propose that the putative aging pathways are also involved in molding the progression of the aging phenotype. As mutual  
549 DNA information loss escalates to the point where youthful homeostasis can no longer be preserved, longevity optimizers  
550 adjust the configuration of an organism to lessen the effects of degradation on the viability of the individual. While  
551 longevity optimizers may be an important component of an organism’s entropy management strategy, it is useful to view  
552 these factors as separate from the primary longevity determinants because their mode of action is distinct.

553 If managed deterioration is a true component of the aging process, then there is little doubt that scientists are drawing  
554 some incorrect conclusions from studies focusing on manipulation of the aging phenotype. The *retrospective* approach  
555 taken by most scientists to demystifying aging, where the end results are studied and one attempts to work backwards to  
556 establish causality, has virtually no chance of success. Manipulation of many of the genetic elements implicated in  
557 longevity can indeed alter certain aspects of the aging phenotype. Yet, the complexity of the aging phenotype and the  
558 many intercorrelations between longevity determinants and optimizers make it very difficult to make meaningful  
559 inferences towards the true causes of aging, absent a solid theoretical framework of the aging process. Instead, this  
560 approach will lead to incorrect presumptions regarding the culpability of a particular factor as a root-level longevity  
561 determinant or “cause” of aging. A *prospective* approach is required to both recognize the possibility of the presence of  
562 managed deterioration and to understand and properly interpret experimental results involving longevity determinants  
563 and optimizers.

564 While evolutionary theory alone cannot explain aging, neither can other theories that approach this problem from a  
565 singular field of study—a multidisciplinary approach is required. The theoretical framework discussed here utilizes  
566 concepts from physics, information theory, as well as evolutionary theory. This theory differs from most others in that it  
567 does not ask, “what could possibly go wrong?” but rather, “what will inevitably go wrong and why?” While the theory put  
568 forth here is well supported by the findings of others in diverse fields, it is admittedly not devoid of speculative  
569 components. Additional data, such as the species differences in mitobiogenesis rates, would bring better clarity to  
570 important questions that remain and would be very helpful in refining the argument presented here.

580 **REFERENCES**

- 581 Ahima, R.S. (2009). Connecting obesity, aging and diabetes. *Nat Med* 15, 996–997.
- 582 American Cancer Society (2013). *Cancer Facts and Figures 2013* (Atlanta: American Cancer Society).
- 583 Andziak, B., and Buffenstein, R. (2006). Disparate patterns of age-related changes in lipid peroxidation in long-lived  
584 naked mole-rats and shorter-lived mice. *Aging Cell* 5, 525–532.
- 585 Andziak, B., O’Connor, T.P., Qi, W., DeWaal, E.M., Pierce, A., Chaudhuri, A.R., Van Remmen, H., and Buffenstein, R.  
586 (2006). High oxidative damage levels in the longest-living rodent, the naked mole-rat. *Aging Cell* 5, 463–471.
- 587 Andziak, B., O’Connor, T.P., and Buffenstein, R. (2005). Antioxidants do not explain the disparate longevity between mice  
588 and the longest-living rodent, the naked mole-rat. *Mech Ageing Dev* 126, 1206–1212.
- 589 Arias-Gonzalez, J.R. (2012). Entropy involved in fidelity of DNA replication. *PLoS ONE* 7, e42272.
- 590 Ashrafi, G., and Schwarz, T.L. (2012). The pathways of mitophagy for quality control and clearance of mitochondria. *Cell*  
591 *Death Differ* 20, 31–42.
- 592 Austad, S.N. (2005). Diverse aging rates in metazoans: targets for functional genomics. *Mech Ageing Dev* 126, 43–49.
- 593 Austad, S.N. (2009). Comparative biology of aging. *J Gerontol a Biol Sci Med Sci* 64, 199–201.
- 594 Bahar, R., Hartmann, C.H., Rodriguez, K.A., Denny, A.D., Busuttill, R.A., Dollé, M.E.T., Calder, R.B., Chisholm, G.B., Pollock,  
595 B.H., Klein, C.A., et al. (2006). Increased cell-to-cell variation in gene expression in ageing mouse heart. *Nature* 441,  
596 1011–1014.
- 597 Bailey, K.J., Maslov, A.Y., and Pruitt, S.C. (2004). Accumulation of mutations and somatic selection in aging neural  
598 stem/progenitor cells. *Aging Cell* 3, 391–397.
- 599 Bailly, A., and Gartner, A. (2013). Germ cell apoptosis and DNA damage responses. *Adv Exp Med Biol* 757, 249–276.
- 600 Balch, W.E., Morimoto, R.I., Dillin, A., and Kelly, J.W. (2008). Adapting Proteostasis for Disease Intervention. *Science* 319,  
601 916–919.
- 602 Baum, D.A., Futuyma, D.J., Hoekstra, H.E., Lenski, R.E., Moore, A.J., Peichel, C.L., Schluter, D., and Whitlock, M.C. (2013).  
603 *The Princeton Guide to Evolution* (Princeton University Press).
- 604 Beerman, I., Seita, J., Inlay, M.A., Weissman, I.L., and Rossi, D.J. (2014). Quiescent Hematopoietic Stem Cells Accumulate  
605 DNA Damage during Aging that Is Repaired upon Entry into Cell Cycle. *Stem Cell* 15, 37–50.
- 606 Bell, J.T., Tsai, P.-C., Yang, T.-P., Pidsley, R., Nisbet, J., Glass, D., Mangino, M., Zhai, G., Zhang, F., Valdes, A., et al. (2012).  
607 Epigenome-wide scans identify differentially methylated regions for age and age-related phenotypes in a healthy ageing  
608 population. *PLoS Genetics* 8, e1002629.
- 609 Ben-Zvi, A., Miller, E.A., and Morimoto, R.I. (2009). Collapse of proteostasis represents an early molecular event in  
610 *Caenorhabditis elegans* aging. *Proc Natl Acad Sci USA* 106, 14914–14919.
- 611 Bennett, M.B., Ker, R.F., Dimery, N.J., and Alexander, R. (1986). Mechanical properties of various mammalian tendons. *J*  
612 *Zool (London)* 209, 537–548.
- 613 Biewener, A.A. (1989). Scaling body support in mammals: limb posture and muscle mechanics. *Science* 245, 45–48.
- 614 Biewener, A.A., and Blickhan, R. (1988). Kangaroo rat locomotion: design for elastic energy storage or acceleration? *J Exp*  
615 *Biol* 140, 243–255.

- 616 Biewener, A., Alexander, R.M., and Heglund, N.C. (1981). Elastic energy storage in the hopping of kangaroo rats  
617 (*Dipodomys spectabilis*). *J Zool (London)* 195, 369–383.
- 618 Blüher, M., Kahn, B.B., and Kahn, C.R. (2003). Extended Longevity in Mice Lacking the Insulin Receptor in Adipose Tissue.  
619 *Science* 299, 572–574.
- 620 Bocklandt, S., Lin, W., Sehl, M.E., Sánchez, F.J., Sinsheimer, J.S., Horvath, S., and Vilain, E. (2011). Epigenetic Predictor of  
621 Age. *PLoS ONE* 6, e14821.
- 622 Boks, M.P., Derks, E.M., Weisenberger, D.J., Strengman, E., Janson, E., Sommer, I.E., Kahn, R.S., and Ophoff, R.A. (2009).  
623 The relationship of DNA methylation with age, gender and genotype in twins and healthy controls. *PLoS ONE* 4, e6767.
- 624 Bradshaw, S.D., and Bradshaw, F.J. (2009). Measurement of the rate of protein turnover and synthesis in the marsupial  
625 Honey possum (*Tarsipes rostratus*). *J Comp Physiol B* 179, 183–192.
- 626 Brandfonbrener, M., Landowne, M., and Shock, N.W. (1955). Changes in Cardiac Output with Age. *Circulation* 12, 557.
- 627 Brinster, R.L., and Troike, D.E. (1979). Requirements for blastocyst development in vitro. *J Anim Sci* 49 Suppl 2, 26–34.
- 628 Calder, W.A. (1984). *Size, Function, and Life History* (Harvard University Press).
- 629 Calnan, D.R., and Brunet, A. (2008). The FoxO code. *Oncogene* 27, 2276–2288.
- 630 Campisi, J. (2005). Senescent Cells, Tumor Suppression, and Organismal Aging: Good Citizens, Bad Neighbors. *Cell* 120,  
631 513–522.
- 632 Cao, Z., Wanagat, J., McKiernan, S.H., and Aiken, J.M. (2001). Mitochondrial DNA deletion mutations are concomitant  
633 with ragged red regions of individual, aged muscle fibers: analysis by laser-capture microdissection. *Nucleic Acids Res* 29,  
634 4502–4508.
- 635 Carlson, M.E., and Conboy, I.M. (2007). Loss of stem cell regenerative capacity within aged niches. *Aging Cell* 6, 371–382.
- 636 Cencioni, C., Spallotta, F., Martelli, F., Valente, S., Mai, A., Zeiher, A., and Gaetano, C. (2013). Oxidative Stress and  
637 Epigenetic Regulation in Ageing and Age-Related Diseases. *IJMS* 14, 17643–17663.
- 638 Chambers, S.M., Shaw, C.A., Gatza, C., Fisk, C.J., Donehower, L.A., and Goodell, M.A. (2007). Aging Hematopoietic Stem  
639 Cells Decline in Function and Exhibit Epigenetic Dysregulation. *PLoS Biol* 5, e201.
- 640 Chan, S.S.L., and Copeland, W.C. (2009). DNA polymerase gamma and mitochondrial disease: Understanding the  
641 consequence of *POLG* mutations. *Biochimica Et Biophysica Acta (BBA) - Bioenergetics* 1787, 312–319.
- 642 Christensen, B.C., Houseman, E.A., Marsit, C.J., Zheng, S., Wrensch, M.R., Wiemels, J.L., Nelson, H.H., Karagas, M.R.,  
643 Padbury, J.F., Bueno, R., et al. (2009). Aging and environmental exposures alter tissue-specific DNA methylation  
644 dependent upon CpG island context. *PLoS Genetics* 5, e1000602.
- 645 Christiansen, L., Lenart, A., Tan, Q., Vaupel, J.W., Aviv, A., McGue, M., and Christensen, K. (2015). DNA methylation age is  
646 associated with mortality in a longitudinal Danish twin study. *Aging Cell* 15, 149–154.
- 647 Collins, M.L., Eng, S., Hoh, R., and Hellerstein, M.K. (2003). Measurement of mitochondrial DNA synthesis in vivo using a  
648 stable isotope-mass spectrometric technique. *J Appl Physiol* 94, 2203–2211.
- 649 Cookson, M.R. (2012). Parkinsonism due to mutations in PINK1, parkin, and DJ-1 and oxidative stress and mitochondrial  
650 pathways. *Cold Spring Harb Perspect Med* 2, a009415.
- 651 Couture, P., and Hulbert, A.J. (1995). Membrane fatty acid composition of tissues is related to body mass of mammals. *J*  
652 *Membr Biol* 148, 27–39.

- 653 Daum, G. (1985). Lipids of mitochondria. *Biochemica Et Biophysica Acta* 822, 1–42.
- 654 Day, K., Waite, L.L., Thalacker-Mercer, A., West, A., Bamman, M.M., Brooks, J.D., Myers, R.M., and Absher, D. (2013).  
655 Differential DNA methylation with age displays both common and dynamic features across human tissues that are  
656 influenced by CpG landscape. *Genome Biol* 14, R102.
- 657 De Baets, G., Reumers, J., Delgado Blanco, J., Dopazo, J., Schymkowitz, J., and Rousseau, F. (2011). An Evolutionary  
658 Trade-Off between Protein Turnover Rate and Protein Aggregation Favors a Higher Aggregation Propensity in Fast  
659 Degrading Proteins. *PLoS Comp Biol* 7, e1002090.
- 660 De Bont, R., and van Larebeke, N. (2004). Endogenous DNA damage in humans: a review of quantitative data.  
661 *Mutagenesis* 19, 169–185.
- 662 Delaney, M.A., Ward, J.M., Walsh, T.F., Chinnadurai, S.K., Kerns, K., Kinsel, M.J., and Treuting, P.M. (2016). Initial Case  
663 Reports of Cancer in Naked Mole-rats (*Heterocephalus glaber*). *Vet Pathol*.
- 664 Demirel, Y. (2014a). Nonequilibrium thermodynamics: transport and rate processes in physical, chemical and biological  
665 systems (Elsevier).
- 666 Demirel, Y. (2014b). Information in Biological Systems and the Fluctuation Theorem. *Entropy* 16, 1931–1948.
- 667 Deng, Y., Chan, S.S., and Chang, S. (2008). Telomere dysfunction and tumour suppression: the senescence connection.  
668 *Nat Rev Cancer* 8, 450–458.
- 669 Douglas, P.M., and Dillin, A. (2010). Protein homeostasis and aging in neurodegeneration. *J Cell Biol* 190, 719–729.
- 670 Dumont, N.A., Wang, Y.X., and Rudnicki, M.A. (2015). Intrinsic and extrinsic mechanisms regulating satellite cell function.  
671 *Development* 142, 1572–1581.
- 672 ENCODE Project Consortium, Birney, E., Stamatoyannopoulos, J.A., Dutta, A., Guigó, R., Gingeras, T.R., Margulies, E.H.,  
673 Weng, Z., Snyder, M., Dermitzakis, E.T., et al. (2007). Identification and analysis of functional elements in 1% of the  
674 human genome by the ENCODE pilot project. *Nature* 447, 799–816.
- 675 Else, P.L. (2004). Respiration rate of hepatocytes varies with body mass in birds. *J Exp Biol* 207, 2305–2311.
- 676 Else, P.L., and Wu, B.J. (1999). What role for membranes in determining the higher sodium pump molecular activity of  
677 mammals compared to ectotherms? *J Comp Physiol B, Biochem Syst Environ Physiol* 169, 296–302.
- 678 Else, P.L., Windmill, D.J., and Markus, V. (1996). Molecular activity of sodium pumps in endotherms and ectotherms. *Am*  
679 *J Physiol* 271, R1287–1294.
- 680 Euler, L. (1767). Recherches générales sur la mortalité et la multiplication du genre humain. In *Memoires De L'academie*  
681 *Des Sciences De Berlin*, pp. 144–164.
- 682 Everett, A.W., Taylor, R.R., and Sparrow, M.P. (1977). Protein synthesis during right-ventricular hypertrophy after  
683 pulmonary-artery stenosis in the dog. *Biochem J* 166, 315–321.
- 684 Eyre-Walker, A., and Keightley, P.D. (2007). The distribution of fitness effects of new mutations. *Nat Rev Genet* 8, 610–  
685 618.
- 686 Faulks, S.C., Turner, N., Else, P.L., and Hulbert, A.J. (2006). Calorie restriction in mice: effects on body composition, daily  
687 activity, metabolic rate, mitochondrial reactive oxygen species production, and membrane fatty acid composition. *J*  
688 *Gerontol a Biol Sci Med Sci* 61, 781–794.

- 689 Figge, M.T., Reichert, A.S., Meyer-Hermann, M., and Osiewacz, H.D. (2012). Deceleration of Fusion–Fission Cycles  
690 Improves Mitochondrial Quality Control during Aging. *PLoS Comp Biol* 8, e1002576.
- 691 Fisher, R.A. (1930). The genetical theory of natural selection. (Oxford).
- 692 Florath, I., Butterbach, K., Müller, H., Bewerunge-Hudler, M., and Brenner, H. (2013). Cross-sectional and longitudinal  
693 changes in DNA methylation with age: an epigenome-wide analysis revealing over 60 novel age-associated CpG sites.  
694 *Hum Mol Gen* 23, 1186–1201.
- 695 Frederico, L.A., Kunkel, T.A., and Shaw, B.R. (1990). A sensitive genetic assay for the detection of cytosine deamination:  
696 determination of rate constants and the activation energy. *Biochemistry* 29, 2532–2537.
- 697 Garagnani, P., Bacalini, M.G., Pirazzini, C., Gori, D., Giuliani, C., Mari, D., Di Blasio, A.M., Gentilini, D., Vitale, G., Collino,  
698 S., et al. (2012). Methylation of ELOVL2 gene as a new epigenetic marker of age. *Aging Cell* 11, 1132–1134.
- 699 García-Prat, L., Sousa-Victor, P., and Muñoz-Cánoves, P. (2013). Functional dysregulation of stem cells during aging: a  
700 focus on skeletal muscle stem cells. *FEBS J* 280, 4051–4062.
- 701 Garland, T. (1982). The relation between maximal running speed and body mass in terrestrial mammals. *J Zool, Lond*  
702 199, 157–170.
- 703 Garlick, P.J., and Marshall, I. (1972). A technique for measuring brain protein synthesis. *J Neurochem* 19, 577–583.
- 704 Gentilini, D., Mari, D., Castaldi, D., Remondini, D., Ogliari, G., Ostan, R., Bucci, L., Sirchia, S.M., Tabano, S., Cavagnini, F.,  
705 et al. (2012). Role of epigenetics in human aging and longevity: genome-wide DNA methylation profile in centenarians  
706 and centenarians' offspring. *Age (Dordr)* 35, 1961–1973.
- 707 Greaves, L.C., Elson, J.L., Nootboom, M., Grady, J.P., Taylor, G.A., Taylor, R.W., Mathers, J.C., Kirkwood, T.B.L., and  
708 Turnbull, D.M. (2012). Comparison of mitochondrial mutation spectra in ageing human colonic epithelium and disease:  
709 absence of evidence for purifying selection in somatic mitochondrial DNA point mutations. *PLoS Genetics* 8, e1003082.
- 710 Greaves, L.C., Nootboom, M., Elson, J.L., Tuppen, H.A.L., Taylor, G.A., Commane, D.M., Arasaradnam, R.P., Khrapko, K.,  
711 Taylor, R.W., Kirkwood, T.B.L., et al. (2014). Clonal expansion of early to mid-life mitochondrial DNA point mutations  
712 drives mitochondrial dysfunction during human ageing. *PLoS Genetics* 10, e1004620.
- 713 Gredilla, R., Garm, C., Holm, R., Bohr, V.A., and Stevnsner, T. (2010). Differential age-related changes in mitochondrial  
714 DNA repair activities in mouse brain regions. *Neurobiol Aging* 31, 993–1002.
- 715 Grosse, I., Buldyrev, S.V., Stanley, H.E., Holste, D., and Herzel, H. (2000). Average mutual information of coding and  
716 noncoding DNA. *Pac Symp Biocomput* 5, 611–620.
- 717 Grounds, M.D. (1998). Age-associated changes in the response of skeletal muscle cells to exercise and regeneration. *Ann*  
718 *N Y Acad Sci* 854, 78–91.
- 719 Guo, K.K., and Ren, J. (2006). Cardiac overexpression of alcohol dehydrogenase (ADH) alleviates aging-associated  
720 cardiomyocyte contractile dysfunction: role of intracellular Ca<sup>2+</sup> cycling proteins. *Aging Cell* 5, 259–265.
- 721 Haag-Liautard, C., Coffey, N., Houle, D., Lynch, M., Charlesworth, B., and Keightley, P.D. (2008). Direct estimation of the  
722 mitochondrial DNA mutation rate in *Drosophila melanogaster*. *PLoS Biol* 6, e204.
- 723 Hamilton, W.D. (1966). The moulding of senescence by natural selection. *J Theor Biol* 12, 12–45.
- 724 Hannum, G., Guinney, J., Zhao, L., Zhang, L., Hughes, G., Sada, S., Klotzle, B., Bibikova, M., Fan, J.-B., Gao, Y., et al.  
725 (2013). Genome-wide methylation profiles reveal quantitative views of human aging rates. *Mol Cell* 49, 359–367.

- 726 Hansen, K.D., Timp, W., Bravo, H.C., Sabunciyan, S., Langmead, B., McDonald, O.G., Wen, B., Wu, H., Liu, Y., Diep, D., et  
727 al. (2011). Increased methylation variation in epigenetic domains across cancer types. *Nat Genet* 43, 768–775.
- 728 Hayflick, L. (2007a). Biological Aging Is No Longer an Unsolved Problem. *Ann N Y Acad Sci* 1100, 1–13.
- 729 Hayflick, L., and Moorhead, P.S. (1961). The serial cultivation of human diploid cell strains. *Exp Cell Res* 25, 585.
- 730 Hayflick, L. (2000). The future of ageing. *Nature* 408, 267–269.
- 731 Hayflick, L. (2004). “Anti-aging” is an oxymoron. *J Gerontol a Biol Sci Med Sci* 59, B573–578.
- 732 Hayflick, L. (2007b). Entropy explains aging, genetic determinism explains longevity, and undefined terminology explains  
733 misunderstanding both. *PLoS Genetics* 3, e220.
- 734 Heglund, N.C., and Taylor, C.R. (1988). Speed, stride frequency and energy cost per stride: how do they change with  
735 body size and gait? *J Exp Biol* 138, 301–318.
- 736 Heglund, N.C., Fedak, M.A., Taylor, C.R., and Cavagna, G.A. (1982). Energetics and mechanics of terrestrial locomotion.  
737 IV. Total mechanical energy changes as a function of speed and body size in birds and mammals. *J Exp Biol* 97, 57–66.
- 738 Hetzer, M.W. (2013). Protein homeostasis: live long, won't prosper. *Nat Rev Mol Cell Biol* 14, 55–61.
- 739 Heyn, H., Li, N., Ferreira, H.J., Moran, S., Pisano, D.G., Gomez, A., Diez, J., Sanchez-Mut, J.V., Setien, F., Carmona, F.J., et  
740 al. (2012). Distinct DNA methylomes of newborns and centenarians. *Proc Natl Acad Sci USA* 109, 10522–10527.
- 741 Hochwagen, A., and Amon, A. (2006). Checking Your Breaks: Surveillance Mechanisms of Meiotic Recombination. *Curr*  
742 *Biol* 16, R217–R228.
- 743 Holliday, R. (2010). Aging and the decline in health. *Health* 02, 615–619.
- 744 Horvath, S. (2013). DNA methylation age of human tissues and cell types. *Genome Biol* 14, R115.
- 745 Hulbert, A.J. (2003). Life, death and membrane bilayers. *J Exp Biol* 206, 2303–2311.
- 746 Hulbert, A.J. (2005). On the importance of fatty acid composition of membranes for aging. *J Theor Biol* 234, 277–288.
- 747 Hulbert, A.J. (2008). The links between membrane composition, metabolic rate and lifespan. *Comp Biochem Physiol*,  
748 *Part a Mol Integr Physiol* 150, 196–203.
- 749 Hulbert, A.J., and Else, P.L. (1999). Membranes as possible pacemakers of metabolism. *J Theor Biol* 199, 257–274.
- 750 Hulbert, A.J., Pamplona, R., Buffenstein, R., and Buttemer, W.A. (2007). Life and death: metabolic rate, membrane  
751 composition, and life span of animals. *Physiol Rev* 87, 1175–1213.
- 752 Hwang, J.S., Hwang, J.S., Chang, I., and Kim, S. (2007). Age-associated decrease in proteasome content and activities in  
753 human dermal fibroblasts: restoration of normal level of proteasome subunits reduces aging markers in fibroblasts from  
754 elderly persons. *J Gerontol a Biol Sci Med Sci* 62, 490–499.
- 755 Itsara, L.S., Kennedy, S.R., Fox, E.J., Yu, S., Hewitt, J.J., Sanchez-Contreras, M., Cardozo-Pelaez, F., and Pallanck, L.J.  
756 (2014). Oxidative stress is not a major contributor to somatic mitochondrial DNA mutations. *PLoS Genetics* 10,  
757 e1003974.
- 758 Jaramillo-Lambert, A., Harigaya, Y., Vitt, J., Villeneuve, A., and Engebrecht, J. (2010). Meiotic Errors Activate Checkpoints  
759 that Improve Gamete Quality without Triggering Apoptosis in Male Germ Cells. *Curr Biol* 20, 2078–2089.
- 760 Kennedy, S.R., Loeb, L.A., and Herr, A.J. (2011). Somatic mutations in aging, cancer and neurodegeneration. *Mech Ageing*  
761 *Dev* 133, 118–126.

- 762 Kennedy, S.R., Salk, J.J., Schmitt, M.W., and Loeb, L.A. (2013). Ultra-Sensitive Sequencing Reveals an Age-Related  
763 Increase in Somatic Mitochondrial Mutations That Are Inconsistent with Oxidative Damage. *PLoS Genetics* 9, e1003794.
- 764 Kenyon, C., Chang, J., Gensch, E., Rudner, A., and Tabtiang, R. (1993). A *C. elegans* mutant that lives twice as long as wild  
765 type. *Nature* 366, 461–464.
- 766 Kenyon, C.J. (2010). The genetics of ageing. *Nature* 464, 504–512.
- 767 Kilbourne, B.M., and Hoffman, L.C. (2013). Scale Effects between Body Size and Limb Design in Quadrupedal Mammals.  
768 *PLoS ONE* 8, e78392.
- 769 Kim, N., and Jinks-Robertson, S. (2012). Transcription as a source of genome instability. *Nat Rev Genet* 13, 204–214.
- 770 Kirkwood, T.B. (1977). Evolution of ageing. *Nature* 270, 301–304.
- 771 Kirkwood, T.B., and Holliday, R. (1979). The evolution of ageing and longevity. *Proc R Soc Lond, B, Biol Sci* 205, 531–546.
- 772 Kirkwood, T.B., and Rose, M.R. (1991). Evolution of senescence: late survival sacrificed for reproduction. *Philos Trans R*  
773 *Soc Lond, B, Biol Sci* 332, 15–24.
- 774 Kirkwood, T.B.L. (2005). Understanding the Odd Science of Aging. *Cell* 120, 437–447.
- 775 Kirkwood, T. (1999). *Time of Our Lives : The Science of Human Aging* (Oxford University Press).
- 776 Kleiber, M. (1932). Body size and metabolism. *Hilgardia* 6, 315–353.
- 777 Kondepudi, D., and Prigogine, I. (2014). *Modern Thermodynamics* (John Wiley & Sons).
- 778 Kowald, A., and Kirkwood, T.B.L. (2011). Evolution of the mitochondrial fusion-fission cycle and its role in aging. *Proc Natl*  
779 *Acad Sci USA* 108, 10237–10242.
- 780 Kram, R., and Taylor, C.R. (1990). Energetics of running: a new perspective. *Nature* 346, 265–267.
- 781 Kravtsov, Y., Kudryavtseva, E., McKee, A.C., Geula, C., Kowall, N.W., and Khrapko, K. (2006). Mitochondrial DNA  
782 deletions are abundant and cause functional impairment in aged human substantia nigra neurons. *Nat Genet* 38, 518–  
783 520.
- 784 Larsson, N.-G. (2010). Somatic Mitochondrial DNA Mutations in Mammalian Aging. *Annu Rev Biochem* 79, 683–706.
- 785 Lee, H.-S., Ma, H., Juanes, R.C., Tachibana, M., Sparman, M., Woodward, J., Ramsey, C., Xu, J., Kang, E.-J., Amato, P., et  
786 al. (2012). Rapid mitochondrial DNA segregation in primate preimplantation embryos precedes somatic and germline  
787 bottleneck. *Cell Rep* 1, 506–515.
- 788 Liebermeister, W., Noor, E., Flamholz, A., Davidi, D., Bernhardt, J., and Milo, R. (2014). Visual account of protein  
789 investment in cellular functions. *Proc Natl Acad Sci USA* 111, 8488–8493.
- 790 Lindahl, T. (1993). Instability and decay of the primary structure of DNA. *Nature* 362, 709–715.
- 791 Lodato, M.A., Woodworth, M.B., Lee, S., Evrony, G.D., Mehta, B.K., Karger, A., Lee, S., Chittenden, T.W., D'Gama, A.M.,  
792 Cai, X., et al. (2015). Somatic mutation in single human neurons tracks developmental and transcriptional history.  
793 *Science* 350, 94–98.
- 794 Lotka, A.J., and Sharpe, F.R. (1911). A problem in age distribution. *Philos Mag* 21, 435–438.
- 795 Mahony, S., Auron, P.E., and Benos, P.V. (2007). Inferring protein DNA dependencies using motif alignments and mutual  
796 information. *Bioinformatics* 23, i297–i304.

- 797 McClay, J.L., Aberg, K.A., Clark, S.L., Nerella, S., Kumar, G., Xie, L.Y., Hudson, A.D., Harada, A., Hultman, C.M., Magnusson,  
798 P.K.E., et al. (2013). A methylome-wide study of aging using massively parallel sequencing of the methyl-CpG-enriched  
799 genomic fraction from blood in over 700 subjects. *Hum Mol Gen* 23, 1175–1185.
- 800 McNab, B.K. (1966). The metabolism of fossorial rodents: a study of convergence. *Ecology* 712–733.
- 801 Medawar, P.B. (1952). An unsolved problem of biology.
- 802 Medvedev, Z.A. (1972). Possible role of repeated nucleotide sequences in DNA in the evolution of life spans of  
803 differentiated cells. *Nature* 237, 453–454.
- 804 Miller, B.F., Robinson, M.M., Bruss, M.D., Hellerstein, M., and Hamilton, K.L. (2011). A comprehensive assessment of  
805 mitochondrial protein synthesis and cellular proliferation with age and caloric restriction. *Aging Cell* 11, 150–161.
- 806 Miller, B.F., Robinson, M.M., Reuland, D.J., Drake, J.C., Peelor, F.F., Bruss, M.D., Hellerstein, M.K., and Hamilton, K.L.  
807 (2013). Calorie restriction does not increase short-term or long-term protein synthesis. *J Gerontol a Biol Sci Med Sci* 68,  
808 530–538.
- 809 Mitchell, H.H., Hamilton, T.S., Steggerda, F.R., and Bean, H.W. (1945). The chemical composition of the adult human  
810 body and its bearing on the biochemistry of growth. *J Biol Chem* 168, 625–637.
- 811 Mitchell, T.W., Buffenstein, R., and Hulbert, A.J. (2007). Membrane phospholipid composition may contribute to  
812 exceptional longevity of the naked mole-rat (*Heterocephalus glaber*): a comparative study using shotgun lipidomics. *EXG*  
813 42, 1053–1062.
- 814 Mitteldorf, J. (2010). Aging is not a process of wear and tear. *Rejuvenation Res* 13, 322–326.
- 815 Moulton, C.R. (1923). Age and chemical development in mammals. *J Biol Chem* 57, 79–97.
- 816 Nagy, K.A. (2005). Field metabolic rate and body size. *J Exp Biol* 208, 1621–1625.
- 817 Niklas, K.J. (1994). *Plant Allometry* (University of Chicago Press).
- 818 Pacy, P.J., Price, G.M., Halliday, D., and Quevedo, M.R. (1994). Nitrogen homeostasis in man: the diurnal responses of  
819 protein synthesis and degradation and amino acid oxidation to diets with increasing protein intakes. *Clin Sci* 86, 103–  
820 118.
- 821 Pamplona, R., Portero-Otín, M., Riba, D., Ruiz, C., Prat, J., Bellmunt, M.J., and Barja, G. (1998). Mitochondrial membrane  
822 peroxidizability index is inversely related to maximum life span in mammals. *J Lipid Res* 39, 1989–1994.
- 823 Passos, J.F., Saretzki, G., Ahmed, S., Nelson, G., Richter, T., Peters, H., Wappler, I., Birket, M.J., Harold, G., Schaeuble, K.,  
824 et al. (2007). Mitochondrial Dysfunction Accounts for the Stochastic Heterogeneity in Telomere-Dependent Senescence.  
825 *PLoS Biol* 5, e110.
- 826 Perez-Campo, R., López-Torres, M., Cadenas, S., Rojas, C., and Barja, G. (1998). The rate of free radical production as a  
827 determinant of the rate of aging: evidence from the comparative approach. *J Comp Physiol B, Biochem Syst Environ*  
828 *Physiol* 168, 149–158.
- 829 Peters, R.H. (1986). *The Ecological Implications of Body Size* (Cambridge University Press).
- 830 Petersen, S., Saretzki, G., and Zglinicki, von, T. (1998). Preferential accumulation of single-stranded regions in telomeres  
831 of human fibroblasts. *Exp Cell Res* 239, 152–160.
- 832 Plata, G., and Vitkup, D. (2013). Genetic robustness and functional evolution of gene duplicates. *Nucleic Acids Res* 42,  
833 2405–2414.



- 834 Pontzer, H. (2007). Effective limb length and the scaling of locomotor cost in terrestrial animals. *J Exp Biol* 210, 1752–  
835 1761.
- 836 Porter, R.K., and Brand, M.D. (1995). Causes of differences in respiration rate of hepatocytes from mammals of different  
837 body mass. *Am J Physiol* 269, R1213–1224.
- 838 Porter, R.K., Hulbert, A.J., and Brand, M.D. (1996). Allometry of mitochondrial proton leak: influence of membrane  
839 surface area and fatty acid composition. *Am J Physiol* 271, R1550–1560.
- 840 Rakyan, V.K., Down, T.A., Maslau, S., Andrew, T., Yang, T.-P., Beyan, H., Whittaker, P., McCann, O.T., Finer, S., Valdes,  
841 A.M., et al. (2010). Human aging-associated DNA hypermethylation occurs preferentially at bivalent chromatin domains.  
842 *Genome Res* 20, 434–439.
- 843 Rattan, S.I.S. (1996). Synthesis, modifications, and turnover of proteins during aging. *Exp Gerontol* 31, 33.
- 844 Reeds, P.J., and Harris, C.I. (1981). Protein turnover in animals: man in his context. In *Nitrogen Metabolism in Man*,  
845 (London: Applied Science), pp. 391–408.
- 846 Reid, J.T., Bensadoun, A., and Bull, L.S. (1968). Some peculiarities in the body composition of animals. In *Body*  
847 *Composition in Animals and Man*.
- 848 Reilly, S.M., McElroy, E.J., and Biknevicius, A.R. (2007). Posture, gait and the ecological relevance of locomotor costs and  
849 energy-saving mechanisms in tetrapods. *Zoology (Jena)* 110, 271–289.
- 850 Richardson, A., and Cheung, H.T. (1982). Current concepts: I. The relationship between age-related changes in gene  
851 expression, protein turnover, and the responsiveness of an organism to stimuli. *Life Sci* 31, 605–613.
- 852 Riggs, J.E. (1994). Carcinogenesis, genetic instability and genomic entropy: insight derived from malignant brain tumor  
853 age specific mortality rate dynamics. *J Theor Biol* 170, 331–338.
- 854 Rossi, D.J., Jamieson, C.H.M., and Weissman, I.L. (2008). Stems Cells and the Pathways to Aging and Cancer. *Cell* 132,  
855 681–696.
- 856 Russell, K., Loble, G.E., and Millward, D.J. (2003). Whole-body protein turnover of a carnivore, *Felis silvestris catus*. *Br J*  
857 *Nutr* 89, 29–37.
- 858 Ryazanov, A.G., and Nefsky, B.S. (2001). Protein turnover plays a key role in aging. *Mech Ageing Dev* 123, 207–213.
- 859 Schulz, C., Wood, C.G., Jones, D.L., Tazuke, S.I., and Fuller, M.T. (2002). Signaling from germ cells mediated by the  
860 rhomboid homolog *stet* organizes encapsulation by somatic support cells. *Development* 129, 4523–4534.
- 861 Selman, C., Lingard, S., Choudhury, A.I., Batterham, R.L., Claret, M., Clements, M., Ramadani, F., Okkenhaug, K., Schuster,  
862 E., Blanc, E., et al. (2008). Evidence for lifespan extension and delayed age-related biomarkers in insulin receptor  
863 substrate 1 null mice. *FASEB J* 22, 807–818.
- 864 Shanley, D.P., and Kirkwood, T.B. (2000). Calorie restriction and aging: a life-history analysis. *Evolution* 54, 740–750.
- 865 Shyh-Chang, N., Daley, G.Q., and Cantley, L.C. (2013). Stem cell metabolism in tissue development and aging.  
866 *Development* 140, 2535–2547.
- 867 Smith, R.E. (1956). Quantitative relations between liver mitochondria metabolism and total body weight in mammals.  
868 *Ann N Y Acad Sci* 62, 405.
- 869 Sniegowski, P.D., Gerrish, P.J., Johnson, T., and Shaver, A. (2000). The evolution of mutation rates: separating causes  
870 from consequences. *Bioessays* 22, 1057–1066.

- 871 Sousa-Victor, P., García-Prat, L., Serrano, A.L., Perdiguero, E., and Muñoz-Cánoves, P. (2015). Muscle stem cell aging:  
872 regulation and rejuvenation. *Trends Endocrinol Metab* 26, 287–296.
- 873 Sousa-Victor, P., Gutarra, S., García-Prat, L., Rodriguez-Ubreva, J., Ortet, L., Ruiz-Bonilla, V., Jardí, M., Ballestar, E.,  
874 González, S., Serrano, A.L., et al. (2014). Geriatric muscle stem cells switch reversible quiescence into senescence.  
875 *Nature* 506, 316–321.
- 876 Speakman, J.R., Van Acker, A., and Harper, E.J. (2003). Age-related changes in the metabolism and body composition of  
877 three dog breeds and their relationship to life expectancy. *Aging Cell* 2, 265.
- 878 Storch, J., and Kleinfeld, A.M. (1985). The lipid structure of biological membranes. *Trends Biochem Sci* 10, 418.
- 879 Strang, K.T., and Steudel, K. (1990). Explaining the scaling of transport costs: the role of stride frequency and stride  
880 length. *J Zool (London)* 221, 343–358.
- 881 Suda, T., Takubo, K., and Semenza, G.L. (2011). Metabolic regulation of hematopoietic stem cells in the hypoxic niche.  
882 *Cell Stem Cell* 9, 298–310.
- 883 Suto, D., Ikeda, Y., Fujii, J., and Ohba, Y. (2006). Structural analysis of amino acids, oxidized by reactive oxygen species  
884 and an antibody against N-formylkynurenine. *J Clin Biochem Nutr* 38, 107–111.
- 885 Szathmáry, E., and Smith, J.M. (1995). The major evolutionary transitions. *Nature* 374, 227–232.
- 886 Tacutu, R., Craig, T., Budovsky, A., Wuttke, D., Lehmann, G., Taranukha, D., Costa, J., Fraifeld, V.E., and de Magalhães,  
887 J.P. (2012). Human Ageing Genomic Resources: integrated databases and tools for the biology and genetics of ageing.  
888 *Nucleic Acids Res* 41, D1027–1033.
- 889 Tatar, M., Kopelman, A., Epstein, D., Tu, M.P., Yin, C.M., and Garofalo, R.S. (2001). A mutant *Drosophila* insulin receptor  
890 homolog that extends life-span and impairs neuroendocrine function. *Science* 292, 107–110.
- 891 Tavernarakis, N., and Driscoll, M. (2002). Caloric restriction and lifespan: a role for protein turnover? *Mech Ageing Dev*  
892 123, 215–229.
- 893 Taylor, C.R., Heglund, N.C., and Maloiy, G.M. (1982). Energetics and mechanics of terrestrial locomotion. I. Metabolic  
894 energy consumption as a function of speed and body size in birds and mammals. *J Exp Biol* 97, 1–21.
- 895 Thompson, R.F., Atzmon, G., Gheorghe, C., Liang, H.Q., Lowes, C., Grealley, J.M., and Barzilai, N. (2010). Tissue-specific  
896 dysregulation of DNA methylation in aging. *Aging Cell* 9, 506–518.
- 897 Tomasetti, C., and Vogelstein, B. (2015). Cancer etiology. Variation in cancer risk among tissues can be explained by the  
898 number of stem cell divisions. *Science* 347, 78–81.
- 899 Tothova, Z., Kollipara, R., Huntly, B.J., Lee, B.H., Castrillon, D.H., Cullen, D.E., McDowell, E.P., Lazo-Kallanian, S., Williams,  
900 I.R., Sears, C., et al. (2007). FoxOs Are Critical Mediators of Hematopoietic Stem Cell Resistance to Physiologic Oxidative  
901 Stress. *Cell* 128, 325–339.
- 902 Trindade, L.S., Aigaki, T., Peixoto, A.A., Balduino, A., Mânica da Cruz, I.B., and Heddle, J.G. (2013). A novel classification  
903 system for evolutionary aging theories. *Front Genet* 4, 25.
- 904 Turner, N., Else, P.L., and Hulbert, A.J. (2003). Docosahexaenoic acid (DHA) content of membranes determines molecular  
905 activity of the sodium pump: implications for disease states and metabolism. *Naturwissenschaften* 90, 521–523.
- 906 Turner, N., Hulbert, A.J., and Else, P.L. (2005). Sodium pump molecular activity and membrane lipid composition in two  
907 disparate ectotherms, and comparison with endotherms. *J Comp Physiol B* 175, 77–85.

- 908 Twig, G., Elorza, A., Molina, A.J.A., Mohamed, H., Wikstrom, J.D., Walzer, G., Stiles, L., Haigh, S.E., Katz, S., Las, G., et al.  
909 (2008). Fission and selective fusion govern mitochondrial segregation and elimination by autophagy. *EMBO J* 27, 433–  
910 446.
- 911 Verzijl, N., DeGroot, J., Thorpe, S.R., Bank, R.A., Shaw, J.N., Lyons, T.J., Bijlsma, J.W.J., Lafeber, F.P.J.G., Baynes, J.W., and  
912 TeKoppele, J.M. (2000). Effect of Collagen Turnover on the Accumulation of Advanced Glycation End Products. *J Biol*  
913 *Chem* 275, 39027–39031.
- 914 Vijg, J., and Campisi, J. (2008). Puzzles, promises and a cure for ageing. *Nature* 454, 1065–1071.
- 915 Wai, T., Teoli, D., and Shoubridge, E.A. (2008). The mitochondrial DNA genetic bottleneck results from replication of a  
916 subpopulation of genomes. *Nat Genet* 40, 1484–1488.
- 917 Waldera-Lupa, D.M., Kalfalah, F., Florea, A.-M., Sass, S., Kruse, F., Rieder, V., Tigges, J., Fritsche, E., Krutmann, J., Busch,  
918 H., et al. (2014). Proteome-wide analysis reveals an age-associated cellular phenotype of in situ aged human fibroblasts.  
919 *Aging (Albany NY)* 6, 856–878.
- 920 Wallace, D.C. (1999). Mitochondrial Diseases in Man and Mouse. *Science* 283, 1482–1488.
- 921 Wang (2009). Modern thermodynamics – New concepts based on the second law of thermodynamics. *Prog Nat Sci* 19,  
922 125–135.
- 923 Waterlow, J.C. (2006). Protein turnover (Oxfordshire: CABI).
- 924 West, G.B., Brown, J.H., and Enquist, B.J. (1997). A general model for the origin of allometric scaling laws in biology.  
925 *Science* 276, 122–126.
- 926 West, G.B., and Brown, J.H. (2005). The origin of allometric scaling laws in biology from genomes to ecosystems: towards  
927 a quantitative unifying theory of biological structure and organization. *J Exp Biol* 208, 1575–1592.
- 928 West, G.B., Woodruff, W.H., and Brown, J.H. (2002). Allometric scaling of metabolic rate from molecules and  
929 mitochondria to cells and mammals. *Proc Natl Acad Sci USA* 99 *Suppl 1*, 2473–2478.
- 930 White, C.R., and Seymour, R.S. (2005). Allometric scaling of mammalian metabolism. *J Exp Biol*.
- 931 Williams, G.C. (1957). Pleiotropy, Natural Selection, and the Evolution of Senescence. *Evolution* 11, 398–411.
- 932 Yaniv, Y., Juhaszova, M., and Sollott, S.J. (2013). Age-related changes of myocardial ATPsupply and demand mechanisms.  
933 *Trends Endocrinol Metab* 24, 495–505.
- 934 Yockey, H.P. (1974). An application of information theory to the Central Dogma and the Sequence Hypothesis. *J Theor*  
935 *Biol* 46, 369–406.
- 936 Youle, R.J., and Narendra, D.P. (2011). Mechanisms of mitophagy. *Nat Rev Mol Cell Biol* 12, 9–14.
- 937 Zangarelli, A., Chanseume, E., Morio, B., Brugère, C., Mosoni, L., Rousset, P., Giraudet, C., Patrac, V., Gachon, P., Boirie,  
938 Y., et al. (2006). Synergistic effects of caloric restriction with maintained protein intake on skeletal muscle performance  
939 in 21-month-old rats: a mitochondria-mediated pathway. *FASEB J* 20, 2439–2450.
- 940 Zglinicki, von, T. (2002). Oxidative stress shortens telomeres. *Trends Biochem Sci* 27, 339–344.
- 941 Zhang, Y., Zhang, L., Zhang, L., Bai, J., Ge, H., and Liu, P. (2010). Expression changes in DNA repair enzymes and  
942 mitochondrial DNA damage in aging rat lens. *Mol Vis* 16, 1754–1763.
- 943 Zheng, W., Khrapko, K., Coller, H.A., Thilly, W.G., and Copeland, W.C. (2006). Origins of human mitochondrial point  
944 mutations as DNA polymerase  $\gamma$ -mediated errors. *Mutat Res* 599, 11–20.

- 945 Zhou, B.B., and Elledge, S.J. (2000). The DNA damage response: putting checkpoints in perspective. *Nature* 408, 433–  
946 439.
- 947 Zhou, H.-X. (2010). Rate theories for biologists. *Quart Rev Biophys* 43, 219–293.
- 948 Zimniak, P. (2008). Detoxification reactions: Relevance to aging. *Ageing Res Rev* 7, 281–300.
- 949 de Magalhães, J.P., Costa, J., and Church, G.M. (2007). An analysis of the relationship between metabolism,  
950 developmental schedules, and longevity using phylogenetic independent contrasts. *J Gerontol a Biol Sci Med Sci* 62,  
951 149–160.
- 952 de Magalhães, J.P., Curado, J., and Church, G.M. (2009). Meta-analysis of age-related gene expression profiles identifies  
953 common signatures of aging. *Bioinformatics* 25, 875–881.
